# Supplementary material for: A novel isoform of MAP4 organises the paraxial microtubule array required for muscle cell differentiation
Source: eLife. 2015 Apr 21;4:e05697. doi: 10.7554/eLife.05697 (PMC4423121; doi:10.7554/eLife.05697)
Supplement: Supplementary file 1. — RNAseq_Myoblast_Myocyte. RNA sequencing data for C2C12 myoblasts and 60 hr differentiated myocytes (Trapnell et al., 2010) extracted for four regions in MAP4 as shown in Figure 2—figure supplement 1. DOI: http://dx.doi.org/10.7554/eLife.05697.038 [file elife05697s001.xlsx]

## Sheet: Summary
	C2C12 Myoblast	C2C12 Myocyte 60h	Region Length	Increase factor	RPM/bp	RPM/bp	Transcript Abundance	Transcript Abundance
	Total score	Total score			Myoblast	Myocyte	RPM/Kb	RPM/Kb
							Myoblast	Myocyte
N-term	2386570	2903390	1135	1.21655	2102.71	2558.05	2.10271	2.55805
C-term	531064	615783	294	1.15953	1806.34	2094.5	1.80634	2.0945
mMAP4	3770	1713040	3180	454.388	1.18553	538.693	0.00119	0.53869
oMAP4	733	12505	1360	17.06	0.53897	9.19485	0.000538971	0.00919

## Sheet: N_Myoblast
track type=wiggle_0 name="C2C12 Myob Raw" description="C2C12 Myoblast RNA-seq Raw Signal from ENCODE/Caltech"
#bedGraph section chr9:109911026-109936899
chr9	109936876	109936877	1661
chr9	109936877	109936878	1694
chr9	109936878	109936879	1701
chr9	109936879	109936880	1698
chr9	109936880	109936881	1766
chr9	109936881	109936882	1770
chr9	109936882	109936883	1787
chr9	109936883	109936884	1804
chr9	109936884	109936885	1790
chr9	109936885	109936886	1772
chr9	109936886	109936887	1778
chr9	109936887	109936888	1750
chr9	109936888	109936889	1759
chr9	109936889	109936890	1768
chr9	109936890	109936891	1781
chr9	109936891	109936892	1804
chr9	109936892	109936893	1803
chr9	109936893	109936894	1779
chr9	109936894	109936895	1767
chr9	109936895	109936896	1773
chr9	109936896	109936897	1820
chr9	109936897	109936898	1799
chr9	109936898	109936899	1830
#bedGraph section chr9:109936899-109937943
chr9	109936899	109936900	1765
chr9	109936900	109936901	1748
chr9	109936901	109936902	1719
chr9	109936902	109936903	1690
chr9	109936903	109936904	1694
chr9	109936904	109936905	1690
chr9	109936905	109936906	1662
chr9	109936906	109936907	1624
chr9	109936907	109936908	1619
chr9	109936908	109936909	1594
chr9	109936909	109936910	1619
chr9	109936910	109936911	1636
chr9	109936911	109936912	1639
chr9	109936912	109936913	1628
chr9	109936913	109936914	1691
chr9	109936914	109936915	1756
chr9	109936915	109936916	1782
chr9	109936916	109936917	1783
chr9	109936917	109936918	1820
chr9	109936918	109936919	1826
chr9	109936919	109936920	1966
chr9	109936920	109936921	1974
chr9	109936921	109936922	2030
chr9	109936922	109936923	2042
chr9	109936923	109936924	2041
chr9	109936924	109936925	2056
chr9	109936925	109936926	2089
chr9	109936926	109936927	2125
chr9	109936927	109936928	2139
chr9	109936928	109936929	2130
chr9	109936929	109936930	2121
chr9	109936930	109936931	2109
chr9	109936931	109936932	2131
chr9	109936932	109936933	2153
chr9	109936933	109936934	2160
chr9	109936934	109936935	2176
chr9	109936935	109936936	2190
chr9	109936936	109936937	2199
chr9	109936937	109936938	2194
chr9	109936938	109936939	2182
chr9	109936939	109936940	2192
chr9	109936940	109936941	2185
chr9	109936941	109936942	2181
chr9	109936942	109936943	2196
chr9	109936943	109936944	2199
chr9	109936944	109936945	2213
chr9	109936945	109936946	2209
chr9	109936946	109936947	2205
chr9	109936947	109936948	2224
chr9	109936948	109936949	2214
chr9	109936949	109936950	2224
chr9	109936950	109936951	2222
chr9	109936951	109936952	2239
chr9	109936952	109936953	2214
chr9	109936953	109936954	2187
chr9	109936954	109936955	2179
chr9	109936955	109936956	2176
chr9	109936956	109936957	2187
chr9	109936957	109936958	2227
chr9	109936958	109936959	2226
chr9	109936959	109936960	2206
chr9	109936960	109936961	2176
chr9	109936961	109936962	2185
chr9	109936962	109936963	2210
chr9	109936963	109936964	2236
chr9	109936964	109936965	2260
chr9	109936965	109936966	2291
chr9	109936966	109936967	2264
chr9	109936967	109936968	2214
chr9	109936968	109936969	2209
chr9	109936969	109936970	2194
chr9	109936970	109936971	2181
chr9	109936971	109936972	2194
chr9	109936972	109936973	2250
chr9	109936973	109936974	2225
chr9	109936974	109936975	2218
chr9	109936975	109936976	2186
chr9	109936976	109936977	2143
chr9	109936977	109936978	2113
chr9	109936978	109936979	2115
chr9	109936979	109936980	2130
chr9	109936980	109936981	2068
chr9	109936981	109936982	2043
chr9	109936982	109936983	2033
chr9	109936983	109936984	2006
chr9	109936984	109936985	2029
chr9	109936985	109936986	2053
chr9	109936986	109936987	2045
chr9	109936987	109936988	2048
chr9	109936988	109936989	2035
chr9	109936989	109936990	2028
chr9	109936990	109936991	2019
chr9	109936991	109936992	2004
chr9	109936992	109936993	2042
chr9	109936993	109936994	2064
chr9	109936994	109936995	2103
chr9	109936995	109936996	2097
chr9	109936996	109936997	2052
chr9	109936997	109936998	2078
chr9	109936998	109936999	2040
chr9	109936999	109937000	2120
chr9	109937000	109937001	2128
chr9	109937001	109937002	2171
chr9	109937002	109937003	2166
chr9	109937003	109937005	2259
chr9	109937005	109937006	2257
chr9	109937006	109937007	2268
chr9	109937007	109937008	2250
chr9	109937008	109937009	2251
chr9	109937009	109937010	2245
chr9	109937010	109937011	2295
chr9	109937011	109937012	2321
chr9	109937012	109937013	2330
chr9	109937013	109937014	2278
chr9	109937014	109937015	2216
chr9	109937015	109937016	2206
chr9	109937016	109937017	2230
chr9	109937017	109937019	2225
chr9	109937019	109937020	2121
chr9	109937020	109937021	2097
chr9	109937021	109937022	2066
chr9	109937022	109937023	2054
chr9	109937023	109937024	2097
chr9	109937024	109937025	2079
chr9	109937025	109937026	2049
chr9	109937026	109937027	2024
chr9	109937027	109937029	2021
chr9	109937029	109937030	2063
chr9	109937030	109937031	2064
chr9	109937031	109937032	2053
chr9	109937032	109937033	2077
chr9	109937033	109937034	2069
chr9	109937034	109937035	2076
chr9	109937035	109937036	2073
chr9	109937036	109937037	2137
chr9	109937037	109937038	2142
chr9	109937038	109937039	2153
chr9	109937039	109937040	2212
chr9	109937040	109937041	2224
chr9	109937041	109937042	2282
chr9	109937042	109937043	2294
chr9	109937043	109937044	2321
chr9	109937044	109937045	2298
chr9	109937045	109937046	2388
chr9	109937046	109937047	2412
chr9	109937047	109937048	2490
chr9	109937048	109937049	2495
chr9	109937049	109937050	2484
chr9	109937050	109937051	2480
chr9	109937051	109937052	2532
chr9	109937052	109937053	2554
chr9	109937053	109937054	2558
chr9	109937054	109937055	2569
chr9	109937055	109937056	2537
chr9	109937056	109937057	2531
chr9	109937057	109937058	2500
chr9	109937058	109937059	2498
chr9	109937059	109937060	2497
chr9	109937060	109937061	2558
chr9	109937061	109937062	2589
chr9	109937062	109937063	2592
chr9	109937063	109937064	2563
chr9	109937064	109937065	2544
chr9	109937065	109937066	2512
chr9	109937066	109937067	2578
chr9	109937067	109937068	2530
chr9	109937068	109937069	2517
chr9	109937069	109937071	2554
chr9	109937071	109937072	2523
chr9	109937072	109937073	2469
chr9	109937073	109937074	2537
chr9	109937074	109937075	2541
chr9	109937075	109937076	2546
chr9	109937076	109937077	2560
chr9	109937077	109937078	2580
chr9	109937078	109937079	2597
chr9	109937079	109937080	2584
chr9	109937080	109937081	2578
chr9	109937081	109937082	2586
chr9	109937082	109937083	2594
chr9	109937083	109937084	2609
chr9	109937084	109937085	2594
chr9	109937085	109937086	2569
chr9	109937086	109937087	2594
chr9	109937087	109937088	2612
chr9	109937088	109937089	2609
chr9	109937089	109937090	2700
chr9	109937090	109937091	2712
chr9	109937091	109937092	2697
chr9	109937092	109937093	2658
chr9	109937093	109937094	2664
chr9	109937094	109937095	2641
chr9	109937095	109937096	2642
chr9	109937096	109937097	2645
chr9	109937097	109937098	2615
chr9	109937098	109937099	2623
chr9	109937099	109937100	2593
chr9	109937100	109937101	2635
chr9	109937101	109937102	2595
chr9	109937102	109937103	2590
chr9	109937103	109937104	2499
chr9	109937104	109937105	2516
chr9	109937105	109937106	2539
chr9	109937106	109937107	2524
chr9	109937107	109937108	2543
chr9	109937108	109937109	2541
chr9	109937109	109937110	2523
chr9	109937110	109937111	2461
chr9	109937111	109937112	2464
chr9	109937112	109937113	2457
chr9	109937113	109937114	2479
chr9	109937114	109937115	2488
chr9	109937115	109937116	2561
chr9	109937116	109937117	2529
chr9	109937117	109937118	2508
chr9	109937118	109937119	2528
chr9	109937119	109937120	2488
chr9	109937120	109937121	2519
chr9	109937121	109937122	2506
chr9	109937122	109937123	2517
chr9	109937123	109937124	2480
chr9	109937124	109937125	2468
chr9	109937125	109937126	2582
chr9	109937126	109937127	2604
chr9	109937127	109937128	2681
chr9	109937128	109937129	2692
chr9	109937129	109937130	2685
chr9	109937130	109937131	2696
chr9	109937131	109937132	2753
chr9	109937132	109937133	2743
chr9	109937133	109937134	2754
chr9	109937134	109937135	2753
chr9	109937135	109937136	2775
chr9	109937136	109937137	2729
chr9	109937137	109937138	2730
chr9	109937138	109937139	2734
chr9	109937139	109937140	2703
chr9	109937140	109937141	2725
chr9	109937141	109937142	2699
chr9	109937142	109937143	2685
chr9	109937143	109937144	2720
chr9	109937144	109937145	2725
chr9	109937145	109937146	2642
chr9	109937146	109937147	2616
chr9	109937147	109937148	2554
chr9	109937148	109937149	2623
chr9	109937149	109937150	2629
chr9	109937150	109937151	2685
chr9	109937151	109937152	2617
chr9	109937152	109937153	2596
chr9	109937153	109937154	2600
chr9	109937154	109937155	2625
chr9	109937155	109937156	2622
chr9	109937156	109937157	2619
chr9	109937157	109937158	2609
chr9	109937158	109937159	2614
chr9	109937159	109937160	2615
chr9	109937160	109937161	2555
chr9	109937161	109937162	2521
chr9	109937162	109937163	2506
chr9	109937163	109937164	2497
chr9	109937164	109937165	2490
chr9	109937165	109937166	2496
chr9	109937166	109937167	2431
chr9	109937167	109937168	2498
chr9	109937168	109937169	2501
chr9	109937169	109937170	2465
chr9	109937170	109937171	2462
chr9	109937171	109937172	2450
chr9	109937172	109937173	2459
chr9	109937173	109937174	2406
chr9	109937174	109937175	2438
chr9	109937175	109937176	2439
chr9	109937176	109937177	2445
chr9	109937177	109937178	2494
chr9	109937178	109937179	2488
chr9	109937179	109937180	2490
chr9	109937180	109937181	2522
chr9	109937181	109937182	2533
chr9	109937182	109937183	2645
chr9	109937183	109937184	2642
chr9	109937184	109937185	2638
chr9	109937185	109937186	2645
chr9	109937186	109937187	2636
chr9	109937187	109937188	2612
chr9	109937188	109937189	2618
chr9	109937189	109937190	2620
chr9	109937190	109937191	2629
chr9	109937191	109937192	2876
chr9	109937192	109937193	2885
chr9	109937193	109937194	2862
chr9	109937194	109937195	2853
chr9	109937195	109937196	2863
chr9	109937196	109937198	2866
chr9	109937198	109937199	2856
chr9	109937199	109937200	2812
chr9	109937200	109937201	2763
chr9	109937201	109937202	2843
chr9	109937202	109937203	2880
chr9	109937203	109937204	2881
chr9	109937204	109937205	2857
chr9	109937205	109937206	2828
chr9	109937206	109937207	2826
chr9	109937207	109937208	2838
chr9	109937208	109937209	2831
chr9	109937209	109937210	2868
chr9	109937210	109937211	2862
chr9	109937211	109937212	2864
chr9	109937212	109937213	2856
chr9	109937213	109937214	2847
chr9	109937214	109937215	2836
chr9	109937215	109937216	2753
chr9	109937216	109937217	2758
chr9	109937217	109937218	2741
chr9	109937218	109937219	2720
chr9	109937219	109937220	2708
chr9	109937220	109937221	2733
chr9	109937221	109937222	2706
chr9	109937222	109937223	2677
chr9	109937223	109937224	2690
chr9	109937224	109937225	2683
chr9	109937225	109937226	2571
chr9	109937226	109937227	2536
chr9	109937227	109937228	2460
chr9	109937228	109937229	2454
chr9	109937229	109937230	2431
chr9	109937230	109937231	2409
chr9	109937231	109937232	2353
chr9	109937232	109937233	2319
chr9	109937233	109937234	2324
chr9	109937234	109937235	2303
chr9	109937235	109937236	2261
chr9	109937236	109937238	2248
chr9	109937238	109937239	2265
chr9	109937239	109937240	2335
chr9	109937240	109937241	2317
chr9	109937241	109937242	2285
chr9	109937242	109937243	2278
chr9	109937243	109937244	2265
chr9	109937244	109937245	2271
chr9	109937245	109937246	2273
chr9	109937246	109937247	2286
chr9	109937247	109937248	2258
chr9	109937248	109937249	2192
chr9	109937249	109937250	2201
chr9	109937250	109937251	2162
chr9	109937251	109937252	2177
chr9	109937252	109937253	2173
chr9	109937253	109937254	2214
chr9	109937254	109937255	2204
chr9	109937255	109937256	2278
chr9	109937256	109937257	2365
chr9	109937257	109937258	2390
chr9	109937258	109937261	2388
chr9	109937261	109937262	2385
chr9	109937262	109937263	2421
chr9	109937263	109937264	2426
chr9	109937264	109937265	2443
chr9	109937265	109937266	2420
chr9	109937266	109937267	2418
chr9	109937267	109937268	2347
chr9	109937268	109937269	2356
chr9	109937269	109937270	2384
chr9	109937270	109937271	2386
chr9	109937271	109937272	2388
chr9	109937272	109937273	2378
chr9	109937273	109937274	2361
chr9	109937274	109937275	2338
chr9	109937275	109937276	2365
chr9	109937276	109937277	2349
chr9	109937277	109937278	2284
chr9	109937278	109937279	2277
chr9	109937279	109937280	2295
chr9	109937280	109937281	2278
chr9	109937281	109937282	2298
chr9	109937282	109937283	2197
chr9	109937283	109937284	2187
chr9	109937284	109937285	2195
chr9	109937285	109937286	2395
chr9	109937286	109937287	2383
chr9	109937287	109937288	2411
chr9	109937288	109937289	2416
chr9	109937289	109937290	2343
chr9	109937290	109937291	2338
chr9	109937291	109937292	2094
chr9	109937292	109937293	2097
chr9	109937293	109937294	2093
chr9	109937294	109937295	2092
chr9	109937295	109937296	2083
chr9	109937296	109937297	2082
chr9	109937297	109937299	2108
chr9	109937299	109937300	2121
chr9	109937300	109937301	2155
chr9	109937301	109937302	2066
chr9	109937302	109937303	2034
chr9	109937303	109937304	2023
chr9	109937304	109937305	2033
chr9	109937305	109937306	2023
chr9	109937306	109937307	2026
chr9	109937307	109937308	1980
chr9	109937308	109937309	1981
chr9	109937309	109937310	1945
chr9	109937310	109937311	1950
chr9	109937311	109937312	1911
chr9	109937312	109937313	1906
chr9	109937313	109937314	1878
chr9	109937314	109937315	1869
chr9	109937315	109937316	1871
chr9	109937316	109937317	1869
chr9	109937317	109937318	1865
chr9	109937318	109937319	1855
chr9	109937319	109937320	1843
chr9	109937320	109937321	1795
chr9	109937321	109937322	1831
chr9	109937322	109937323	1834
chr9	109937323	109937324	1839
chr9	109937324	109937325	1835
chr9	109937325	109937326	1840
chr9	109937326	109937327	1837
chr9	109937327	109937328	1842
chr9	109937328	109937329	1844
chr9	109937329	109937331	1823
chr9	109937331	109937332	1827
chr9	109937332	109937333	1839
chr9	109937333	109937334	1866
chr9	109937334	109937335	1868
chr9	109937335	109937336	1890
chr9	109937336	109937337	1885
chr9	109937337	109937338	1917
chr9	109937338	109937339	1937
chr9	109937339	109937340	1847
chr9	109937340	109937341	1830
chr9	109937341	109937342	1844
chr9	109937342	109937343	1845
chr9	109937343	109937344	1800
chr9	109937344	109937345	1796
chr9	109937345	109937346	1809
chr9	109937346	109937347	1799
chr9	109937347	109937348	1795
chr9	109937348	109937349	1800
chr9	109937349	109937350	1813
chr9	109937350	109937351	1883
chr9	109937351	109937352	1882
chr9	109937352	109937353	1892
chr9	109937353	109937354	1851
chr9	109937354	109937355	1855
chr9	109937355	109937357	1817
chr9	109937357	109937358	1807
chr9	109937358	109937359	1802
chr9	109937359	109937360	1856
chr9	109937360	109937361	1859
chr9	109937361	109937362	1861
chr9	109937362	109937363	1827
chr9	109937363	109937364	1844
chr9	109937364	109937365	1839
chr9	109937365	109937366	1840
chr9	109937366	109937367	1855
chr9	109937367	109937368	1867
chr9	109937368	109937369	1865
chr9	109937369	109937370	1879
chr9	109937370	109937371	1888
chr9	109937371	109937372	1895
chr9	109937372	109937373	1899
chr9	109937373	109937374	1910
chr9	109937374	109937375	1939
chr9	109937375	109937376	1940
chr9	109937376	109937377	1945
chr9	109937377	109937378	1944
chr9	109937378	109937379	1940
chr9	109937379	109937380	1926
chr9	109937380	109937381	1959
chr9	109937381	109937382	1936
chr9	109937382	109937383	1910
chr9	109937383	109937384	1914
chr9	109937384	109937385	1932
chr9	109937385	109937386	1740
chr9	109937386	109937387	1744
chr9	109937387	109937388	1720
chr9	109937388	109937389	1726
chr9	109937389	109937390	1707
chr9	109937390	109937391	1711
chr9	109937391	109937392	1712
chr9	109937392	109937393	1709
chr9	109937393	109937394	1728
chr9	109937394	109937395	1721
chr9	109937395	109937396	1742
chr9	109937396	109937397	1762
chr9	109937397	109937398	1736
chr9	109937398	109937399	1750
chr9	109937399	109937400	1784
chr9	109937400	109937401	1757
chr9	109937401	109937402	1798
chr9	109937402	109937403	1830
chr9	109937403	109937404	1900
chr9	109937404	109937405	1893
chr9	109937405	109937406	1915
chr9	109937406	109937407	1921
chr9	109937407	109937408	1918
chr9	109937408	109937409	1931
chr9	109937409	109937410	1937
chr9	109937410	109937411	1948
chr9	109937411	109937412	1955
chr9	109937412	109937413	1964
chr9	109937413	109937414	1961
chr9	109937414	109937415	1963
chr9	109937415	109937416	1971
chr9	109937416	109937417	1989
chr9	109937417	109937418	2048
chr9	109937418	109937419	2063
chr9	109937419	109937420	2080
chr9	109937420	109937421	2075
chr9	109937421	109937422	2056
chr9	109937422	109937423	2069
chr9	109937423	109937424	2045
chr9	109937424	109937425	2038
chr9	109937425	109937426	2030
chr9	109937426	109937427	2036
chr9	109937427	109937428	2043
chr9	109937428	109937429	2063
chr9	109937429	109937430	2081
chr9	109937430	109937431	2086
chr9	109937431	109937432	2069
chr9	109937432	109937433	2061
chr9	109937433	109937434	2019
chr9	109937434	109937435	2150
chr9	109937435	109937436	2140
chr9	109937436	109937437	2144
chr9	109937437	109937438	2116
chr9	109937438	109937439	2099
chr9	109937439	109937440	2079
chr9	109937440	109937441	2110
chr9	109937441	109937442	2114
chr9	109937442	109937443	2110
chr9	109937443	109937444	2103
chr9	109937444	109937445	2122
chr9	109937445	109937446	2121
chr9	109937446	109937447	2118
chr9	109937447	109937448	2129
chr9	109937448	109937449	2122
chr9	109937449	109937450	2100
chr9	109937450	109937451	2004
chr9	109937451	109937452	1993
chr9	109937452	109937453	2028
chr9	109937453	109937454	2030
chr9	109937454	109937455	2008
chr9	109937455	109937456	1977
chr9	109937456	109937457	1905
chr9	109937457	109937458	1897
chr9	109937458	109937459	1932
chr9	109937459	109937460	1879
chr9	109937460	109937461	1878
chr9	109937461	109937462	1873
chr9	109937462	109937463	1924
chr9	109937463	109937464	1919
chr9	109937464	109937465	1911
chr9	109937465	109937466	1907
chr9	109937466	109937467	1905
chr9	109937467	109937468	1902
chr9	109937468	109937469	1897
chr9	109937469	109937470	1894
chr9	109937470	109937471	1901
chr9	109937471	109937472	1896
chr9	109937472	109937473	1904
chr9	109937473	109937474	1909
chr9	109937474	109937475	2033
chr9	109937475	109937476	1997
chr9	109937476	109937477	2015
chr9	109937477	109937478	2033
chr9	109937478	109937479	2029
chr9	109937479	109937480	2020
chr9	109937480	109937481	1974
chr9	109937481	109937482	1982
chr9	109937482	109937483	2090
chr9	109937483	109937484	2097
chr9	109937484	109937485	2075
chr9	109937485	109937486	2066
chr9	109937486	109937487	2099
chr9	109937487	109937488	2209
chr9	109937488	109937489	2206
chr9	109937489	109937490	2212
chr9	109937490	109937491	2185
chr9	109937491	109937492	2204
chr9	109937492	109937493	2226
chr9	109937493	109937494	2209
chr9	109937494	109937495	2233
chr9	109937495	109937496	2207
chr9	109937496	109937497	2189
chr9	109937497	109937498	2204
chr9	109937498	109937499	2219
chr9	109937499	109937500	2175
chr9	109937500	109937501	2168
chr9	109937501	109937502	2134
chr9	109937502	109937503	2099
chr9	109937503	109937504	2036
chr9	109937504	109937505	2046
chr9	109937505	109937506	2103
chr9	109937506	109937507	2179
chr9	109937507	109937508	2180
chr9	109937508	109937509	2169
chr9	109937509	109937510	2194
chr9	109937510	109937511	2180
chr9	109937511	109937512	2177
chr9	109937512	109937513	2180
chr9	109937513	109937514	2193
chr9	109937514	109937515	2199
chr9	109937515	109937516	2182
chr9	109937516	109937517	2174
chr9	109937517	109937518	2118
chr9	109937518	109937519	2131
chr9	109937519	109937520	2117
chr9	109937520	109937521	2115
chr9	109937521	109937522	2099
chr9	109937522	109937523	2088
chr9	109937523	109937524	2095
chr9	109937524	109937525	2141
chr9	109937525	109937526	2149
chr9	109937526	109937527	2147
chr9	109937527	109937528	2131
chr9	109937528	109937529	2155
chr9	109937529	109937530	2174
chr9	109937530	109937531	2169
chr9	109937531	109937532	2172
chr9	109937532	109937533	2163
chr9	109937533	109937534	2164
chr9	109937534	109937535	2030
chr9	109937535	109937536	2018
chr9	109937536	109937537	2022
chr9	109937537	109937538	2014
chr9	109937538	109937539	1989
chr9	109937539	109937540	1982
chr9	109937540	109937541	1963
chr9	109937541	109937542	1954
chr9	109937542	109937543	1970
chr9	109937543	109937544	1975
chr9	109937544	109937545	1956
chr9	109937545	109937546	1939
chr9	109937546	109937547	2019
chr9	109937547	109937548	2014
chr9	109937548	109937549	2029
chr9	109937549	109937551	2025
chr9	109937551	109937552	2054
chr9	109937552	109937553	2024
chr9	109937553	109937554	2016
chr9	109937554	109937555	2019
chr9	109937555	109937556	2015
chr9	109937556	109937557	1996
chr9	109937557	109937558	1990
chr9	109937558	109937559	1959
chr9	109937559	109937560	1983
chr9	109937560	109937561	2019
chr9	109937561	109937562	2022
chr9	109937562	109937563	1953
chr9	109937563	109937565	1933
chr9	109937565	109937566	1949
chr9	109937566	109937567	2065
chr9	109937567	109937568	2060
chr9	109937568	109937569	2061
chr9	109937569	109937570	2037
chr9	109937570	109937571	2059
chr9	109937571	109937572	2066
chr9	109937572	109937573	2058
chr9	109937573	109937574	2055
chr9	109937574	109937575	1899
chr9	109937575	109937576	1917
chr9	109937576	109937577	1981
chr9	109937577	109937578	1987
chr9	109937578	109937579	1992
chr9	109937579	109937580	1997
chr9	109937580	109937581	2035
chr9	109937581	109937582	2016
chr9	109937582	109937583	1950
chr9	109937583	109937584	1956
chr9	109937584	109937585	1958
chr9	109937585	109937586	1959
chr9	109937586	109937587	1924
chr9	109937587	109937588	1819
chr9	109937588	109937589	1839
chr9	109937589	109937590	1852
chr9	109937590	109937591	1889
chr9	109937591	109937592	1867
chr9	109937592	109937593	1851
chr9	109937593	109937594	1881
chr9	109937594	109937596	1877
chr9	109937596	109937597	1888
chr9	109937597	109937598	1883
chr9	109937598	109937599	1857
chr9	109937599	109937600	1846
chr9	109937600	109937601	1866
chr9	109937601	109937602	1854
chr9	109937602	109937603	1875
chr9	109937603	109937604	1898
chr9	109937604	109937605	1892
chr9	109937605	109937606	1812
chr9	109937606	109937607	1741
chr9	109937607	109937608	1738
chr9	109937608	109937609	1775
chr9	109937609	109937610	1742
chr9	109937610	109937611	1755
chr9	109937611	109937612	1769
chr9	109937612	109937613	1816
chr9	109937613	109937614	1809
chr9	109937614	109937615	1801
chr9	109937615	109937616	1799
chr9	109937616	109937617	1794
chr9	109937617	109937618	1786
chr9	109937618	109937619	1774
chr9	109937619	109937620	1769
chr9	109937620	109937621	1799
chr9	109937621	109937622	1802
chr9	109937622	109937623	1806
chr9	109937623	109937624	1795
chr9	109937624	109937625	1778
chr9	109937625	109937626	1787
chr9	109937626	109937627	1803
chr9	109937627	109937628	1797
chr9	109937628	109937629	1743
chr9	109937629	109937630	1707
chr9	109937630	109937631	1758
chr9	109937631	109937632	1760
chr9	109937632	109937633	1759
chr9	109937633	109937634	1760
chr9	109937634	109937635	1757
chr9	109937635	109937636	1804
chr9	109937636	109937637	1797
chr9	109937637	109937638	1819
chr9	109937638	109937639	1818
chr9	109937639	109937640	1816
chr9	109937640	109937641	1802
chr9	109937641	109937642	1799
chr9	109937642	109937643	1787
chr9	109937643	109937644	1809
chr9	109937644	109937645	1829
chr9	109937645	109937646	1827
chr9	109937646	109937647	1742
chr9	109937647	109937648	1731
chr9	109937648	109937649	1713
chr9	109937649	109937651	1744
chr9	109937651	109937652	1712
chr9	109937652	109937653	1693
chr9	109937653	109937654	1696
chr9	109937654	109937655	1759
chr9	109937655	109937656	1828
chr9	109937656	109937657	1835
chr9	109937657	109937658	1837
chr9	109937658	109937659	1833
chr9	109937659	109937660	1850
chr9	109937660	109937661	1817
chr9	109937661	109937662	1815
chr9	109937662	109937663	1842
chr9	109937663	109937664	1868
chr9	109937664	109937665	1897
chr9	109937665	109937666	1907
chr9	109937666	109937667	1904
chr9	109937667	109937668	1925
chr9	109937668	109937669	1926
chr9	109937669	109937670	1928
chr9	109937670	109937671	1918
chr9	109937671	109937672	1913
chr9	109937672	109937673	2021
chr9	109937673	109937674	2022
chr9	109937674	109937675	2017
chr9	109937675	109937676	2003
chr9	109937676	109937677	1915
chr9	109937677	109937678	1904
chr9	109937678	109937679	1928
chr9	109937679	109937680	1926
chr9	109937680	109937681	1912
chr9	109937681	109937682	1927
chr9	109937682	109937683	1898
chr9	109937683	109937684	1881
chr9	109937684	109937685	1877
chr9	109937685	109937686	1881
chr9	109937686	109937687	1985
chr9	109937687	109937688	2022
chr9	109937688	109937689	2005
chr9	109937689	109937690	2006
chr9	109937690	109937691	1980
chr9	109937691	109937692	1983
chr9	109937692	109937693	2006
chr9	109937693	109937694	1976
chr9	109937694	109937695	1956
chr9	109937695	109937696	1958
chr9	109937696	109937697	1957
chr9	109937697	109937698	1953
chr9	109937698	109937699	1951
chr9	109937699	109937700	1954
chr9	109937700	109937701	1939
chr9	109937701	109937702	1960
chr9	109937702	109937703	1946
chr9	109937703	109937704	1949
chr9	109937704	109937705	1935
chr9	109937705	109937706	1943
chr9	109937706	109937707	1932
chr9	109937707	109937708	1933
chr9	109937708	109937709	1918
chr9	109937709	109937710	1936
chr9	109937710	109937711	1939
chr9	109937711	109937712	1925
chr9	109937712	109937713	1865
chr9	109937713	109937714	1860
chr9	109937714	109937715	2032
chr9	109937715	109937716	2037
chr9	109937716	109937717	2035
chr9	109937717	109937718	2033
chr9	109937718	109937719	2019
chr9	109937719	109937720	2043
chr9	109937720	109937721	2016
chr9	109937721	109937722	2015
chr9	109937722	109937723	2013
chr9	109937723	109937724	2015
chr9	109937724	109937725	1984
chr9	109937725	109937726	1967
chr9	109937726	109937727	1957
chr9	109937727	109937728	1954
chr9	109937728	109937729	1953
chr9	109937729	109937730	1954
chr9	109937730	109937731	1909
chr9	109937731	109937732	1898
chr9	109937732	109937733	1908
chr9	109937733	109937734	1953
chr9	109937734	109937735	1955
chr9	109937735	109937736	1911
chr9	109937736	109937737	1902
chr9	109937737	109937738	1879
chr9	109937738	109937739	1880
chr9	109937739	109937740	1901
chr9	109937740	109937741	1914
chr9	109937741	109937742	1910
chr9	109937742	109937743	1905
chr9	109937743	109937744	1985
chr9	109937744	109937745	1987
chr9	109937745	109937746	1985
chr9	109937746	109937747	1997
chr9	109937747	109937748	2005
chr9	109937748	109937749	2026
chr9	109937749	109937750	1993
chr9	109937750	109937751	2057
chr9	109937751	109937752	2081
chr9	109937752	109937753	2145
chr9	109937753	109937754	2164
chr9	109937754	109937755	2092
chr9	109937755	109937756	2026
chr9	109937756	109937757	2070
chr9	109937757	109937758	2083
chr9	109937758	109937759	2080
chr9	109937759	109937760	2063
chr9	109937760	109937761	2057
chr9	109937761	109937762	2049
chr9	109937762	109937763	2048
chr9	109937763	109937764	2072
chr9	109937764	109937765	2151
chr9	109937765	109937766	2125
chr9	109937766	109937767	2010
chr9	109937767	109937768	1986
chr9	109937768	109937769	1987
chr9	109937769	109937770	1993
chr9	109937770	109937771	2073
chr9	109937771	109937772	2178
chr9	109937772	109937773	2079
chr9	109937773	109937774	2068
chr9	109937774	109937775	2107
chr9	109937775	109937776	2112
chr9	109937776	109937777	2150
chr9	109937777	109937778	2157
chr9	109937778	109937779	2130
chr9	109937779	109937780	2151
chr9	109937780	109937781	2138
chr9	109937781	109937782	2128
chr9	109937782	109937783	2185
chr9	109937783	109937784	2187
chr9	109937784	109937785	2212
chr9	109937785	109937786	2207
chr9	109937786	109937787	2124
chr9	109937787	109937788	2084
chr9	109937788	109937789	2069
chr9	109937789	109937790	2057
chr9	109937790	109937791	2063
chr9	109937791	109937792	2068
chr9	109937792	109937793	2062
chr9	109937793	109937794	2063
chr9	109937794	109937795	2069
chr9	109937795	109937796	2067
chr9	109937796	109937797	2042
chr9	109937797	109937798	2036
chr9	109937798	109937799	2062
chr9	109937799	109937800	2071
chr9	109937800	109937801	2116
chr9	109937801	109937802	2089
chr9	109937802	109937803	2082
chr9	109937803	109937804	2053
chr9	109937804	109937805	2100
chr9	109937805	109937806	2208
chr9	109937806	109937807	2207
chr9	109937807	109937808	2213
chr9	109937808	109937809	2186
chr9	109937809	109937810	2170
chr9	109937810	109937811	2173
chr9	109937811	109937812	2178
chr9	109937812	109937813	2292
chr9	109937813	109937814	2295
chr9	109937814	109937815	2150
chr9	109937815	109937816	2187
chr9	109937816	109937817	2178
chr9	109937817	109937818	2183
chr9	109937818	109937819	2189
chr9	109937819	109937820	2177
chr9	109937820	109937821	2182
chr9	109937821	109937822	2191
chr9	109937822	109937823	2198
chr9	109937823	109937824	2195
chr9	109937824	109937825	2207
chr9	109937825	109937826	2204
chr9	109937826	109937827	2193
chr9	109937827	109937828	2202
chr9	109937828	109937829	2197
chr9	109937829	109937830	2318
chr9	109937830	109937831	2322
chr9	109937831	109937832	2343
chr9	109937832	109937833	2340
chr9	109937833	109937834	2305
chr9	109937834	109937835	2353
chr9	109937835	109937836	2418
chr9	109937836	109937837	2422
chr9	109937837	109937839	2433
chr9	109937839	109937840	2424
chr9	109937840	109937841	2467
chr9	109937841	109937842	2477
chr9	109937842	109937843	2478
chr9	109937843	109937844	2389
chr9	109937844	109937845	2460
chr9	109937845	109937846	2500
chr9	109937846	109937847	2514
chr9	109937847	109937848	2526
chr9	109937848	109937849	2520
chr9	109937849	109937850	2609
chr9	109937850	109937851	2560
chr9	109937851	109937852	2564
chr9	109937852	109937853	2553
chr9	109937853	109937854	2531
chr9	109937854	109937855	2555
chr9	109937855	109937856	2566
chr9	109937856	109937857	2525
chr9	109937857	109937858	2513
chr9	109937858	109937859	2518
chr9	109937859	109937860	2534
chr9	109937860	109937861	2543
chr9	109937861	109937862	2544
chr9	109937862	109937863	2522
chr9	109937863	109937864	2480
chr9	109937864	109937866	2372
chr9	109937866	109937867	2371
chr9	109937867	109937868	2376
chr9	109937868	109937869	2373
chr9	109937869	109937870	2352
chr9	109937870	109937871	2258
chr9	109937871	109937872	2152
chr9	109937872	109937873	2167
chr9	109937873	109937874	2170
chr9	109937874	109937875	2163
chr9	109937875	109937876	2166
chr9	109937876	109937877	2129
chr9	109937877	109937878	2108
chr9	109937878	109937879	2110
chr9	109937879	109937881	2095
chr9	109937881	109937882	2089
chr9	109937882	109937883	2052
chr9	109937883	109937884	2049
chr9	109937884	109937885	2117
chr9	109937885	109937886	2128
chr9	109937886	109937887	2115
chr9	109937887	109937888	2116
chr9	109937888	109937890	2124
chr9	109937890	109937891	2115
chr9	109937891	109937892	2103
chr9	109937892	109937893	2072
chr9	109937893	109937894	2081
chr9	109937894	109937895	2086
chr9	109937895	109937896	2092
chr9	109937896	109937897	2172
chr9	109937897	109937898	2181
chr9	109937898	109937899	2152
chr9	109937899	109937900	2156
chr9	109937900	109937901	2133
chr9	109937901	109937902	2136
chr9	109937902	109937903	2155
chr9	109937903	109937904	2167
chr9	109937904	109937905	2131
chr9	109937905	109937906	2027
chr9	109937906	109937907	2039
chr9	109937907	109937908	2058
chr9	109937908	109937909	2072
chr9	109937909	109937911	2081
chr9	109937911	109937912	2091
chr9	109937912	109937913	1983
chr9	109937913	109937914	2035
chr9	109937914	109937915	2009
chr9	109937915	109937916	1967
chr9	109937916	109937917	2008
chr9	109937917	109937918	2029
chr9	109937918	109937919	2038
chr9	109937919	109937920	2039
chr9	109937920	109937921	2048
chr9	109937921	109937922	2080
chr9	109937922	109937923	2157
chr9	109937923	109937924	2165
chr9	109937924	109937925	2157
chr9	109937925	109937926	2167
chr9	109937926	109937927	2271
chr9	109937927	109937928	2308
chr9	109937928	109937929	2439
chr9	109937929	109937930	2337
chr9	109937930	109937931	2336
chr9	109937931	109937932	2335
chr9	109937932	109937933	2326
chr9	109937933	109937934	2330
chr9	109937934	109937935	2284
chr9	109937935	109937936	2246
chr9	109937936	109937937	2249
chr9	109937937	109937938	2248
chr9	109937938	109937939	2265
chr9	109937939	109937940	2277
chr9	109937940	109937941	2269
chr9	109937941	109937942	2280
chr9	109937942	109937943	2290
#bedGraph section chr9:109937943-109951993
chr9	109937943	109937944	2271
chr9	109937944	109937945	2167
chr9	109937945	109937946	2160
chr9	109937946	109937947	2142
chr9	109937947	109937948	2139
chr9	109937948	109937949	2146
chr9	109937949	109937950	2062
chr9	109937950	109937951	2052
chr9	109937951	109937952	2050
chr9	109937952	109937953	2025
chr9	109937953	109937954	2036
chr9	109937954	109937955	2026
chr9	109937955	109937956	2025
chr9	109937956	109937957	2045
chr9	109937957	109937958	2065
chr9	109937958	109937959	2063
chr9	109937959	109937960	2033
chr9	109937960	109937962	2030
chr9	109937962	109937963	2039
chr9	109937963	109937964	2063
chr9	109937964	109937965	2061
chr9	109937965	109937966	2088
chr9	109937966	109937967	2104
chr9	109937967	109937968	2097
chr9	109937968	109937969	2096
chr9	109937969	109937970	2100
chr9	109937970	109937971	2086
chr9	109937971	109937972	2084
chr9	109937972	109937973	2109
chr9	109937973	109937974	2128
chr9	109937974	109937975	2097
chr9	109937975	109937976	2083
chr9	109937976	109937977	2088
chr9	109937977	109937978	2098
chr9	109937978	109937979	2168
chr9	109937979	109937980	2166
chr9	109937980	109937981	2207
chr9	109937981	109937982	2214
chr9	109937982	109937983	2190
chr9	109937983	109937984	2197
chr9	109937984	109937985	2113
chr9	109937985	109937986	2120
chr9	109937986	109937988	2146
chr9	109937988	109937989	2186
chr9	109937989	109937990	2184
chr9	109937990	109937991	2183
chr9	109937991	109937992	2236
chr9	109937992	109937993	2292
chr9	109937993	109937994	2279
chr9	109937994	109937995	2275
chr9	109937995	109937996	2289
chr9	109937996	109937997	2290
chr9	109937997	109937998	2295
chr9	109937998	109937999	2314
chr9	109937999	109938000	2306
chr9	109938000	109938001	2276
chr9	109938001	109938002	2312
chr9	109938002	109938003	2296
chr9	109938003	109938004	2282
chr9	109938004	109938005	2275
chr9	109938005	109938006	2270
chr9	109938006	109938007	2252
chr9	109938007	109938008	2224
chr9	109938008	109938009	2205
chr9	109938009	109938010	2194
chr9	109938010	109938011	32

## Sheet: N_Myocyte 60h
track type=wiggle_0 name="C2C12 Myoc Raw" description="C2C12 Myocyte 60 h RNA-seq Raw Signal from ENCODE/Caltech"
#bedGraph section chr9:109928681-109937407
chr9	109936876	109936877	1779.5
chr9	109936877	109936878	1810.5
chr9	109936878	109936879	1808.5
chr9	109936879	109936880	1810
chr9	109936880	109936882	1874
chr9	109936882	109936883	1881
chr9	109936883	109936884	1890
chr9	109936884	109936885	1877
chr9	109936885	109936886	1867
chr9	109936886	109936887	1873
chr9	109936887	109936888	1843
chr9	109936888	109936889	1846
chr9	109936889	109936890	1842
chr9	109936890	109936891	1860
chr9	109936891	109936892	1902
chr9	109936892	109936893	1891
chr9	109936893	109936894	1873
chr9	109936894	109936895	1861
chr9	109936895	109936896	1863
chr9	109936896	109936897	1904
chr9	109936897	109936898	1895
chr9	109936898	109936899	1901
chr9	109936899	109936900	1844
chr9	109936900	109936901	1837
chr9	109936901	109936902	1810
chr9	109936902	109936903	1801
chr9	109936903	109936904	1804
chr9	109936904	109936905	1806
chr9	109936905	109936906	1773
chr9	109936906	109936907	1764
chr9	109936907	109936908	1766
chr9	109936908	109936909	1741
chr9	109936909	109936910	1774
chr9	109936910	109936911	1788
chr9	109936911	109936912	1784
chr9	109936912	109936913	1777
chr9	109936913	109936914	1821
chr9	109936914	109936915	1884
chr9	109936915	109936916	1916
chr9	109936916	109936917	1911
chr9	109936917	109936918	1944
chr9	109936918	109936919	1946
chr9	109936919	109936920	2042
chr9	109936920	109936921	2052
chr9	109936921	109936922	2115
chr9	109936922	109936923	2113
chr9	109936923	109936924	2118
chr9	109936924	109936925	2128
chr9	109936925	109936926	2167
chr9	109936926	109936927	2214
chr9	109936927	109936928	2235
chr9	109936928	109936929	2220
chr9	109936929	109936930	2213
chr9	109936930	109936931	2196
chr9	109936931	109936932	2221
chr9	109936932	109936933	2224
chr9	109936933	109936934	2225
chr9	109936934	109936935	2240
chr9	109936935	109936937	2265
chr9	109936937	109936938	2278
chr9	109936938	109936939	2251
chr9	109936939	109936940	2244
chr9	109936940	109936941	2238
chr9	109936941	109936942	2234
chr9	109936942	109936943	2243
chr9	109936943	109936944	2241
chr9	109936944	109936945	2259
chr9	109936945	109936946	2265
chr9	109936946	109936947	2261
chr9	109936947	109936948	2284
chr9	109936948	109936949	2269
chr9	109936949	109936950	2277
chr9	109936950	109936951	2298
chr9	109936951	109936952	2309
chr9	109936952	109936953	2283
chr9	109936953	109936954	2264
chr9	109936954	109936955	2261
chr9	109936955	109936956	2263
chr9	109936956	109936957	2266
chr9	109936957	109936958	2340
chr9	109936958	109936959	2349
chr9	109936959	109936960	2311
chr9	109936960	109936961	2287
chr9	109936961	109936962	2299
chr9	109936962	109936963	2314
chr9	109936963	109936964	2315
chr9	109936964	109936965	2355
chr9	109936965	109936966	2394
chr9	109936966	109936967	2379
chr9	109936967	109936968	2316
chr9	109936968	109936969	2314
chr9	109936969	109936970	2307
chr9	109936970	109936971	2306
chr9	109936971	109936972	2313
chr9	109936972	109936973	2390
chr9	109936973	109936974	2354
chr9	109936974	109936975	2356
chr9	109936975	109936976	2325
chr9	109936976	109936977	2279
chr9	109936977	109936978	2251
chr9	109936978	109936979	2263
chr9	109936979	109936980	2295
chr9	109936980	109936981	2233
chr9	109936981	109936982	2231
chr9	109936982	109936983	2233
chr9	109936983	109936984	2219
chr9	109936984	109936985	2234
chr9	109936985	109936986	2246
chr9	109936986	109936987	2251
chr9	109936987	109936988	2274
chr9	109936988	109936989	2272
chr9	109936989	109936990	2273
chr9	109936990	109936991	2271
chr9	109936991	109936992	2240
chr9	109936992	109936993	2291
chr9	109936993	109936994	2315
chr9	109936994	109936995	2356
chr9	109936995	109936996	2355
chr9	109936996	109936997	2307
chr9	109936997	109936998	2327
chr9	109936998	109936999	2323
chr9	109936999	109937000	2439
chr9	109937000	109937001	2446
chr9	109937001	109937002	2506
chr9	109937002	109937003	2481
chr9	109937003	109937004	2574
chr9	109937004	109937005	2568
chr9	109937005	109937006	2583
chr9	109937006	109937007	2572
chr9	109937007	109937008	2539
chr9	109937008	109937009	2546
chr9	109937009	109937010	2536
chr9	109937010	109937011	2572
chr9	109937011	109937012	2607
chr9	109937012	109937013	2625
chr9	109937013	109937014	2584
chr9	109937014	109937015	2520
chr9	109937015	109937016	2503
chr9	109937016	109937017	2512
chr9	109937017	109937018	2490
chr9	109937018	109937019	2487
chr9	109937019	109937020	2419
chr9	109937020	109937021	2417
chr9	109937021	109937022	2368
chr9	109937022	109937023	2369
chr9	109937023	109937024	2416
chr9	109937024	109937025	2379
chr9	109937025	109937026	2349
chr9	109937026	109937027	2309
chr9	109937027	109937028	2293
chr9	109937028	109937029	2300
chr9	109937029	109937030	2341
chr9	109937030	109937031	2351
chr9	109937031	109937032	2344
chr9	109937032	109937033	2384
chr9	109937033	109937034	2381
chr9	109937034	109937035	2387
chr9	109937035	109937036	2370
chr9	109937036	109937037	2428
chr9	109937037	109937038	2416
chr9	109937038	109937039	2421
chr9	109937039	109937040	2493
chr9	109937040	109937041	2502
chr9	109937041	109937042	2561
chr9	109937042	109937043	2579
chr9	109937043	109937044	2588
chr9	109937044	109937045	2570
chr9	109937045	109937046	2657
chr9	109937046	109937047	2688
chr9	109937047	109937048	2739
chr9	109937048	109937049	2754
chr9	109937049	109937050	2737
chr9	109937050	109937051	2717
chr9	109937051	109937052	2762
chr9	109937052	109937053	2786
chr9	109937053	109937054	2785
chr9	109937054	109937055	2783
chr9	109937055	109937056	2751
chr9	109937056	109937057	2744
chr9	109937057	109937058	2686
chr9	109937058	109937059	2677
chr9	109937059	109937060	2688
chr9	109937060	109937061	2773
chr9	109937061	109937062	2804
chr9	109937062	109937063	2836
chr9	109937063	109937064	2804
chr9	109937064	109937065	2769
chr9	109937065	109937066	2729
chr9	109937066	109937067	2792
chr9	109937067	109937068	2732
chr9	109937068	109937069	2731
chr9	109937069	109937070	2779
chr9	109937070	109937072	2775
chr9	109937072	109937073	2701
chr9	109937073	109937074	2774
chr9	109937074	109937075	2780
chr9	109937075	109937076	2811
chr9	109937076	109937077	2822
chr9	109937077	109937078	2837
chr9	109937078	109937079	2856
chr9	109937079	109937080	2823
chr9	109937080	109937081	2826
chr9	109937081	109937082	2822
chr9	109937082	109937083	2827
chr9	109937083	109937084	2829
chr9	109937084	109937085	2831
chr9	109937085	109937086	2814
chr9	109937086	109937087	2824
chr9	109937087	109937088	2855
chr9	109937088	109937089	2852
chr9	109937089	109937090	2980
chr9	109937090	109937091	2985
chr9	109937091	109937092	2969
chr9	109937092	109937093	2923
chr9	109937093	109937094	2949
chr9	109937094	109937095	2918
chr9	109937095	109937096	2914
chr9	109937096	109937097	2917
chr9	109937097	109937098	2891
chr9	109937098	109937099	2897
chr9	109937099	109937100	2822
chr9	109937100	109937101	2865
chr9	109937101	109937102	2819
chr9	109937102	109937103	2823
chr9	109937103	109937104	2738
chr9	109937104	109937105	2744
chr9	109937105	109937106	2747
chr9	109937106	109937107	2754
chr9	109937107	109937108	2798
chr9	109937108	109937109	2799
chr9	109937109	109937110	2776
chr9	109937110	109937111	2734
chr9	109937111	109937112	2751
chr9	109937112	109937113	2740
chr9	109937113	109937114	2764
chr9	109937114	109937115	2783
chr9	109937115	109937116	2848
chr9	109937116	109937117	2828
chr9	109937117	109937118	2823
chr9	109937118	109937119	2856
chr9	109937119	109937120	2819
chr9	109937120	109937121	2827
chr9	109937121	109937122	2840
chr9	109937122	109937123	2865
chr9	109937123	109937124	2821
chr9	109937124	109937125	2841
chr9	109937125	109937126	3039
chr9	109937126	109937127	3060
chr9	109937127	109937128	3176
chr9	109937128	109937129	3169
chr9	109937129	109937130	3216
chr9	109937130	109937131	3245
chr9	109937131	109937132	3333
chr9	109937132	109937133	3319
chr9	109937133	109937134	3337
chr9	109937134	109937135	3370
chr9	109937135	109937136	3397
chr9	109937136	109937137	3364
chr9	109937137	109937138	3371
chr9	109937138	109937139	3376
chr9	109937139	109937140	3323
chr9	109937140	109937141	3361
chr9	109937141	109937142	3348
chr9	109937142	109937143	3332
chr9	109937143	109937144	3407
chr9	109937144	109937145	3412
chr9	109937145	109937146	3330
chr9	109937146	109937147	3302
chr9	109937147	109937148	3292
chr9	109937148	109937149	3364
chr9	109937149	109937150	3381
chr9	109937150	109937151	3464
chr9	109937151	109937152	3416
chr9	109937152	109937153	3390
chr9	109937153	109937154	3399
chr9	109937154	109937155	3434
chr9	109937155	109937156	3430
chr9	109937156	109937157	3431
chr9	109937157	109937158	3415
chr9	109937158	109937159	3432
chr9	109937159	109937160	3427
chr9	109937160	109937161	3333
chr9	109937161	109937162	3316
chr9	109937162	109937163	3278
chr9	109937163	109937164	3281
chr9	109937164	109937165	3280
chr9	109937165	109937166	3303
chr9	109937166	109937167	3228
chr9	109937167	109937168	3326
chr9	109937168	109937169	3323
chr9	109937169	109937170	3277
chr9	109937170	109937171	3300.5
chr9	109937171	109937172	3260.5
chr9	109937172	109937173	3270.5
chr9	109937173	109937174	3210
chr9	109937174	109937175	3245
chr9	109937175	109937176	3243
chr9	109937176	109937177	3247
chr9	109937177	109937178	3318
chr9	109937178	109937179	3311
chr9	109937179	109937180	3321
chr9	109937180	109937181	3352
chr9	109937181	109937182	3374
chr9	109937182	109937183	3545
chr9	109937183	109937184	3555
chr9	109937184	109937185	3539
chr9	109937185	109937186	3547
chr9	109937186	109937187	3554
chr9	109937187	109937188	3497
chr9	109937188	109937189	3503
chr9	109937189	109937190	3487
chr9	109937190	109937191	3496
chr9	109937191	109937192	3813
chr9	109937192	109937193	3827
chr9	109937193	109937194	3789
chr9	109937194	109937195	3785
chr9	109937195	109937196	3818
chr9	109937196	109937197	3819
chr9	109937197	109937198	3822
chr9	109937198	109937199	3809
chr9	109937199	109937200	3785
chr9	109937200	109937201	3752
chr9	109937201	109937202	3837
chr9	109937202	109937203	3886
chr9	109937203	109937204	3884
chr9	109937204	109937205	3879
chr9	109937205	109937206	3850
chr9	109937206	109937207	3841
chr9	109937207	109937208	3931
chr9	109937208	109937209	3923
chr9	109937209	109937210	4000
chr9	109937210	109937211	3999
chr9	109937211	109937212	3978
chr9	109937212	109937213	3965
chr9	109937213	109937214	3986
chr9	109937214	109937215	3976
chr9	109937215	109937216	3911
chr9	109937216	109937217	3926
chr9	109937217	109937218	3923
chr9	109937218	109937219	3915
chr9	109937219	109937220	3905
chr9	109937220	109937221	3972
chr9	109937221	109937222	3933
chr9	109937222	109937223	3892
chr9	109937223	109937224	3890
chr9	109937224	109937225	3880
chr9	109937225	109937226	3682
chr9	109937226	109937227	3653
chr9	109937227	109937228	3552
chr9	109937228	109937229	3561
chr9	109937229	109937230	3488
chr9	109937230	109937231	3448
chr9	109937231	109937232	3353
chr9	109937232	109937233	3332
chr9	109937233	109937234	3330
chr9	109937234	109937235	3294
chr9	109937235	109937236	3245
chr9	109937236	109937237	3233
chr9	109937237	109937238	3245
chr9	109937238	109937239	3295
chr9	109937239	109937240	3365
chr9	109937240	109937241	3330
chr9	109937241	109937242	3286
chr9	109937242	109937243	3288
chr9	109937243	109937244	3262
chr9	109937244	109937245	3259
chr9	109937245	109937246	3249
chr9	109937246	109937247	3257
chr9	109937247	109937248	3192
chr9	109937248	109937249	3120
chr9	109937249	109937250	3123
chr9	109937250	109937252	3070
chr9	109937252	109937253	3067
chr9	109937253	109937254	3100
chr9	109937254	109937255	3098
chr9	109937255	109937256	3180
chr9	109937256	109937257	3276
chr9	109937257	109937258	3299
chr9	109937258	109937259	3285
chr9	109937259	109937260	3275
chr9	109937260	109937261	3284
chr9	109937261	109937262	3274
chr9	109937262	109937263	3314
chr9	109937263	109937264	3325
chr9	109937264	109937265	3347
chr9	109937265	109937266	3323
chr9	109937266	109937267	3324
chr9	109937267	109937268	3222
chr9	109937268	109937269	3242
chr9	109937269	109937270	3280
chr9	109937270	109937271	3271
chr9	109937271	109937272	3274
chr9	109937272	109937273	3262
chr9	109937273	109937274	3247
chr9	109937274	109937275	3208
chr9	109937275	109937276	3215
chr9	109937276	109937277	3200
chr9	109937277	109937278	3120
chr9	109937278	109937279	3108
chr9	109937279	109937280	3114
chr9	109937280	109937281	3096
chr9	109937281	109937282	3095
chr9	109937282	109937283	2951
chr9	109937283	109937284	2934
chr9	109937284	109937285	2942
chr9	109937285	109937286	3137
chr9	109937286	109937287	3108
chr9	109937287	109937288	3120
chr9	109937288	109937289	3119
chr9	109937289	109937290	3016
chr9	109937290	109937291	3008
chr9	109937291	109937293	2701
chr9	109937293	109937294	2687
chr9	109937294	109937295	2683
chr9	109937295	109937296	2658
chr9	109937296	109937297	2663
chr9	109937297	109937298	2683
chr9	109937298	109937299	2681
chr9	109937299	109937300	2672
chr9	109937300	109937301	2693
chr9	109937301	109937302	2583
chr9	109937302	109937303	2532
chr9	109937303	109937304	2514
chr9	109937304	109937305	2517
chr9	109937305	109937306	2502
chr9	109937306	109937307	2497
chr9	109937307	109937308	2359
chr9	109937308	109937309	2351
chr9	109937309	109937310	2274
chr9	109937310	109937311	2268
chr9	109937311	109937313	2229
chr9	109937313	109937314	2176
chr9	109937314	109937315	2160
chr9	109937315	109937316	2149
chr9	109937316	109937317	2137
chr9	109937317	109937318	2138
chr9	109937318	109937319	2110
chr9	109937319	109937320	2098
chr9	109937320	109937321	2021
chr9	109937321	109937322	2058
chr9	109937322	109937323	2064
chr9	109937323	109937324	2090
chr9	109937324	109937325	2080
chr9	109937325	109937326	2073
chr9	109937326	109937327	2070
chr9	109937327	109937328	2062
chr9	109937328	109937329	2073
chr9	109937329	109937330	2055
chr9	109937330	109937331	2057
chr9	109937331	109937332	2074
chr9	109937332	109937333	2090
chr9	109937333	109937334	2127
chr9	109937334	109937335	2114
chr9	109937335	109937336	2132
chr9	109937336	109937337	2124
chr9	109937337	109937338	2159
chr9	109937338	109937339	2151
chr9	109937339	109937340	2087
chr9	109937340	109937341	2084
chr9	109937341	109937342	2102
chr9	109937342	109937343	2097
chr9	109937343	109937344	2040
chr9	109937344	109937345	2044
chr9	109937345	109937346	2089
chr9	109937346	109937347	2086
chr9	109937347	109937348	2085
chr9	109937348	109937349	2078
chr9	109937349	109937350	2089
chr9	109937350	109937351	2162
chr9	109937351	109937352	2156
chr9	109937352	109937353	2163
chr9	109937353	109937354	2129
chr9	109937354	109937355	2107
chr9	109937355	109937356	2069
chr9	109937356	109937357	2049
chr9	109937357	109937358	2047
chr9	109937358	109937359	2037
chr9	109937359	109937360	2076
chr9	109937360	109937361	2081
chr9	109937361	109937362	2068
chr9	109937362	109937363	2034
chr9	109937363	109937364	2038
chr9	109937364	109937365	2040
chr9	109937365	109937366	2038
chr9	109937366	109937367	2067
chr9	109937367	109937368	2084
chr9	109937368	109937369	2082
chr9	109937369	109937370	2086
chr9	109937370	109937371	2100
chr9	109937371	109937372	2097
chr9	109937372	109937373	2101
chr9	109937373	109937374	2111
chr9	109937374	109937375	2155
chr9	109937375	109937376	2163
chr9	109937376	109937377	2165
chr9	109937377	109937378	2170
chr9	109937378	109937379	2161
chr9	109937379	109937380	2160
chr9	109937380	109937381	2196
chr9	109937381	109937382	2184
chr9	109937382	109937383	2147
chr9	109937383	109937384	2154
chr9	109937384	109937385	2178
chr9	109937385	109937386	1983
chr9	109937386	109937387	1992
chr9	109937387	109937388	1994
chr9	109937388	109937389	1997
chr9	109937389	109937390	1989
chr9	109937390	109937391	1992
chr9	109937391	109937392	1986
chr9	109937392	109937393	1977
chr9	109937393	109937394	2005
chr9	109937394	109937395	2002
chr9	109937395	109937396	2021
chr9	109937396	109937397	2054
chr9	109937397	109937398	2027
chr9	109937398	109937399	2053
chr9	109937399	109937400	2124
chr9	109937400	109937401	2097
chr9	109937401	109937402	2170
chr9	109937402	109937403	2210
chr9	109937403	109937404	2286
chr9	109937404	109937405	2292
chr9	109937405	109937406	2324
chr9	109937406	109937407	2329
#bedGraph section chr9:109937407-109940093
chr9	109937407	109937408	2327
chr9	109937408	109937409	2336
chr9	109937409	109937410	2368
chr9	109937410	109937411	2404
chr9	109937411	109937412	2429
chr9	109937412	109937413	2442
chr9	109937413	109937414	2444
chr9	109937414	109937415	2452
chr9	109937415	109937416	2463
chr9	109937416	109937417	2500
chr9	109937417	109937418	2528
chr9	109937418	109937419	2552
chr9	109937419	109937420	2569
chr9	109937420	109937421	2566
chr9	109937421	109937422	2546
chr9	109937422	109937423	2548
chr9	109937423	109937424	2522
chr9	109937424	109937425	2513
chr9	109937425	109937426	2528
chr9	109937426	109937427	2529
chr9	109937427	109937428	2543
chr9	109937428	109937429	2569
chr9	109937429	109937430	2591
chr9	109937430	109937431	2593
chr9	109937431	109937432	2569
chr9	109937432	109937433	2570
chr9	109937433	109937434	2526
chr9	109937434	109937435	2727
chr9	109937435	109937436	2736
chr9	109937436	109937437	2761
chr9	109937437	109937438	2734
chr9	109937438	109937439	2777
chr9	109937439	109937440	2750
chr9	109937440	109937441	2822
chr9	109937441	109937442	2824
chr9	109937442	109937443	2822
chr9	109937443	109937444	2840
chr9	109937444	109937445	2842
chr9	109937445	109937446	2813
chr9	109937446	109937447	2810
chr9	109937447	109937448	2819
chr9	109937448	109937449	2817
chr9	109937449	109937450	2794
chr9	109937450	109937451	2685
chr9	109937451	109937452	2686
chr9	109937452	109937453	2730
chr9	109937453	109937454	2722
chr9	109937454	109937455	2706
chr9	109937455	109937456	2675
chr9	109937456	109937457	2599
chr9	109937457	109937458	2587
chr9	109937458	109937459	2614
chr9	109937459	109937460	2585
chr9	109937460	109937461	2575
chr9	109937461	109937462	2569
chr9	109937462	109937463	2631
chr9	109937463	109937464	2641
chr9	109937464	109937465	2636
chr9	109937465	109937466	2638
chr9	109937466	109937468	2620
chr9	109937468	109937469	2607
chr9	109937469	109937470	2610
chr9	109937470	109937471	2632
chr9	109937471	109937472	2651
chr9	109937472	109937473	2673
chr9	109937473	109937474	2676
chr9	109937474	109937475	2785
chr9	109937475	109937476	2744
chr9	109937476	109937477	2759
chr9	109937477	109937478	2762
chr9	109937478	109937479	2761
chr9	109937479	109937480	2749
chr9	109937480	109937481	2696
chr9	109937481	109937482	2717
chr9	109937482	109937483	2839
chr9	109937483	109937484	2860
chr9	109937484	109937485	2832
chr9	109937485	109937486	2826
chr9	109937486	109937487	2916
chr9	109937487	109937488	3106
chr9	109937488	109937489	3115
chr9	109937489	109937490	3126
chr9	109937490	109937491	3098
chr9	109937491	109937492	3114
chr9	109937492	109937493	3161
chr9	109937493	109937494	3139
chr9	109937494	109937495	3178
chr9	109937495	109937496	3155
chr9	109937496	109937497	3117
chr9	109937497	109937498	3143
chr9	109937498	109937499	3172
chr9	109937499	109937500	3123
chr9	109937500	109937501	3122
chr9	109937501	109937502	3080
chr9	109937502	109937503	3034
chr9	109937503	109937504	2973
chr9	109937504	109937505	2997
chr9	109937505	109937506	3086
chr9	109937506	109937507	3191
chr9	109937507	109937508	3194
chr9	109937508	109937509	3192
chr9	109937509	109937510	3196
chr9	109937510	109937511	3163
chr9	109937511	109937512	3143
chr9	109937512	109937513	3149
chr9	109937513	109937514	3163
chr9	109937514	109937515	3158
chr9	109937515	109937516	3146
chr9	109937516	109937517	3135
chr9	109937517	109937519	3100
chr9	109937519	109937520	3084
chr9	109937520	109937521	3075
chr9	109937521	109937522	3053
chr9	109937522	109937523	3050
chr9	109937523	109937524	3052
chr9	109937524	109937525	3106
chr9	109937525	109937526	3090
chr9	109937526	109937527	3102
chr9	109937527	109937528	3078
chr9	109937528	109937529	3075
chr9	109937529	109937530	3081
chr9	109937530	109937531	3076
chr9	109937531	109937532	3072
chr9	109937532	109937533	3042
chr9	109937533	109937534	3040
chr9	109937534	109937535	2837
chr9	109937535	109937536	2810
chr9	109937536	109937537	2782
chr9	109937537	109937538	2752
chr9	109937538	109937539	2669
chr9	109937539	109937540	2655
chr9	109937540	109937541	2585
chr9	109937541	109937542	2569
chr9	109937542	109937543	2623
chr9	109937543	109937544	2607
chr9	109937544	109937545	2592
chr9	109937545	109937546	2579
chr9	109937546	109937547	2667
chr9	109937547	109937548	2674
chr9	109937548	109937549	2677
chr9	109937549	109937550	2670
chr9	109937550	109937551	2665
chr9	109937551	109937552	2695
chr9	109937552	109937553	2660
chr9	109937553	109937555	2658
chr9	109937555	109937556	2651
chr9	109937556	109937557	2645
chr9	109937557	109937558	2637
chr9	109937558	109937559	2614
chr9	109937559	109937560	2623
chr9	109937560	109937562	2660
chr9	109937562	109937563	2583
chr9	109937563	109937564	2556
chr9	109937564	109937565	2536
chr9	109937565	109937566	2541
chr9	109937566	109937567	2643
chr9	109937567	109937569	2638
chr9	109937569	109937570	2611
chr9	109937570	109937571	2612
chr9	109937571	109937572	2619
chr9	109937572	109937573	2598
chr9	109937573	109937574	2605
chr9	109937574	109937575	2461
chr9	109937575	109937576	2468
chr9	109937576	109937577	2532
chr9	109937577	109937578	2566
chr9	109937578	109937579	2571
chr9	109937579	109937580	2582
chr9	109937580	109937581	2614
chr9	109937581	109937582	2587
chr9	109937582	109937583	2510
chr9	109937583	109937584	2495
chr9	109937584	109937585	2499
chr9	109937585	109937586	2493
chr9	109937586	109937587	2393
chr9	109937587	109937588	2207
chr9	109937588	109937589	2248
chr9	109937589	109937590	2251
chr9	109937590	109937591	2292
chr9	109937591	109937592	2277
chr9	109937592	109937593	2236
chr9	109937593	109937594	2251
chr9	109937594	109937595	2219
chr9	109937595	109937596	2216
chr9	109937596	109937597	2231
chr9	109937597	109937598	2229
chr9	109937598	109937599	2172
chr9	109937599	109937600	2137
chr9	109937600	109937601	2143
chr9	109937601	109937602	2104
chr9	109937602	109937603	2142
chr9	109937603	109937604	2149
chr9	109937604	109937605	2120
chr9	109937605	109937606	2008
chr9	109937606	109937607	1928
chr9	109937607	109937608	1933
chr9	109937608	109937609	1996
chr9	109937609	109937610	1965
chr9	109937610	109937611	1968
chr9	109937611	109937612	1976
chr9	109937612	109937613	2005
chr9	109937613	109937614	1997
chr9	109937614	109937615	2005
chr9	109937615	109937616	1996
chr9	109937616	109937617	1971
chr9	109937617	109937619	1949
chr9	109937619	109937620	1951
chr9	109937620	109937621	1963
chr9	109937621	109937622	1962
chr9	109937622	109937623	1971
chr9	109937623	109937624	1966
chr9	109937624	109937625	1975
chr9	109937625	109937626	1989
chr9	109937626	109937627	2015
chr9	109937627	109937628	2019
chr9	109937628	109937629	1973
chr9	109937629	109937630	1942
chr9	109937630	109937631	2044
chr9	109937631	109937632	2047
chr9	109937632	109937633	2050
chr9	109937633	109937634	2046
chr9	109937634	109937635	2041
chr9	109937635	109937636	2096
chr9	109937636	109937637	2104
chr9	109937637	109937638	2117
chr9	109937638	109937640	2112
chr9	109937640	109937641	2099
chr9	109937641	109937642	2094
chr9	109937642	109937643	2040
chr9	109937643	109937644	2041
chr9	109937644	109937645	2065
chr9	109937645	109937646	2061
chr9	109937646	109937647	1968
chr9	109937647	109937648	1953
chr9	109937648	109937649	1948
chr9	109937649	109937650	1966
chr9	109937650	109937651	1979
chr9	109937651	109937652	1956
chr9	109937652	109937653	1935
chr9	109937653	109937654	1937
chr9	109937654	109937655	1995
chr9	109937655	109937656	2059
chr9	109937656	109937657	2061
chr9	109937657	109937658	2065
chr9	109937658	109937659	2057
chr9	109937659	109937660	2071
chr9	109937660	109937661	2044
chr9	109937661	109937662	2056
chr9	109937662	109937663	2077
chr9	109937663	109937664	2098
chr9	109937664	109937665	2123
chr9	109937665	109937666	2144
chr9	109937666	109937667	2177
chr9	109937667	109937668	2197
chr9	109937668	109937669	2200
chr9	109937669	109937670	2190
chr9	109937670	109937671	2185
chr9	109937671	109937672	2162
chr9	109937672	109937673	2238
chr9	109937673	109937674	2232
chr9	109937674	109937675	2215
chr9	109937675	109937676	2210
chr9	109937676	109937677	2138
chr9	109937677	109937678	2119
chr9	109937678	109937679	2149
chr9	109937679	109937680	2137
chr9	109937680	109937681	2136
chr9	109937681	109937682	2160
chr9	109937682	109937683	2122
chr9	109937683	109937684	2108
chr9	109937684	109937685	2106
chr9	109937685	109937686	2124
chr9	109937686	109937687	2270
chr9	109937687	109937688	2329
chr9	109937688	109937689	2290
chr9	109937689	109937690	2288
chr9	109937690	109937691	2266
chr9	109937691	109937692	2271
chr9	109937692	109937693	2322
chr9	109937693	109937694	2311
chr9	109937694	109937695	2309
chr9	109937695	109937696	2311
chr9	109937696	109937697	2309
chr9	109937697	109937698	2293
chr9	109937698	109937699	2305
chr9	109937699	109937700	2311
chr9	109937700	109937701	2310
chr9	109937701	109937702	2357
chr9	109937702	109937703	2325
chr9	109937703	109937704	2362
chr9	109937704	109937705	2352
chr9	109937705	109937706	2362
chr9	109937706	109937707	2336
chr9	109937707	109937708	2327
chr9	109937708	109937709	2304
chr9	109937709	109937710	2311
chr9	109937710	109937711	2322
chr9	109937711	109937712	2314
chr9	109937712	109937713	2263
chr9	109937713	109937714	2257
chr9	109937714	109937715	2469
chr9	109937715	109937716	2482
chr9	109937716	109937717	2487
chr9	109937717	109937718	2484
chr9	109937718	109937719	2463
chr9	109937719	109937720	2470
chr9	109937720	109937721	2462
chr9	109937721	109937722	2465
chr9	109937722	109937723	2448
chr9	109937723	109937724	2443
chr9	109937724	109937725	2381
chr9	109937725	109937726	2364
chr9	109937726	109937727	2351
chr9	109937727	109937728	2341
chr9	109937728	109937729	2347
chr9	109937729	109937730	2348
chr9	109937730	109937731	2248
chr9	109937731	109937732	2241
chr9	109937732	109937733	2243
chr9	109937733	109937734	2284
chr9	109937734	109937735	2282
chr9	109937735	109937736	2234
chr9	109937736	109937737	2223
chr9	109937737	109937738	2217
chr9	109937738	109937739	2228
chr9	109937739	109937740	2238
chr9	109937740	109937741	2251
chr9	109937741	109937742	2253
chr9	109937742	109937743	2254
chr9	109937743	109937744	2355
chr9	109937744	109937745	2360
chr9	109937745	109937746	2362
chr9	109937746	109937748	2370
chr9	109937748	109937749	2396
chr9	109937749	109937750	2384
chr9	109937750	109937751	2427
chr9	109937751	109937752	2458
chr9	109937752	109937753	2513
chr9	109937753	109937754	2532
chr9	109937754	109937755	2473
chr9	109937755	109937756	2405
chr9	109937756	109937757	2450
chr9	109937757	109937758	2463
chr9	109937758	109937759	2465
chr9	109937759	109937760	2470
chr9	109937760	109937761	2462
chr9	109937761	109937762	2452
chr9	109937762	109937763	2435
chr9	109937763	109937764	2474
chr9	109937764	109937765	2581
chr9	109937765	109937766	2553
chr9	109937766	109937767	2427
chr9	109937767	109937768	2393
chr9	109937768	109937769	2391
chr9	109937769	109937770	2396
chr9	109937770	109937771	2460
chr9	109937771	109937772	2571
chr9	109937772	109937773	2512
chr9	109937773	109937774	2500
chr9	109937774	109937775	2570
chr9	109937775	109937776	2586
chr9	109937776	109937777	2641
chr9	109937777	109937778	2627
chr9	109937778	109937779	2596
chr9	109937779	109937780	2634
chr9	109937780	109937781	2605
chr9	109937781	109937782	2585
chr9	109937782	109937783	2653
chr9	109937783	109937784	2663
chr9	109937784	109937785	2674
chr9	109937785	109937786	2657
chr9	109937786	109937787	2549
chr9	109937787	109937788	2479
chr9	109937788	109937789	2462
chr9	109937789	109937790	2456
chr9	109937790	109937791	2444
chr9	109937791	109937792	2436
chr9	109937792	109937793	2407
chr9	109937793	109937794	2397
chr9	109937794	109937795	2394
chr9	109937795	109937796	2389
chr9	109937796	109937797	2365
chr9	109937797	109937798	2363
chr9	109937798	109937799	2382
chr9	109937799	109937800	2386
chr9	109937800	109937801	2407
chr9	109937801	109937802	2362
chr9	109937802	109937803	2359
chr9	109937803	109937804	2302
chr9	109937804	109937805	2333
chr9	109937805	109937806	2437
chr9	109937806	109937807	2431
chr9	109937807	109937808	2437
chr9	109937808	109937809	2392
chr9	109937809	109937810	2379
chr9	109937810	109937811	2390
chr9	109937811	109937812	2386
chr9	109937812	109937813	2510
chr9	109937813	109937814	2507
chr9	109937814	109937815	2314
chr9	109937815	109937816	2325
chr9	109937816	109937817	2313
chr9	109937817	109937818	2324
chr9	109937818	109937819	2325
chr9	109937819	109937820	2319
chr9	109937820	109937821	2327
chr9	109937821	109937822	2337
chr9	109937822	109937823	2360
chr9	109937823	109937824	2359
chr9	109937824	109937825	2371
chr9	109937825	109937826	2374
chr9	109937826	109937827	2344
chr9	109937827	109937828	2353
chr9	109937828	109937829	2356
chr9	109937829	109937830	2469
chr9	109937830	109937831	2481
chr9	109937831	109937832	2511
chr9	109937832	109937833	2510
chr9	109937833	109937834	2478
chr9	109937834	109937835	2546
chr9	109937835	109937836	2586
chr9	109937836	109937837	2590
chr9	109937837	109937838	2599
chr9	109937838	109937839	2608
chr9	109937839	109937840	2605
chr9	109937840	109937841	2677
chr9	109937841	109937842	2687
chr9	109937842	109937843	2694
chr9	109937843	109937844	2604
chr9	109937844	109937845	2750
chr9	109937845	109937846	2807
chr9	109937846	109937847	2819
chr9	109937847	109937848	2844
chr9	109937848	109937849	2855
chr9	109937849	109937850	2913
chr9	109937850	109937851	2862
chr9	109937851	109937852	2858
chr9	109937852	109937853	2910
chr9	109937853	109937854	2899
chr9	109937854	109937855	2906
chr9	109937855	109937856	2942
chr9	109937856	109937857	2910
chr9	109937857	109937858	2900
chr9	109937858	109937859	2916
chr9	109937859	109937860	2921
chr9	109937860	109937861	2932
chr9	109937861	109937862	2929
chr9	109937862	109937863	2923
chr9	109937863	109937864	2871
chr9	109937864	109937865	2745
chr9	109937865	109937866	2744
chr9	109937866	109937867	2728
chr9	109937867	109937868	2732
chr9	109937868	109937869	2738
chr9	109937869	109937870	2720
chr9	109937870	109937871	2643
chr9	109937871	109937873	2533
chr9	109937873	109937874	2547
chr9	109937874	109937875	2499
chr9	109937875	109937876	2500
chr9	109937876	109937877	2437
chr9	109937877	109937878	2434
chr9	109937878	109937879	2454
chr9	109937879	109937880	2441
chr9	109937880	109937881	2447
chr9	109937881	109937882	2437
chr9	109937882	109937883	2395
chr9	109937883	109937884	2398
chr9	109937884	109937885	2510
chr9	109937885	109937886	2525
chr9	109937886	109937887	2492
chr9	109937887	109937888	2494
chr9	109937888	109937889	2512
chr9	109937889	109937890	2516
chr9	109937890	109937891	2511
chr9	109937891	109937892	2514
chr9	109937892	109937893	2487
chr9	109937893	109937894	2534
chr9	109937894	109937895	2559
chr9	109937895	109937896	2573
chr9	109937896	109937897	2667
chr9	109937897	109937898	2672
chr9	109937898	109937899	2656
chr9	109937899	109937900	2674
chr9	109937900	109937901	2688
chr9	109937901	109937902	2689
chr9	109937902	109937903	2714
chr9	109937903	109937904	2751
chr9	109937904	109937905	2732
chr9	109937905	109937906	2614
chr9	109937906	109937907	2650
chr9	109937907	109937908	2676
chr9	109937908	109937909	2717
chr9	109937909	109937910	2743
chr9	109937910	109937911	2727
chr9	109937911	109937912	2738
chr9	109937912	109937913	2623
chr9	109937913	109937914	2663
chr9	109937914	109937915	2632
chr9	109937915	109937916	2613
chr9	109937916	109937917	2641
chr9	109937917	109937918	2673
chr9	109937918	109937919	2685
chr9	109937919	109937920	2689
chr9	109937920	109937921	2686
chr9	109937921	109937922	2699
chr9	109937922	109937923	2796
chr9	109937923	109937924	2808
chr9	109937924	109937925	2806
chr9	109937925	109937926	2811
chr9	109937926	109937927	2932
chr9	109937927	109937928	3000
chr9	109937928	109937929	3125
chr9	109937929	109937930	3040
chr9	109937930	109937931	3044
chr9	109937931	109937932	3050
chr9	109937932	109937933	3055
chr9	109937933	109937934	3064
chr9	109937934	109937935	3005
chr9	109937935	109937936	3002
chr9	109937936	109937937	3006
chr9	109937937	109937939	3002
chr9	109937939	109937940	3016
chr9	109937940	109937941	2974
chr9	109937941	109937942	2984
chr9	109937942	109937943	2981
chr9	109937943	109937944	2962
chr9	109937944	109937945	2787
chr9	109937945	109937946	2752
chr9	109937946	109937947	2742
chr9	109937947	109937948	2744
chr9	109937948	109937949	2726
chr9	109937949	109937950	2670
chr9	109937950	109937951	2666
chr9	109937951	109937952	2636
chr9	109937952	109937954	2567
chr9	109937954	109937955	2565
chr9	109937955	109937956	2540
chr9	109937956	109937957	2551
chr9	109937957	109937958	2558
chr9	109937958	109937959	2546
chr9	109937959	109937960	2520
chr9	109937960	109937961	2504
chr9	109937961	109937962	2509
chr9	109937962	109937963	2519
chr9	109937963	109937964	2536
chr9	109937964	109937965	2543
chr9	109937965	109937966	2583
chr9	109937966	109937967	2602
chr9	109937967	109937968	2605
chr9	109937968	109937969	2598
chr9	109937969	109937970	2607
chr9	109937970	109937971	2599
chr9	109937971	109937972	2596
chr9	109937972	109937973	2660
chr9	109937973	109937974	2696
chr9	109937974	109937975	2673
chr9	109937975	109937976	2654
chr9	109937976	109937977	2647
chr9	109937977	109937978	2640
chr9	109937978	109937979	2665
chr9	109937979	109937980	2647
chr9	109937980	109937981	2697
chr9	109937981	109937982	2710
chr9	109937982	109937983	2689
chr9	109937983	109937984	2683
chr9	109937984	109937985	2578
chr9	109937985	109937986	2580
chr9	109937986	109937987	2670
chr9	109937987	109937988	2677
chr9	109937988	109937989	2694
chr9	109937989	109937990	2691
chr9	109937990	109937991	2693
chr9	109937991	109937992	2747
chr9	109937992	109937993	2861
chr9	109937993	109937994	2820
chr9	109937994	109937995	2799
chr9	109937995	109937997	2835
chr9	109937997	109937999	2856
chr9	109937999	109938000	2830
chr9	109938000	109938001	2783
chr9	109938001	109938002	2820
chr9	109938002	109938003	2791
chr9	109938003	109938004	2758
chr9	109938004	109938005	2743
chr9	109938005	109938006	2749
chr9	109938006	109938007	2707
chr9	109938007	109938008	2673
chr9	109938008	109938009	2629
chr9	109938009	109938010	2601
chr9	109938010	109938011	30

## Sheet: C_Myoblast
track type=wiggle_0 name="C2C12 Myob Raw" description="C2C12 Myoblast RNA-seq Raw Signal from ENCODE/Caltech"
#bedGraph section chr9:109966871-109973287
chr9	109971195	109971196	82
chr9	109971196	109971197	2567
chr9	109971197	109971198	2554
chr9	109971198	109971199	2511
chr9	109971199	109971200	2498
chr9	109971200	109971202	2765
chr9	109971202	109971204	2766
chr9	109971204	109971205	2747
chr9	109971205	109971206	2749
chr9	109971206	109971207	2681
chr9	109971207	109971208	2675
chr9	109971208	109971209	2668
chr9	109971209	109971210	2626
chr9	109971210	109971211	2599
chr9	109971211	109971212	2578
chr9	109971212	109971213	2517
chr9	109971213	109971214	2524
chr9	109971214	109971215	2514
chr9	109971215	109971216	2501
chr9	109971216	109971217	2266
chr9	109971217	109971218	2269
chr9	109971218	109971219	2288
chr9	109971219	109971220	2263
chr9	109971220	109971221	2268
chr9	109971221	109971222	2239
chr9	109971222	109971223	2219
chr9	109971223	109971224	2214
chr9	109971224	109971225	2220
chr9	109971225	109971226	2242
chr9	109971226	109971227	2170
chr9	109971227	109971228	2145
chr9	109971228	109971229	2117
chr9	109971229	109971230	2100
chr9	109971230	109971232	2075
chr9	109971232	109971233	2073
chr9	109971233	109971234	1993
chr9	109971234	109971235	1977
chr9	109971235	109971236	1940
chr9	109971236	109971237	1953
chr9	109971237	109971238	1937
chr9	109971238	109971239	1957
chr9	109971239	109971240	1956
chr9	109971240	109971241	1930
chr9	109971241	109971242	1932
chr9	109971242	109971243	1953
chr9	109971243	109971244	1949
chr9	109971244	109971245	1940
chr9	109971245	109971246	1887
chr9	109971246	109971247	1866
chr9	109971247	109971248	1868
chr9	109971248	109971249	1934
chr9	109971249	109971250	1925
chr9	109971250	109971251	1915
chr9	109971251	109971252	1942
chr9	109971252	109971253	1951
chr9	109971253	109971254	1961
chr9	109971254	109971255	1968
chr9	109971255	109971256	1992
chr9	109971256	109971257	1982
chr9	109971257	109971258	1988
chr9	109971258	109971259	1997
chr9	109971259	109971260	2006
chr9	109971260	109971261	1990
chr9	109971261	109971262	2020
chr9	109971262	109971263	2055
chr9	109971263	109971264	2053
chr9	109971264	109971266	2055
chr9	109971266	109971267	2051
chr9	109971267	109971268	2039
chr9	109971268	109971269	2005
chr9	109971269	109971270	1996
chr9	109971270	109971271	1984
chr9	109971271	109971272	1983
chr9	109971272	109971273	1977
chr9	109971273	109971274	1972
chr9	109971274	109971275	1956
chr9	109971275	109971276	1935
chr9	109971276	109971277	1937
chr9	109971277	109971278	1958
chr9	109971278	109971279	1952
chr9	109971279	109971280	1956
chr9	109971280	109971281	1784
chr9	109971281	109971282	1767
chr9	109971282	109971283	1757
chr9	109971283	109971284	1775
chr9	109971284	109971285	1879
chr9	109971285	109971286	1847
chr9	109971286	109971287	1849
chr9	109971287	109971288	1864
chr9	109971288	109971289	1846
chr9	109971289	109971290	1901
chr9	109971290	109971291	1853
chr9	109971291	109971292	1855
chr9	109971292	109971293	1894
chr9	109971293	109971294	1941
chr9	109971294	109971295	1975
chr9	109971295	109971296	1957
chr9	109971296	109971297	1968
chr9	109971297	109971298	2057
chr9	109971298	109971299	2083
chr9	109971299	109971300	2112
chr9	109971300	109971301	1872
chr9	109971301	109971302	1870
chr9	109971302	109971303	1909
chr9	109971303	109971304	1904
chr9	109971304	109971305	1895
chr9	109971305	109971306	1889
chr9	109971306	109971307	1903
chr9	109971307	109971308	1917
chr9	109971308	109971309	1910
chr9	109971309	109971310	1906
chr9	109971310	109971311	1853
chr9	109971311	109971312	1837
chr9	109971312	109971313	1841
chr9	109971313	109971314	1837
chr9	109971314	109971315	1836
chr9	109971315	109971316	1841
chr9	109971316	109971317	1838
chr9	109971317	109971318	1865
chr9	109971318	109971319	1856
chr9	109971319	109971320	1857
chr9	109971320	109971321	1847
chr9	109971321	109971322	1835
chr9	109971322	109971324	1841
chr9	109971324	109971325	1831
chr9	109971325	109971326	1807
chr9	109971326	109971327	1825
chr9	109971327	109971328	1813
chr9	109971328	109971329	1810
chr9	109971329	109971330	1816
chr9	109971330	109971331	1805
chr9	109971331	109971332	1803
chr9	109971332	109971333	1797
chr9	109971333	109971334	1800
chr9	109971334	109971335	1791
chr9	109971335	109971336	1790
chr9	109971336	109971337	1768
chr9	109971337	109971338	1766
chr9	109971338	109971339	1743
chr9	109971339	109971340	1745
chr9	109971340	109971341	1726
chr9	109971341	109971342	1727
chr9	109971342	109971343	1713
chr9	109971343	109971344	1709
chr9	109971344	109971345	1756
chr9	109971345	109971346	1765
chr9	109971346	109971347	1759
chr9	109971347	109971348	1768
chr9	109971348	109971349	1752
chr9	109971349	109971350	1812
chr9	109971350	109971351	1817
chr9	109971351	109971352	1938
chr9	109971352	109971353	1913
chr9	109971353	109971354	1901
chr9	109971354	109971355	1890
chr9	109971355	109971357	1897
chr9	109971357	109971358	1877
chr9	109971358	109971359	1867
chr9	109971359	109971360	1855
chr9	109971360	109971361	1864
chr9	109971361	109971362	1831
chr9	109971362	109971363	1820
chr9	109971363	109971364	1819
chr9	109971364	109971365	1812
chr9	109971365	109971366	1810
chr9	109971366	109971367	1837
chr9	109971367	109971368	1834
chr9	109971368	109971369	1843
chr9	109971369	109971370	1852
chr9	109971370	109971371	1850
chr9	109971371	109971372	1848
chr9	109971372	109971373	1831
chr9	109971373	109971374	1823
chr9	109971374	109971375	1837
chr9	109971375	109971376	1844
chr9	109971376	109971377	1847
chr9	109971377	109971378	1826
chr9	109971378	109971379	1831
chr9	109971379	109971380	1812
chr9	109971380	109971381	1813
chr9	109971381	109971382	1830
chr9	109971382	109971383	1826
chr9	109971383	109971384	1814
chr9	109971384	109971385	1708
chr9	109971385	109971386	1710
chr9	109971386	109971387	1687
chr9	109971387	109971388	1676
chr9	109971388	109971389	1701
chr9	109971389	109971390	1699
chr9	109971390	109971392	1704
chr9	109971392	109971393	1671
chr9	109971393	109971394	1645
chr9	109971394	109971395	1609
chr9	109971395	109971396	1638
chr9	109971396	109971397	1640
chr9	109971397	109971398	1564
chr9	109971398	109971399	1537
chr9	109971399	109971400	1522
chr9	109971400	109971401	1507
chr9	109971401	109971402	1538
chr9	109971402	109971403	1508
chr9	109971403	109971404	1520
chr9	109971404	109971405	1524
chr9	109971405	109971406	1519
chr9	109971406	109971407	1539
chr9	109971407	109971408	1534
chr9	109971408	109971409	1553
chr9	109971409	109971411	1574
chr9	109971411	109971412	1597
chr9	109971412	109971413	1613
chr9	109971413	109971414	1606
chr9	109971414	109971415	1610
chr9	109971415	109971416	1600
chr9	109971416	109971417	1621
chr9	109971417	109971418	1608
chr9	109971418	109971419	1648
chr9	109971419	109971420	1647
chr9	109971420	109971421	1650
chr9	109971421	109971422	1651
chr9	109971422	109971423	1653
chr9	109971423	109971424	1661
chr9	109971424	109971425	1664
chr9	109971425	109971426	1676
chr9	109971426	109971427	1660
chr9	109971427	109971428	1661
chr9	109971428	109971429	1658
chr9	109971429	109971431	1639
chr9	109971431	109971432	1650
chr9	109971432	109971433	1811
chr9	109971433	109971434	1821
chr9	109971434	109971435	1840
chr9	109971435	109971436	1848
chr9	109971436	109971437	1851
chr9	109971437	109971438	1877
chr9	109971438	109971439	1899
chr9	109971439	109971440	1923
chr9	109971440	109971441	1940
chr9	109971441	109971442	1979
chr9	109971442	109971443	1974
chr9	109971443	109971444	1979
chr9	109971444	109971445	1960
chr9	109971445	109971446	1936
chr9	109971446	109971447	1975
chr9	109971447	109971448	1968
chr9	109971448	109971449	1917
chr9	109971449	109971450	1864
chr9	109971450	109971451	1845
chr9	109971451	109971453	1689
chr9	109971453	109971454	1693
chr9	109971454	109971455	1700
chr9	109971455	109971456	1669
chr9	109971456	109971457	1652
chr9	109971457	109971458	1668
chr9	109971458	109971459	1673
chr9	109971459	109971460	1672
chr9	109971460	109971461	1659
chr9	109971461	109971462	1664
chr9	109971462	109971463	1646
chr9	109971463	109971464	1648
chr9	109971464	109971465	1716
chr9	109971465	109971466	1721
chr9	109971466	109971467	1700
chr9	109971467	109971468	1704
chr9	109971468	109971469	1700
chr9	109971469	109971470	1689
chr9	109971470	109971472	1723
chr9	109971472	109971473	1726
chr9	109971473	109971474	1725
chr9	109971474	109971475	1718
chr9	109971475	109971476	1715
chr9	109971476	109971477	1705
chr9	109971477	109971478	1729
chr9	109971478	109971479	1738
chr9	109971479	109971480	1733
chr9	109971480	109971481	1737
chr9	109971481	109971482	1722
chr9	109971482	109971483	1725
chr9	109971483	109971484	1736
chr9	109971484	109971485	1728
chr9	109971485	109971486	1729
chr9	109971486	109971487	1721
chr9	109971487	109971488	1711
chr9	109971488	109971489	1681

## Sheet: C_Myocyte 60h
track type=wiggle_0 name="C2C12 Myoc Raw" description="C2C12 Myocyte 60 h RNA-seq Raw Signal from ENCODE/Caltech"
#bedGraph section chr9:109967976-109972264
chr9	109971195	109971196	154
chr9	109971196	109971197	3031
chr9	109971197	109971198	3017
chr9	109971198	109971199	2956
chr9	109971199	109971200	2951
chr9	109971200	109971202	3276
chr9	109971202	109971203	3274
chr9	109971203	109971204	3281
chr9	109971204	109971205	3243
chr9	109971205	109971206	3241
chr9	109971206	109971207	3159
chr9	109971207	109971208	3156
chr9	109971208	109971209	3152
chr9	109971209	109971210	3101
chr9	109971210	109971211	3111
chr9	109971211	109971212	3089
chr9	109971212	109971213	3029
chr9	109971213	109971214	3032
chr9	109971214	109971215	3027
chr9	109971215	109971216	3007
chr9	109971216	109971217	2780
chr9	109971217	109971218	2765
chr9	109971218	109971219	2782
chr9	109971219	109971220	2744
chr9	109971220	109971221	2756
chr9	109971221	109971222	2736
chr9	109971222	109971223	2721
chr9	109971223	109971225	2697
chr9	109971225	109971226	2730
chr9	109971226	109971227	2638
chr9	109971227	109971228	2604
chr9	109971228	109971229	2577
chr9	109971229	109971230	2567
chr9	109971230	109971231	2536
chr9	109971231	109971232	2535
chr9	109971232	109971233	2531
chr9	109971233	109971234	2441
chr9	109971234	109971235	2426
chr9	109971235	109971236	2379
chr9	109971236	109971237	2384
chr9	109971237	109971238	2349
chr9	109971238	109971239	2367
chr9	109971239	109971240	2360
chr9	109971240	109971241	2332
chr9	109971241	109971242	2337
chr9	109971242	109971244	2346
chr9	109971244	109971245	2337
chr9	109971245	109971246	2302
chr9	109971246	109971247	2279
chr9	109971247	109971248	2283
chr9	109971248	109971249	2363
chr9	109971249	109971250	2331
chr9	109971250	109971251	2321
chr9	109971251	109971252	2339
chr9	109971252	109971253	2326
chr9	109971253	109971254	2334
chr9	109971254	109971255	2349
chr9	109971255	109971256	2375
chr9	109971256	109971257	2394
chr9	109971257	109971258	2387
chr9	109971258	109971259	2402
chr9	109971259	109971260	2417
chr9	109971260	109971261	2399
chr9	109971261	109971262	2421
chr9	109971262	109971263	2474
chr9	109971263	109971264	2480
chr9	109971264	109971265	2473
chr9	109971265	109971266	2464
chr9	109971266	109971267	2467
chr9	109971267	109971268	2452
chr9	109971268	109971269	2437
chr9	109971269	109971270	2430
chr9	109971270	109971271	2409
chr9	109971271	109971272	2402
chr9	109971272	109971273	2386
chr9	109971273	109971274	2371
chr9	109971274	109971275	2359
chr9	109971275	109971276	2326
chr9	109971276	109971277	2333
chr9	109971277	109971278	2347
chr9	109971278	109971279	2346
chr9	109971279	109971280	2344
chr9	109971280	109971281	2210
chr9	109971281	109971282	2186
chr9	109971282	109971283	2173
chr9	109971283	109971284	2186
chr9	109971284	109971285	2289
chr9	109971285	109971286	2267
chr9	109971286	109971287	2264
chr9	109971287	109971288	2267
chr9	109971288	109971289	2246
chr9	109971289	109971290	2294
chr9	109971290	109971291	2250
chr9	109971291	109971292	2253
chr9	109971292	109971293	2286
chr9	109971293	109971294	2329
chr9	109971294	109971295	2355
chr9	109971295	109971296	2279
chr9	109971296	109971297	2293
chr9	109971297	109971298	2378
chr9	109971298	109971299	2415
chr9	109971299	109971300	2463
chr9	109971300	109971301	2173
chr9	109971301	109971302	2169
chr9	109971302	109971303	2203
chr9	109971303	109971304	2196
chr9	109971304	109971305	2193
chr9	109971305	109971306	2188
chr9	109971306	109971307	2191
chr9	109971307	109971308	2210
chr9	109971308	109971309	2214
chr9	109971309	109971310	2203
chr9	109971310	109971311	2095
chr9	109971311	109971312	2057
chr9	109971312	109971313	2064
chr9	109971313	109971314	2067
chr9	109971314	109971315	2063
chr9	109971315	109971316	2066
chr9	109971316	109971317	2065
chr9	109971317	109971318	2106
chr9	109971318	109971319	2091
chr9	109971319	109971320	2089
chr9	109971320	109971321	2077
chr9	109971321	109971322	2058
chr9	109971322	109971323	2054
chr9	109971323	109971324	2056
chr9	109971324	109971325	2054
chr9	109971325	109971326	2021
chr9	109971326	109971327	2029
chr9	109971327	109971328	2014
chr9	109971328	109971329	2004
chr9	109971329	109971330	1993
chr9	109971330	109971331	1982
chr9	109971331	109971332	1977
chr9	109971332	109971333	1974
chr9	109971333	109971334	1977
chr9	109971334	109971335	1979
chr9	109971335	109971336	1975
chr9	109971336	109971337	1959
chr9	109971337	109971338	1952
chr9	109971338	109971339	1934
chr9	109971339	109971340	1929
chr9	109971340	109971341	1909
chr9	109971341	109971342	1913
chr9	109971342	109971344	1901
chr9	109971344	109971345	1932
chr9	109971345	109971346	1917
chr9	109971346	109971347	1907
chr9	109971347	109971348	1910
chr9	109971348	109971349	1893
chr9	109971349	109971350	1966
chr9	109971350	109971351	1969
chr9	109971351	109971352	2070
chr9	109971352	109971353	2052
chr9	109971353	109971354	2039
chr9	109971354	109971355	2014
chr9	109971355	109971356	2027
chr9	109971356	109971357	2020
chr9	109971357	109971358	2019
chr9	109971358	109971359	2008
chr9	109971359	109971360	1995
chr9	109971360	109971361	2016
chr9	109971361	109971362	1993
chr9	109971362	109971363	1966
chr9	109971363	109971365	1959
chr9	109971365	109971366	1953
chr9	109971366	109971367	1974
chr9	109971367	109971368	1977
chr9	109971368	109971369	1978
chr9	109971369	109971370	2005
chr9	109971370	109971371	2004
chr9	109971371	109971372	2001
chr9	109971372	109971373	1996
chr9	109971373	109971374	2008
chr9	109971374	109971375	2020
chr9	109971375	109971376	2033
chr9	109971376	109971377	2046
chr9	109971377	109971378	2033
chr9	109971378	109971379	2031
chr9	109971379	109971380	2014
chr9	109971380	109971381	2013
chr9	109971381	109971382	2035
chr9	109971382	109971383	2037
chr9	109971383	109971384	2023
chr9	109971384	109971385	1911
chr9	109971385	109971386	1922
chr9	109971386	109971387	1912
chr9	109971387	109971388	1895
chr9	109971388	109971389	1909
chr9	109971389	109971390	1934
chr9	109971390	109971391	1928
chr9	109971391	109971392	1941
chr9	109971392	109971393	1912
chr9	109971393	109971394	1879
chr9	109971394	109971395	1851
chr9	109971395	109971396	1881
chr9	109971396	109971397	1884
chr9	109971397	109971398	1802
chr9	109971398	109971399	1764
chr9	109971399	109971400	1721
chr9	109971400	109971401	1706
chr9	109971401	109971402	1744
chr9	109971402	109971403	1717
chr9	109971403	109971404	1721
chr9	109971404	109971405	1719
chr9	109971405	109971406	1717
chr9	109971406	109971407	1729
chr9	109971407	109971408	1717
chr9	109971408	109971409	1732
chr9	109971409	109971410	1757
chr9	109971410	109971411	1776
chr9	109971411	109971412	1787
chr9	109971412	109971413	1801
chr9	109971413	109971414	1793
chr9	109971414	109971415	1806
chr9	109971415	109971416	1805
chr9	109971416	109971417	1811
chr9	109971417	109971418	1796
chr9	109971418	109971419	1834
chr9	109971419	109971420	1836
chr9	109971420	109971421	1826
chr9	109971421	109971422	1828
chr9	109971422	109971423	1841
chr9	109971423	109971424	1847
chr9	109971424	109971425	1841
chr9	109971425	109971426	1864
chr9	109971426	109971427	1848
chr9	109971427	109971429	1856
chr9	109971429	109971430	1849
chr9	109971430	109971431	1851
chr9	109971431	109971432	1873
chr9	109971432	109971433	2015
chr9	109971433	109971434	2024
chr9	109971434	109971435	2022
chr9	109971435	109971436	2030
chr9	109971436	109971437	2039
chr9	109971437	109971438	2073
chr9	109971438	109971439	2086
chr9	109971439	109971440	2112
chr9	109971440	109971441	2118
chr9	109971441	109971442	2143
chr9	109971442	109971443	2145
chr9	109971443	109971444	2146
chr9	109971444	109971445	2125
chr9	109971445	109971446	2098
chr9	109971446	109971447	2135
chr9	109971447	109971448	2148
chr9	109971448	109971449	2090
chr9	109971449	109971450	2040
chr9	109971450	109971451	2019
chr9	109971451	109971452	1889
chr9	109971452	109971453	1879
chr9	109971453	109971454	1881
chr9	109971454	109971455	1886
chr9	109971455	109971456	1847
chr9	109971456	109971457	1816
chr9	109971457	109971459	1837
chr9	109971459	109971460	1830
chr9	109971460	109971461	1808
chr9	109971461	109971462	1810
chr9	109971462	109971463	1795
chr9	109971463	109971464	1797
chr9	109971464	109971465	1871
chr9	109971465	109971466	1889
chr9	109971466	109971467	1864
chr9	109971467	109971468	1862
chr9	109971468	109971469	1865
chr9	109971469	109971470	1839
chr9	109971470	109971471	1876
chr9	109971471	109971473	1883
chr9	109971473	109971474	1875
chr9	109971474	109971475	1885
chr9	109971475	109971476	1883
chr9	109971476	109971477	1870
chr9	109971477	109971478	1892
chr9	109971478	109971479	1904
chr9	109971479	109971480	1903
chr9	109971480	109971481	1904
chr9	109971481	109971482	1880
chr9	109971482	109971483	1872
chr9	109971483	109971484	1879
chr9	109971484	109971485	1883
chr9	109971485	109971486	1893
chr9	109971486	109971487	1878
chr9	109971487	109971488	1884
chr9	109971488	109971489	1866

## Sheet: M_Myoblast
track type=wiggle_0 name="C2C12 Myob Raw" description="C2C12 Myoblast RNA-seq Raw Signal from ENCODE/Caltech"
#bedGraph section chr9:109937943-109951993
chr9	109939791	109939798	6
chr9	109939798	109939804	8
chr9	109939804	109939840	5
chr9	109939840	109939858	7
chr9	109939858	109939859	9
chr9	109939859	109939864	11
chr9	109939864	109939868	10
chr9	109939868	109939894	9
chr9	109939894	109939898	11
chr9	109939898	109939906	9
chr9	109939906	109939939	11
chr9	109939939	109939940	12
chr9	109939940	109939948	10
chr9	109939948	109939958	13
chr9	109939958	109939959	11
chr9	109939959	109939961	9
chr9	109939961	109939964	12
chr9	109939964	109939983	11
chr9	109939983	109939993	12
chr9	109939993	109939994	14
chr9	109939994	109940006	12
chr9	109940006	109940038	10
chr9	109940038	109940039	11
chr9	109940039	109940045	10
chr9	109940045	109940048	12
chr9	109940048	109940061	11
chr9	109940061	109940063	8
chr9	109940063	109940064	9
chr9	109940064	109940067	10
chr9	109940067	109940083	14
chr9	109940083	109940091	13
chr9	109940091	109940093	18
chr9	109940093	109940138	16
chr9	109940138	109940140	15
chr9	109940140	109940141	17
chr9	109940141	109940145	19
chr9	109940145	109940146	17
chr9	109940146	109940148	19
chr9	109940148	109940151	17
chr9	109940151	109940158	19
chr9	109940158	109940159	21
chr9	109940159	109940163	22
chr9	109940163	109940164	21
chr9	109940164	109940167	20
chr9	109940167	109940178	16
chr9	109940178	109940191	18
chr9	109940191	109940201	13
chr9	109940201	109940203	14
chr9	109940203	109940204	17
chr9	109940204	109940229	18
chr9	109940229	109940230	19
chr9	109940230	109940236	21
chr9	109940236	109940240	22
chr9	109940240	109940241	20
chr9	109940241	109940242	18
chr9	109940242	109940246	19
chr9	109940246	109940251	17
chr9	109940251	109940258	15
chr9	109940258	109940259	13
chr9	109940259	109940266	12
chr9	109940266	109940278	14
chr9	109940278	109940289	12
chr9	109940289	109940293	17
chr9	109940293	109940303	18
chr9	109940303	109940304	15
chr9	109940304	109940321	14
chr9	109940321	109940326	15
chr9	109940326	109940327	16
chr9	109940327	109940329	17
chr9	109940329	109940330	16
chr9	109940330	109940336	14
chr9	109940336	109940342	13
chr9	109940342	109940344	12
chr9	109940344	109940366	13
chr9	109940366	109940386	11
chr9	109940386	109940389	13
chr9	109940389	109940393	8
chr9	109940393	109940401	7
chr9	109940401	109940421	6
chr9	109940421	109940427	5
chr9	109940427	109940444	4
chr9	109940444	109940477	3
chr9	109940477	109940486	4
chr9	109940486	109940494	2
chr9	109940494	109940508	3
chr9	109940508	109940526	4
chr9	109940526	109940572	3
chr9	109940572	109940576	5
chr9	109940576	109940577	8
chr9	109940577	109940579	7
chr9	109940579	109940594	10
chr9	109940594	109940608	9
chr9	109940608	109940611	8
chr9	109940611	109940612	10
chr9	109940612	109940615	11
chr9	109940615	109940616	12
chr9	109940616	109940639	15
chr9	109940639	109940664	18
chr9	109940664	109940665	21
chr9	109940665	109940672	22
chr9	109940672	109940676	20
chr9	109940676	109940679	17
chr9	109940679	109940684	14
chr9	109940684	109940689	18
chr9	109940689	109940711	22
chr9	109940711	109940712	20
chr9	109940712	109940715	19
chr9	109940715	109940735	18
chr9	109940735	109940739	19
chr9	109940739	109940753	16
chr9	109940753	109940754	19
chr9	109940754	109940756	21
chr9	109940756	109940764	22
chr9	109940764	109940765	19
chr9	109940765	109940784	18
chr9	109940784	109940789	14
chr9	109940789	109940816	10
chr9	109940816	109940835	7
chr9	109940835	109940840	6
chr9	109940840	109940853	9
chr9	109940853	109940854	6
chr9	109940854	109940856	5
chr9	109940856	109940866	4
chr9	109940866	109940875	9
chr9	109940875	109940892	11
chr9	109940892	109940908	13
chr9	109940908	109940915	15
chr9	109940915	109940940	18
chr9	109940940	109940954	15
chr9	109940954	109940966	14
chr9	109940966	109940975	9
chr9	109940975	109940984	7
chr9	109940984	109940992	9
chr9	109940992	109941008	7
chr9	109941008	109941015	5
chr9	109941015	109941028	2
chr9	109941028	109941084	3
chr9	109941084	109941086	1
chr9	109941086	109941110	2
chr9	109941110	109941124	3
chr9	109941124	109941186	4
chr9	109941186	109941188	3
chr9	109941188	109941195	5
chr9	109941195	109941210	6
chr9	109941210	109941226	5
chr9	109941226	109941228	6
chr9	109941228	109941251	5
chr9	109941251	109941284	7
chr9	109941284	109941288	9
chr9	109941288	109941295	7
chr9	109941295	109941313	6
chr9	109941313	109941324	8
chr9	109941324	109941326	7
chr9	109941326	109941331	6
chr9	109941331	109941341	7
chr9	109941341	109941351	8
chr9	109941351	109941354	6
chr9	109941354	109941360	8
chr9	109941360	109941374	9
chr9	109941374	109941379	11
chr9	109941379	109941380	12
chr9	109941380	109941384	13
chr9	109941384	109941413	11
chr9	109941413	109941427	9
chr9	109941427	109941431	11
chr9	109941431	109941432	10
chr9	109941432	109941433	13
chr9	109941433	109941434	15
chr9	109941434	109941438	16
chr9	109941438	109941454	17
chr9	109941454	109941460	15
chr9	109941460	109941463	14
chr9	109941463	109941474	15
chr9	109941474	109941479	13
chr9	109941479	109941480	12
chr9	109941480	109941482	11
chr9	109941482	109941483	13
chr9	109941483	109941497	15
chr9	109941497	109941521	16
chr9	109941521	109941527	17
chr9	109941527	109941531	15
chr9	109941531	109941532	20
chr9	109941532	109941533	17
chr9	109941533	109941534	15
chr9	109941534	109941536	14
chr9	109941536	109941538	16
chr9	109941538	109941541	15
chr9	109941541	109941542	14
chr9	109941542	109941560	15
chr9	109941560	109941561	16
chr9	109941561	109941563	17
chr9	109941563	109941583	16
chr9	109941583	109941597	14
chr9	109941597	109941621	13
chr9	109941621	109941631	12
chr9	109941631	109941636	7
chr9	109941636	109941641	5
chr9	109941641	109941642	6
chr9	109941642	109941648	5
chr9	109941648	109941652	6
chr9	109941652	109941657	7
chr9	109941657	109941661	9
chr9	109941661	109941662	8
chr9	109941662	109941682	10
chr9	109941682	109941686	9
chr9	109941686	109941740	10
chr9	109941740	109941741	12
chr9	109941741	109941748	11
chr9	109941748	109941752	10
chr9	109941752	109941757	11
chr9	109941757	109941760	9
chr9	109941760	109941762	8
chr9	109941762	109941782	6
chr9	109941782	109941784	5
chr9	109941784	109941786	6
chr9	109941786	109941790	5
chr9	109941790	109941835	6
chr9	109941835	109941838	8
chr9	109941838	109941840	10
chr9	109941840	109941843	8
chr9	109941843	109941852	9
chr9	109941852	109941867	7
chr9	109941867	109941877	8
chr9	109941877	109941884	9
chr9	109941884	109941890	8
chr9	109941890	109941900	7
chr9	109941900	109941932	10
chr9	109941932	109941933	12
chr9	109941933	109941934	13
chr9	109941934	109941935	14
chr9	109941935	109941938	12
chr9	109941938	109941943	10
chr9	109941943	109941967	9
chr9	109941967	109941977	8
chr9	109941977	109941988	7
chr9	109941988	109942000	9
chr9	109942000	109942003	6
chr9	109942003	109942031	7
chr9	109942031	109942032	8
chr9	109942032	109942033	6
chr9	109942033	109942034	5
chr9	109942034	109942046	4
chr9	109942046	109942055	5
chr9	109942055	109942088	8
chr9	109942088	109942091	6
chr9	109942091	109942103	8
chr9	109942103	109942106	7
chr9	109942106	109942115	8
chr9	109942115	109942125	10
chr9	109942125	109942131	12
chr9	109942131	109942146	11
chr9	109942146	109942150	10
chr9	109942150	109942155	11
chr9	109942155	109942160	8
chr9	109942160	109942191	11
chr9	109942191	109942198	9
chr9	109942198	109942206	10
chr9	109942206	109942207	9
chr9	109942207	109942215	11
chr9	109942215	109942225	9
chr9	109942225	109942241	7
chr9	109942241	109942250	10
chr9	109942250	109942257	9
chr9	109942257	109942260	12
chr9	109942260	109942269	9
chr9	109942269	109942279	11
chr9	109942279	109942298	14
chr9	109942298	109942307	13
chr9	109942307	109942341	11
chr9	109942341	109942345	8
chr9	109942345	109942351	11
chr9	109942351	109942357	12
chr9	109942357	109942374	9
chr9	109942374	109942379	11
chr9	109942379	109942387	8
chr9	109942387	109942395	9
chr9	109942395	109942408	10
chr9	109942408	109942445	12
chr9	109942445	109942450	9
chr9	109942450	109942451	10
chr9	109942451	109942467	9
chr9	109942467	109942468	11
chr9	109942468	109942469	12
chr9	109942469	109942474	10
chr9	109942474	109942486	8
chr9	109942486	109942487	11
chr9	109942487	109942489	10
chr9	109942489	109942493	11
chr9	109942493	109942495	12
chr9	109942495	109942505	11
chr9	109942505	109942508	12
chr9	109942508	109942512	10
chr9	109942512	109942517	12
chr9	109942517	109942530	13
chr9	109942530	109942538	15
chr9	109942538	109942546	16
chr9	109942546	109942550	17
chr9	109942550	109942564	16
chr9	109942564	109942567	19
chr9	109942567	109942568	17
chr9	109942568	109942586	16
chr9	109942586	109942589	13
chr9	109942589	109942593	12
chr9	109942593	109942600	11
chr9	109942600	109942605	13
chr9	109942605	109942612	12
chr9	109942612	109942617	10
chr9	109942617	109942630	9
chr9	109942630	109942631	7
chr9	109942631	109942636	8
chr9	109942636	109942638	9
chr9	109942638	109942639	8
chr9	109942639	109942646	10
chr9	109942646	109942650	9
chr9	109942650	109942664	10
chr9	109942664	109942683	7
chr9	109942683	109942700	9
chr9	109942700	109942707	7
chr9	109942707	109942731	8
chr9	109942731	109942736	7
chr9	109942736	109942739	6
chr9	109942739	109942751	4
chr9	109942751	109942753	5
chr9	109942753	109942755	8
chr9	109942755	109942763	9
chr9	109942763	109942783	12
chr9	109942783	109942807	10
chr9	109942807	109942815	9
chr9	109942815	109942837	10
chr9	109942837	109942850	13
chr9	109942850	109942851	12
chr9	109942851	109942853	11
chr9	109942853	109942855	8
chr9	109942855	109942863	11
chr9	109942863	109942891	8
chr9	109942891	109942896	11
chr9	109942896	109942915	13
chr9	109942915	109942937	12
chr9	109942937	109942955	9
chr9	109942955	109942971	5

## Sheet: M_Myocyte 60h
track type=wiggle_0 name="C2C12 Myoc Raw" description="C2C12 Myocyte 60 h RNA-seq Raw Signal from ENCODE/Caltech"
#bedGraph section chr9:109937407-109940093
chr9	109939792	109939793	392
chr9	109939793	109939794	397
chr9	109939794	109939796	404
chr9	109939796	109939797	406
chr9	109939797	109939798	366
chr9	109939798	109939799	360
chr9	109939799	109939800	359
chr9	109939800	109939802	358
chr9	109939802	109939803	352
chr9	109939803	109939804	354
chr9	109939804	109939805	370
chr9	109939805	109939807	369
chr9	109939807	109939808	371
chr9	109939808	109939809	359
chr9	109939809	109939810	372
chr9	109939810	109939811	368
chr9	109939811	109939812	379
chr9	109939812	109939813	375
chr9	109939813	109939814	369
chr9	109939814	109939815	365
chr9	109939815	109939817	348
chr9	109939817	109939818	354
chr9	109939818	109939819	356
chr9	109939819	109939820	363
chr9	109939820	109939821	358
chr9	109939821	109939822	356
chr9	109939822	109939823	358
chr9	109939823	109939824	356
chr9	109939824	109939825	354
chr9	109939825	109939826	345
chr9	109939826	109939828	344
chr9	109939828	109939829	343
chr9	109939829	109939830	346
chr9	109939830	109939831	343
chr9	109939831	109939832	342
chr9	109939832	109939833	341
chr9	109939833	109939834	339
chr9	109939834	109939835	343
chr9	109939835	109939837	351
chr9	109939837	109939838	354
chr9	109939838	109939844	352
chr9	109939844	109939846	355
chr9	109939846	109939847	354
chr9	109939847	109939849	348
chr9	109939849	109939850	349
chr9	109939850	109939851	356
chr9	109939851	109939852	353
chr9	109939852	109939853	355
chr9	109939853	109939854	351
chr9	109939854	109939855	346
chr9	109939855	109939856	343
chr9	109939856	109939857	324
chr9	109939857	109939859	319
chr9	109939859	109939860	345
chr9	109939860	109939861	334
chr9	109939861	109939862	323
chr9	109939862	109939863	320
chr9	109939863	109939865	321
chr9	109939865	109939866	320
chr9	109939866	109939867	322
chr9	109939867	109939868	324
chr9	109939868	109939870	322
chr9	109939870	109939871	332
chr9	109939871	109939872	331
chr9	109939872	109939873	337
chr9	109939873	109939874	336
chr9	109939874	109939875	337
chr9	109939875	109939876	333
chr9	109939876	109939877	323
chr9	109939877	109939878	321
chr9	109939878	109939880	320
chr9	109939880	109939881	326
chr9	109939881	109939882	310
chr9	109939882	109939883	315
chr9	109939883	109939884	319
chr9	109939884	109939885	318
chr9	109939885	109939886	321
chr9	109939886	109939887	317
chr9	109939887	109939888	320
chr9	109939888	109939889	318
chr9	109939889	109939890	319
chr9	109939890	109939891	321
chr9	109939891	109939892	317
chr9	109939892	109939893	321
chr9	109939893	109939894	320
chr9	109939894	109939896	315
chr9	109939896	109939897	312
chr9	109939897	109939898	305
chr9	109939898	109939899	303
chr9	109939899	109939900	301
chr9	109939900	109939901	302
chr9	109939901	109939902	303
chr9	109939902	109939903	302
chr9	109939903	109939904	299
chr9	109939904	109939906	281
chr9	109939906	109939907	283
chr9	109939907	109939908	285
chr9	109939908	109939909	281
chr9	109939909	109939911	284
chr9	109939911	109939912	274
chr9	109939912	109939913	278
chr9	109939913	109939914	280
chr9	109939914	109939915	284
chr9	109939915	109939917	289
chr9	109939917	109939918	284
chr9	109939918	109939919	286
chr9	109939919	109939920	289
chr9	109939920	109939921	287
chr9	109939921	109939922	288
chr9	109939922	109939924	289
chr9	109939924	109939925	297
chr9	109939925	109939926	298
chr9	109939926	109939927	306
chr9	109939927	109939929	307
chr9	109939929	109939930	305
chr9	109939930	109939932	301
chr9	109939932	109939933	304
chr9	109939933	109939934	308
chr9	109939934	109939935	303
chr9	109939935	109939936	295
chr9	109939936	109939937	297
chr9	109939937	109939938	301
chr9	109939938	109939939	305
chr9	109939939	109939940	307
chr9	109939940	109939941	306
chr9	109939941	109939942	307
chr9	109939942	109939943	306
chr9	109939943	109939944	311
chr9	109939944	109939946	306
chr9	109939946	109939947	314
chr9	109939947	109939948	320
chr9	109939948	109939949	344
chr9	109939949	109939950	349
chr9	109939950	109939952	339
chr9	109939952	109939954	338
chr9	109939954	109939955	349
chr9	109939955	109939956	353
chr9	109939956	109939957	355
chr9	109939957	109939958	357
chr9	109939958	109939959	359
chr9	109939959	109939960	338
chr9	109939960	109939961	335
chr9	109939961	109939962	330
chr9	109939962	109939963	329
chr9	109939963	109939964	326
chr9	109939964	109939965	327
chr9	109939965	109939966	331
chr9	109939966	109939967	329
chr9	109939967	109939968	328
chr9	109939968	109939969	335
chr9	109939969	109939970	336
chr9	109939970	109939971	323
chr9	109939971	109939972	325
chr9	109939972	109939973	320
chr9	109939973	109939974	324
chr9	109939974	109939977	327
chr9	109939977	109939978	325
chr9	109939978	109939979	336
chr9	109939979	109939980	338
chr9	109939980	109939981	334
chr9	109939981	109939982	340
chr9	109939982	109939983	339
chr9	109939983	109939984	347
chr9	109939984	109939985	348
chr9	109939985	109939986	346
chr9	109939986	109939987	345
chr9	109939987	109939988	343
chr9	109939988	109939990	342
chr9	109939990	109939991	341
chr9	109939991	109939992	343
chr9	109939992	109939993	336
chr9	109939993	109939994	333
chr9	109939994	109939998	334
chr9	109939998	109939999	330
chr9	109939999	109940000	334
chr9	109940000	109940001	333
chr9	109940001	109940003	334
chr9	109940003	109940004	336
chr9	109940004	109940005	341
chr9	109940005	109940006	342
chr9	109940006	109940007	340
chr9	109940007	109940008	338
chr9	109940008	109940009	343
chr9	109940009	109940010	348
chr9	109940010	109940011	353
chr9	109940011	109940012	354
chr9	109940012	109940013	351
chr9	109940013	109940014	353
chr9	109940014	109940015	346
chr9	109940015	109940016	345
chr9	109940016	109940018	342
chr9	109940018	109940019	338
chr9	109940019	109940020	332
chr9	109940020	109940021	327
chr9	109940021	109940022	326
chr9	109940022	109940023	324
chr9	109940023	109940024	326
chr9	109940024	109940025	319
chr9	109940025	109940026	317
chr9	109940026	109940027	310
chr9	109940027	109940029	309
chr9	109940029	109940032	312
chr9	109940032	109940033	309
chr9	109940033	109940034	308
chr9	109940034	109940035	307
chr9	109940035	109940037	309
chr9	109940037	109940038	303
chr9	109940038	109940039	313
chr9	109940039	109940040	312
chr9	109940040	109940041	314
chr9	109940041	109940042	315
chr9	109940042	109940043	320
chr9	109940043	109940044	316
chr9	109940044	109940045	335
chr9	109940045	109940046	346
chr9	109940046	109940047	347
chr9	109940047	109940048	339
chr9	109940048	109940049	314
chr9	109940049	109940050	310
chr9	109940050	109940051	313
chr9	109940051	109940052	315
chr9	109940052	109940053	321
chr9	109940053	109940054	332
chr9	109940054	109940055	333
chr9	109940055	109940056	332
chr9	109940056	109940057	341
chr9	109940057	109940059	342
chr9	109940059	109940060	339
chr9	109940060	109940061	336
chr9	109940061	109940062	343
chr9	109940062	109940063	349
chr9	109940063	109940064	352
chr9	109940064	109940065	364
chr9	109940065	109940067	362
chr9	109940067	109940068	372
chr9	109940068	109940069	364
chr9	109940069	109940070	366
chr9	109940070	109940071	374
chr9	109940071	109940072	372
chr9	109940072	109940073	371
chr9	109940073	109940074	372
chr9	109940074	109940075	370
chr9	109940075	109940076	371
chr9	109940076	109940077	376
chr9	109940077	109940078	394
chr9	109940078	109940079	384
chr9	109940079	109940080	389
chr9	109940080	109940081	392
chr9	109940081	109940082	389
chr9	109940082	109940083	382
chr9	109940083	109940084	374
chr9	109940084	109940085	371
chr9	109940085	109940086	372
chr9	109940086	109940087	388
chr9	109940087	109940088	392
chr9	109940088	109940089	400
chr9	109940089	109940090	403
chr9	109940090	109940091	419
chr9	109940091	109940092	426
chr9	109940092	109940093	424
#bedGraph section chr9:109940093-109941220
chr9	109940093	109940095	431
chr9	109940095	109940096	436
chr9	109940096	109940097	445
chr9	109940097	109940098	448
chr9	109940098	109940099	454
chr9	109940099	109940100	460
chr9	109940100	109940101	481
chr9	109940101	109940102	485
chr9	109940102	109940103	494
chr9	109940103	109940104	501
chr9	109940104	109940105	519
chr9	109940105	109940106	521
chr9	109940106	109940108	525
chr9	109940108	109940109	522
chr9	109940109	109940110	515
chr9	109940110	109940111	510
chr9	109940111	109940112	547
chr9	109940112	109940113	558
chr9	109940113	109940114	562
chr9	109940114	109940115	563
chr9	109940115	109940116	560
chr9	109940116	109940117	566
chr9	109940117	109940118	571
chr9	109940118	109940119	573
chr9	109940119	109940120	594
chr9	109940120	109940124	596
chr9	109940124	109940125	603
chr9	109940125	109940126	606
chr9	109940126	109940127	609
chr9	109940127	109940128	614
chr9	109940128	109940129	631
chr9	109940129	109940130	629
chr9	109940130	109940132	630
chr9	109940132	109940133	631
chr9	109940133	109940134	641
chr9	109940134	109940135	652
chr9	109940135	109940136	653
chr9	109940136	109940138	655
chr9	109940138	109940140	643
chr9	109940140	109940141	664
chr9	109940141	109940142	665
chr9	109940142	109940143	660
chr9	109940143	109940144	693
chr9	109940144	109940145	678
chr9	109940145	109940146	667
chr9	109940146	109940150	661
chr9	109940150	109940151	662
chr9	109940151	109940152	670
chr9	109940152	109940153	662
chr9	109940153	109940154	653
chr9	109940154	109940155	649
chr9	109940155	109940156	654
chr9	109940156	109940157	647
chr9	109940157	109940158	645
chr9	109940158	109940159	658
chr9	109940159	109940160	675
chr9	109940160	109940161	684
chr9	109940161	109940162	682
chr9	109940162	109940163	691
chr9	109940163	109940164	688
chr9	109940164	109940165	682
chr9	109940165	109940166	684
chr9	109940166	109940167	687
chr9	109940167	109940168	676
chr9	109940168	109940169	684
chr9	109940169	109940170	712
chr9	109940170	109940171	708
chr9	109940171	109940172	711
chr9	109940172	109940173	715
chr9	109940173	109940174	721
chr9	109940174	109940175	722
chr9	109940175	109940176	728
chr9	109940176	109940177	725
chr9	109940177	109940178	708
chr9	109940178	109940179	739
chr9	109940179	109940180	745
chr9	109940180	109940181	778
chr9	109940181	109940182	805
chr9	109940182	109940183	825
chr9	109940183	109940186	826
chr9	109940186	109940187	814
chr9	109940187	109940188	824
chr9	109940188	109940189	830
chr9	109940189	109940190	837
chr9	109940190	109940192	820
chr9	109940192	109940193	828
chr9	109940193	109940194	831
chr9	109940194	109940195	832
chr9	109940195	109940196	828
chr9	109940196	109940197	823
chr9	109940197	109940198	843
chr9	109940198	109940199	858
chr9	109940199	109940200	866
chr9	109940200	109940201	850
chr9	109940201	109940202	849
chr9	109940202	109940204	841
chr9	109940204	109940205	828
chr9	109940205	109940206	832
chr9	109940206	109940207	833
chr9	109940207	109940208	831
chr9	109940208	109940209	839
chr9	109940209	109940210	838
chr9	109940210	109940211	850
chr9	109940211	109940212	831
chr9	109940212	109940213	820
chr9	109940213	109940214	816
chr9	109940214	109940215	818
chr9	109940215	109940218	819
chr9	109940218	109940219	825
chr9	109940219	109940220	803
chr9	109940220	109940221	800
chr9	109940221	109940223	802
chr9	109940223	109940224	801
chr9	109940224	109940225	798
chr9	109940225	109940226	808
chr9	109940226	109940227	805
chr9	109940227	109940228	800
chr9	109940228	109940229	784
chr9	109940229	109940230	797
chr9	109940230	109940231	801
chr9	109940231	109940233	804
chr9	109940233	109940234	793
chr9	109940234	109940235	794
chr9	109940235	109940236	797
chr9	109940236	109940237	813
chr9	109940237	109940238	814
chr9	109940238	109940239	810
chr9	109940239	109940240	823
chr9	109940240	109940241	799
chr9	109940241	109940242	816
chr9	109940242	109940243	818
chr9	109940243	109940244	786
chr9	109940244	109940245	784
chr9	109940245	109940246	782
chr9	109940246	109940248	789
chr9	109940248	109940249	794
chr9	109940249	109940250	800
chr9	109940250	109940251	795
chr9	109940251	109940252	792
chr9	109940252	109940253	793
chr9	109940253	109940254	794
chr9	109940254	109940255	805
chr9	109940255	109940256	797
chr9	109940256	109940257	795
chr9	109940257	109940258	801
chr9	109940258	109940259	790
chr9	109940259	109940260	774
chr9	109940260	109940261	777
chr9	109940261	109940262	779
chr9	109940262	109940263	770
chr9	109940263	109940264	774
chr9	109940264	109940265	767
chr9	109940265	109940266	765
chr9	109940266	109940267	770
chr9	109940267	109940268	786
chr9	109940268	109940269	791
chr9	109940269	109940270	766
chr9	109940270	109940271	763
chr9	109940271	109940272	758
chr9	109940272	109940273	769
chr9	109940273	109940274	759
chr9	109940274	109940275	758
chr9	109940275	109940276	756
chr9	109940276	109940277	783
chr9	109940277	109940278	788
chr9	109940278	109940279	763
chr9	109940279	109940280	757
chr9	109940280	109940281	721
chr9	109940281	109940282	694
chr9	109940282	109940283	674
chr9	109940283	109940284	669
chr9	109940284	109940285	670
chr9	109940285	109940286	669
chr9	109940286	109940287	665
chr9	109940287	109940288	652
chr9	109940288	109940289	641
chr9	109940289	109940291	638
chr9	109940291	109940292	629
chr9	109940292	109940293	619
chr9	109940293	109940294	622
chr9	109940294	109940295	630
chr9	109940295	109940296	634
chr9	109940296	109940297	631
chr9	109940297	109940298	616
chr9	109940298	109940299	601
chr9	109940299	109940300	585
chr9	109940300	109940302	589
chr9	109940302	109940303	590
chr9	109940303	109940304	584
chr9	109940304	109940305	573
chr9	109940305	109940306	571
chr9	109940306	109940307	569
chr9	109940307	109940308	613
chr9	109940308	109940309	621
chr9	109940309	109940311	630
chr9	109940311	109940312	610
chr9	109940312	109940313	612
chr9	109940313	109940314	609
chr9	109940314	109940315	612
chr9	109940315	109940316	621
chr9	109940316	109940317	617
chr9	109940317	109940318	613
chr9	109940318	109940319	615
chr9	109940319	109940320	625
chr9	109940320	109940321	645
chr9	109940321	109940322	653
chr9	109940322	109940323	663
chr9	109940323	109940324	662
chr9	109940324	109940325	678
chr9	109940325	109940326	694
chr9	109940326	109940327	708
chr9	109940327	109940328	710
chr9	109940328	109940329	709
chr9	109940329	109940330	696
chr9	109940330	109940331	699
chr9	109940331	109940332	696
chr9	109940332	109940333	706
chr9	109940333	109940334	705
chr9	109940334	109940335	693
chr9	109940335	109940336	689
chr9	109940336	109940337	671
chr9	109940337	109940338	670
chr9	109940338	109940339	674
chr9	109940339	109940340	660
chr9	109940340	109940341	659
chr9	109940341	109940342	644
chr9	109940342	109940343	645
chr9	109940343	109940344	647
chr9	109940344	109940346	646
chr9	109940346	109940347	638
chr9	109940347	109940348	639
chr9	109940348	109940349	638
chr9	109940349	109940350	635
chr9	109940350	109940351	638
chr9	109940351	109940352	632
chr9	109940352	109940353	631
chr9	109940353	109940354	629
chr9	109940354	109940355	619
chr9	109940355	109940356	617
chr9	109940356	109940357	621
chr9	109940357	109940358	615
chr9	109940358	109940359	610
chr9	109940359	109940360	606
chr9	109940360	109940361	595
chr9	109940361	109940362	617
chr9	109940362	109940363	637
chr9	109940363	109940364	638
chr9	109940364	109940365	649
chr9	109940365	109940366	672
chr9	109940366	109940367	665
chr9	109940367	109940368	655
chr9	109940368	109940369	642
chr9	109940369	109940371	657
chr9	109940371	109940372	668
chr9	109940372	109940373	656
chr9	109940373	109940374	659
chr9	109940374	109940375	661
chr9	109940375	109940376	655
chr9	109940376	109940377	642
chr9	109940377	109940378	641
chr9	109940378	109940379	642
chr9	109940379	109940380	637
chr9	109940380	109940381	640
chr9	109940381	109940382	636
chr9	109940382	109940383	639
chr9	109940383	109940384	644
chr9	109940384	109940385	649
chr9	109940385	109940386	654
chr9	109940386	109940388	660
chr9	109940388	109940389	669
chr9	109940389	109940390	678
chr9	109940390	109940391	682
chr9	109940391	109940392	687
chr9	109940392	109940393	686
chr9	109940393	109940394	673
chr9	109940394	109940395	672
chr9	109940395	109940396	677
chr9	109940396	109940397	679
chr9	109940397	109940398	673
chr9	109940398	109940399	668
chr9	109940399	109940400	681
chr9	109940400	109940401	675
chr9	109940401	109940402	671
chr9	109940402	109940403	668
chr9	109940403	109940404	665
chr9	109940404	109940405	668
chr9	109940405	109940407	672
chr9	109940407	109940408	630
chr9	109940408	109940409	612
chr9	109940409	109940410	605
chr9	109940410	109940411	601
chr9	109940411	109940412	606
chr9	109940412	109940414	604
chr9	109940414	109940415	600
chr9	109940415	109940416	589
chr9	109940416	109940417	591
chr9	109940417	109940418	597
chr9	109940418	109940419	585
chr9	109940419	109940420	572
chr9	109940420	109940421	556
chr9	109940421	109940422	546
chr9	109940422	109940423	550
chr9	109940423	109940424	552
chr9	109940424	109940425	542
chr9	109940425	109940426	513
chr9	109940426	109940428	503
chr9	109940428	109940430	502
chr9	109940430	109940431	495
chr9	109940431	109940432	497
chr9	109940432	109940434	489
chr9	109940434	109940435	491
chr9	109940435	109940436	490
chr9	109940436	109940437	489
chr9	109940437	109940438	497
chr9	109940438	109940439	501
chr9	109940439	109940440	512
chr9	109940440	109940441	523
chr9	109940441	109940442	519
chr9	109940442	109940443	526
chr9	109940443	109940444	523
chr9	109940444	109940445	527
chr9	109940445	109940446	534
chr9	109940446	109940447	584
chr9	109940447	109940448	586
chr9	109940448	109940450	593
chr9	109940450	109940451	592
chr9	109940451	109940452	591
chr9	109940452	109940453	596
chr9	109940453	109940454	594
chr9	109940454	109940456	588
chr9	109940456	109940458	582
chr9	109940458	109940459	595
chr9	109940459	109940461	598
chr9	109940461	109940462	572
chr9	109940462	109940463	552
chr9	109940463	109940464	578
chr9	109940464	109940465	567
chr9	109940465	109940466	542
chr9	109940466	109940467	541
chr9	109940467	109940468	543
chr9	109940468	109940469	544
chr9	109940469	109940470	533
chr9	109940470	109940471	534
chr9	109940471	109940473	528
chr9	109940473	109940475	526
chr9	109940475	109940476	528
chr9	109940476	109940477	514
chr9	109940477	109940478	519
chr9	109940478	109940479	515
chr9	109940479	109940480	513
chr9	109940480	109940481	508
chr9	109940481	109940482	516
chr9	109940482	109940483	520
chr9	109940483	109940484	524
chr9	109940484	109940485	525
chr9	109940485	109940486	527
chr9	109940486	109940487	525
chr9	109940487	109940488	532
chr9	109940488	109940489	523
chr9	109940489	109940490	517
chr9	109940490	109940491	522
chr9	109940491	109940492	519
chr9	109940492	109940493	520
chr9	109940493	109940494	527
chr9	109940494	109940495	518
chr9	109940495	109940496	512
chr9	109940496	109940497	515
chr9	109940497	109940498	518
chr9	109940498	109940499	521
chr9	109940499	109940500	506
chr9	109940500	109940501	510
chr9	109940501	109940502	511
chr9	109940502	109940503	510
chr9	109940503	109940504	528
chr9	109940504	109940505	525
chr9	109940505	109940506	520
chr9	109940506	109940507	524
chr9	109940507	109940508	522
chr9	109940508	109940509	528
chr9	109940509	109940510	531
chr9	109940510	109940511	525
chr9	109940511	109940512	541
chr9	109940512	109940513	540
chr9	109940513	109940514	547
chr9	109940514	109940515	543
chr9	109940515	109940516	553
chr9	109940516	109940517	551
chr9	109940517	109940518	545
chr9	109940518	109940520	544
chr9	109940520	109940521	540
chr9	109940521	109940522	542
chr9	109940522	109940523	530
chr9	109940523	109940524	536
chr9	109940524	109940525	525
chr9	109940525	109940526	526
chr9	109940526	109940527	525
chr9	109940527	109940528	523
chr9	109940528	109940529	525
chr9	109940529	109940530	524
chr9	109940530	109940531	526
chr9	109940531	109940532	527
chr9	109940532	109940533	525
chr9	109940533	109940534	524
chr9	109940534	109940535	527
chr9	109940535	109940536	533
chr9	109940536	109940537	547
chr9	109940537	109940538	539
chr9	109940538	109940539	531
chr9	109940539	109940540	522
chr9	109940540	109940542	512
chr9	109940542	109940544	503
chr9	109940544	109940545	501
chr9	109940545	109940546	494
chr9	109940546	109940547	443
chr9	109940547	109940548	446
chr9	109940548	109940549	434
chr9	109940549	109940550	428
chr9	109940550	109940551	431
chr9	109940551	109940552	435
chr9	109940552	109940554	433
chr9	109940554	109940555	430
chr9	109940555	109940557	432
chr9	109940557	109940558	438
chr9	109940558	109940559	425
chr9	109940559	109940561	422
chr9	109940561	109940562	421
chr9	109940562	109940563	417
chr9	109940563	109940564	386
chr9	109940564	109940565	394
chr9	109940565	109940566	398
chr9	109940566	109940567	404
chr9	109940567	109940568	396
chr9	109940568	109940569	400
chr9	109940569	109940570	391
chr9	109940570	109940571	389
chr9	109940571	109940572	383
chr9	109940572	109940573	399
chr9	109940573	109940574	403
chr9	109940574	109940575	401
chr9	109940575	109940576	399
chr9	109940576	109940577	398
chr9	109940577	109940578	388
chr9	109940578	109940579	392
chr9	109940579	109940580	468
chr9	109940580	109940581	472
chr9	109940581	109940582	483
chr9	109940582	109940583	485
chr9	109940583	109940584	479
chr9	109940584	109940585	472
chr9	109940585	109940586	470
chr9	109940586	109940587	478
chr9	109940587	109940589	483
chr9	109940589	109940590	474
chr9	109940590	109940591	465
chr9	109940591	109940592	464
chr9	109940592	109940593	482
chr9	109940593	109940595	477
chr9	109940595	109940597	479
chr9	109940597	109940598	475
chr9	109940598	109940600	473
chr9	109940600	109940601	477
chr9	109940601	109940602	476
chr9	109940602	109940603	479
chr9	109940603	109940604	465
chr9	109940604	109940605	469
chr9	109940605	109940606	484
chr9	109940606	109940607	496
chr9	109940607	109940608	505
chr9	109940608	109940609	500
chr9	109940609	109940610	501
chr9	109940610	109940611	521
chr9	109940611	109940612	512
chr9	109940612	109940613	540
chr9	109940613	109940614	535
chr9	109940614	109940615	554
chr9	109940615	109940616	565
chr9	109940616	109940617	571
chr9	109940617	109940618	573
chr9	109940618	109940619	574
chr9	109940619	109940620	577
chr9	109940620	109940621	582
chr9	109940621	109940622	584
chr9	109940622	109940623	589
chr9	109940623	109940624	581
chr9	109940624	109940625	584
chr9	109940625	109940626	583
chr9	109940626	109940627	580
chr9	109940627	109940629	593
chr9	109940629	109940630	594
chr9	109940630	109940631	591
chr9	109940631	109940632	588
chr9	109940632	109940633	590
chr9	109940633	109940634	591
chr9	109940634	109940635	589
chr9	109940635	109940636	584
chr9	109940636	109940637	569
chr9	109940637	109940638	567
chr9	109940638	109940639	569
chr9	109940639	109940640	589
chr9	109940640	109940641	592
chr9	109940641	109940642	599
chr9	109940642	109940643	598
chr9	109940643	109940644	597
chr9	109940644	109940645	598
chr9	109940645	109940646	608
chr9	109940646	109940647	643
chr9	109940647	109940648	636
chr9	109940648	109940649	639
chr9	109940649	109940650	643
chr9	109940650	109940651	639
chr9	109940651	109940652	655
chr9	109940652	109940653	658
chr9	109940653	109940654	660
chr9	109940654	109940655	661
chr9	109940655	109940656	660
chr9	109940656	109940657	665
chr9	109940657	109940658	660
chr9	109940658	109940659	668
chr9	109940659	109940660	669
chr9	109940660	109940661	671
chr9	109940661	109940662	672
chr9	109940662	109940663	680
chr9	109940663	109940664	681
chr9	109940664	109940665	672
chr9	109940665	109940666	675
chr9	109940666	109940669	679
chr9	109940669	109940670	683
chr9	109940670	109940671	688
chr9	109940671	109940672	691
chr9	109940672	109940673	677
chr9	109940673	109940674	676
chr9	109940674	109940675	680
chr9	109940675	109940676	685
chr9	109940676	109940677	701
chr9	109940677	109940678	707
chr9	109940678	109940679	708
chr9	109940679	109940680	631
chr9	109940680	109940681	630
chr9	109940681	109940682	623
chr9	109940682	109940683	622
chr9	109940683	109940684	628
chr9	109940684	109940685	668
chr9	109940685	109940686	663
chr9	109940686	109940687	658
chr9	109940687	109940688	647
chr9	109940688	109940689	650
chr9	109940689	109940690	666
chr9	109940690	109940691	680
chr9	109940691	109940692	688
chr9	109940692	109940693	670
chr9	109940693	109940694	666
chr9	109940694	109940695	667
chr9	109940695	109940696	663
chr9	109940696	109940697	660
chr9	109940697	109940698	663
chr9	109940698	109940700	660
chr9	109940700	109940701	651
chr9	109940701	109940702	650
chr9	109940702	109940703	652
chr9	109940703	109940704	649
chr9	109940704	109940705	648
chr9	109940705	109940706	631
chr9	109940706	109940707	613
chr9	109940707	109940709	605
chr9	109940709	109940710	606
chr9	109940710	109940711	585
chr9	109940711	109940712	580
chr9	109940712	109940713	554
chr9	109940713	109940714	552
chr9	109940714	109940715	543
chr9	109940715	109940716	525
chr9	109940716	109940717	519
chr9	109940717	109940718	518
chr9	109940718	109940719	521
chr9	109940719	109940720	517
chr9	109940720	109940721	512
chr9	109940721	109940722	510
chr9	109940722	109940723	505
chr9	109940723	109940724	513
chr9	109940724	109940727	521
chr9	109940727	109940728	512
chr9	109940728	109940729	518
chr9	109940729	109940730	517
chr9	109940730	109940731	521
chr9	109940731	109940732	523
chr9	109940732	109940733	522
chr9	109940733	109940734	523
chr9	109940734	109940735	527
chr9	109940735	109940736	534
chr9	109940736	109940737	536
chr9	109940737	109940738	538
chr9	109940738	109940739	536
chr9	109940739	109940740	517
chr9	109940740	109940741	514
chr9	109940741	109940743	512
chr9	109940743	109940744	513
chr9	109940744	109940745	522
chr9	109940745	109940746	513
chr9	109940746	109940747	485
chr9	109940747	109940748	495
chr9	109940748	109940749	510
chr9	109940749	109940750	507
chr9	109940750	109940751	506
chr9	109940751	109940752	501
chr9	109940752	109940753	502
chr9	109940753	109940754	513
chr9	109940754	109940755	528
chr9	109940755	109940756	536
chr9	109940756	109940757	537
chr9	109940757	109940758	541
chr9	109940758	109940759	544
chr9	109940759	109940760	546
chr9	109940760	109940761	544
chr9	109940761	109940762	545
chr9	109940762	109940764	557
chr9	109940764	109940765	561
chr9	109940765	109940766	555
chr9	109940766	109940767	546
chr9	109940767	109940768	548
chr9	109940768	109940769	545
chr9	109940769	109940770	540
chr9	109940770	109940771	538
chr9	109940771	109940772	542
chr9	109940772	109940774	537
chr9	109940774	109940775	539
chr9	109940775	109940776	541
chr9	109940776	109940777	537
chr9	109940777	109940778	531
chr9	109940778	109940779	524
chr9	109940779	109940780	528
chr9	109940780	109940781	529
chr9	109940781	109940782	516
chr9	109940782	109940783	510
chr9	109940783	109940784	503
chr9	109940784	109940785	466
chr9	109940785	109940786	467
chr9	109940786	109940787	463
chr9	109940787	109940788	458
chr9	109940788	109940789	452
chr9	109940789	109940791	433
chr9	109940791	109940792	427
chr9	109940792	109940794	428
chr9	109940794	109940795	425
chr9	109940795	109940796	438
chr9	109940796	109940797	446
chr9	109940797	109940798	450
chr9	109940798	109940799	456
chr9	109940799	109940800	459
chr9	109940800	109940801	461
chr9	109940801	109940802	464
chr9	109940802	109940803	461
chr9	109940803	109940804	462
chr9	109940804	109940805	461
chr9	109940805	109940806	475
chr9	109940806	109940807	474
chr9	109940807	109940809	475
chr9	109940809	109940810	468
chr9	109940810	109940811	471
chr9	109940811	109940812	480
chr9	109940812	109940813	482
chr9	109940813	109940814	484
chr9	109940814	109940815	475
chr9	109940815	109940816	474
chr9	109940816	109940818	471
chr9	109940818	109940819	468
chr9	109940819	109940821	470
chr9	109940821	109940822	468
chr9	109940822	109940823	466
chr9	109940823	109940824	459
chr9	109940824	109940825	461
chr9	109940825	109940826	474
chr9	109940826	109940827	473
chr9	109940827	109940828	474
chr9	109940828	109940829	475
chr9	109940829	109940830	478
chr9	109940830	109940831	487
chr9	109940831	109940832	488
chr9	109940832	109940833	493
chr9	109940833	109940834	495
chr9	109940834	109940835	489
chr9	109940835	109940836	504
chr9	109940836	109940837	506
chr9	109940837	109940838	504
chr9	109940838	109940839	509
chr9	109940839	109940840	512
chr9	109940840	109940841	523
chr9	109940841	109940842	518
chr9	109940842	109940844	528
chr9	109940844	109940845	516
chr9	109940845	109940846	525
chr9	109940846	109940848	522
chr9	109940848	109940849	510
chr9	109940849	109940850	512
chr9	109940850	109940851	516
chr9	109940851	109940852	507
chr9	109940852	109940853	500
chr9	109940853	109940854	489
chr9	109940854	109940855	478
chr9	109940855	109940857	477
chr9	109940857	109940858	472
chr9	109940858	109940859	471
chr9	109940859	109940860	469
chr9	109940860	109940861	471
chr9	109940861	109940862	481
chr9	109940862	109940863	459
chr9	109940863	109940864	462
chr9	109940864	109940865	458
chr9	109940865	109940866	461
chr9	109940866	109940867	480
chr9	109940867	109940868	478
chr9	109940868	109940869	484
chr9	109940869	109940870	487
chr9	109940870	109940871	485
chr9	109940871	109940872	487
chr9	109940872	109940873	490
chr9	109940873	109940874	488
chr9	109940874	109940875	484
chr9	109940875	109940876	486
chr9	109940876	109940878	477
chr9	109940878	109940879	478
chr9	109940879	109940880	487
chr9	109940880	109940881	486
chr9	109940881	109940882	490
chr9	109940882	109940883	491
chr9	109940883	109940884	492
chr9	109940884	109940885	490
chr9	109940885	109940886	501
chr9	109940886	109940887	497
chr9	109940887	109940888	498
chr9	109940888	109940889	500
chr9	109940889	109940890	506
chr9	109940890	109940892	494
chr9	109940892	109940893	514
chr9	109940893	109940894	524
chr9	109940894	109940895	541
chr9	109940895	109940896	527
chr9	109940896	109940897	516
chr9	109940897	109940898	512
chr9	109940898	109940899	507
chr9	109940899	109940900	521
chr9	109940900	109940901	526
chr9	109940901	109940905	537
chr9	109940905	109940906	525
chr9	109940906	109940907	528
chr9	109940907	109940908	554
chr9	109940908	109940909	578
chr9	109940909	109940910	591
chr9	109940910	109940911	587
chr9	109940911	109940912	574
chr9	109940912	109940913	571
chr9	109940913	109940914	577
chr9	109940914	109940916	581
chr9	109940916	109940917	589
chr9	109940917	109940918	591
chr9	109940918	109940919	589
chr9	109940919	109940920	587
chr9	109940920	109940921	591
chr9	109940921	109940922	594
chr9	109940922	109940923	597
chr9	109940923	109940924	599
chr9	109940924	109940925	588
chr9	109940925	109940926	575
chr9	109940926	109940927	577
chr9	109940927	109940928	573
chr9	109940928	109940929	568
chr9	109940929	109940930	566
chr9	109940930	109940931	553
chr9	109940931	109940932	552
chr9	109940932	109940933	558
chr9	109940933	109940934	559
chr9	109940934	109940935	565
chr9	109940935	109940936	555
chr9	109940936	109940937	551
chr9	109940937	109940938	554
chr9	109940938	109940939	559
chr9	109940939	109940940	564
chr9	109940940	109940942	578
chr9	109940942	109940944	569
chr9	109940944	109940945	568
chr9	109940945	109940946	559
chr9	109940946	109940947	556
chr9	109940947	109940949	546
chr9	109940949	109940950	545
chr9	109940950	109940951	550
chr9	109940951	109940953	544
chr9	109940953	109940954	542
chr9	109940954	109940955	543
chr9	109940955	109940956	536
chr9	109940956	109940957	535
chr9	109940957	109940958	537
chr9	109940958	109940959	525
chr9	109940959	109940960	527
chr9	109940960	109940961	525
chr9	109940961	109940962	519
chr9	109940962	109940963	518
chr9	109940963	109940964	520
chr9	109940964	109940965	537
chr9	109940965	109940966	544
chr9	109940966	109940967	524
chr9	109940967	109940968	526
chr9	109940968	109940969	521
chr9	109940969	109940970	520
chr9	109940970	109940971	531
chr9	109940971	109940972	522
chr9	109940972	109940973	519
chr9	109940973	109940974	517
chr9	109940974	109940975	515
chr9	109940975	109940976	514
chr9	109940976	109940977	511
chr9	109940977	109940978	509
chr9	109940978	109940979	513
chr9	109940979	109940980	503
chr9	109940980	109940982	504
chr9	109940982	109940983	507
chr9	109940983	109940984	513
chr9	109940984	109940985	512
chr9	109940985	109940986	508
chr9	109940986	109940987	510
chr9	109940987	109940988	511
chr9	109940988	109940989	510
chr9	109940989	109940990	507
chr9	109940990	109940991	524
chr9	109940991	109940992	523
chr9	109940992	109940993	505
chr9	109940993	109940994	496
chr9	109940994	109940995	480
chr9	109940995	109940996	483
chr9	109940996	109940997	487
chr9	109940997	109940998	485
chr9	109940998	109940999	484
chr9	109940999	109941000	469
chr9	109941000	109941001	460
chr9	109941001	109941002	447
chr9	109941002	109941003	445
chr9	109941003	109941004	447
chr9	109941004	109941005	455
chr9	109941005	109941006	463
chr9	109941006	109941007	460
chr9	109941007	109941008	438
chr9	109941008	109941009	416
chr9	109941009	109941011	406
chr9	109941011	109941012	409
chr9	109941012	109941013	426
chr9	109941013	109941014	424
chr9	109941014	109941015	422
chr9	109941015	109941016	427
chr9	109941016	109941017	435
chr9	109941017	109941018	433
chr9	109941018	109941019	445
chr9	109941019	109941020	451
chr9	109941020	109941023	453
chr9	109941023	109941024	452
chr9	109941024	109941025	458
chr9	109941025	109941026	462
chr9	109941026	109941027	461
chr9	109941027	109941028	462
chr9	109941028	109941029	479
chr9	109941029	109941030	487
chr9	109941030	109941031	489
chr9	109941031	109941032	512
chr9	109941032	109941033	509
chr9	109941033	109941034	504
chr9	109941034	109941035	497
chr9	109941035	109941036	483
chr9	109941036	109941037	486
chr9	109941037	109941038	490
chr9	109941038	109941039	481
chr9	109941039	109941040	473
chr9	109941040	109941041	448
chr9	109941041	109941043	452
chr9	109941043	109941044	451
chr9	109941044	109941045	452
chr9	109941045	109941046	451
chr9	109941046	109941047	452
chr9	109941047	109941048	466
chr9	109941048	109941050	462
chr9	109941050	109941051	458
chr9	109941051	109941052	460
chr9	109941052	109941054	462
chr9	109941054	109941056	458
chr9	109941056	109941057	455
chr9	109941057	109941058	452
chr9	109941058	109941059	454
chr9	109941059	109941060	451
chr9	109941060	109941061	459
chr9	109941061	109941063	456
chr9	109941063	109941064	450
chr9	109941064	109941065	441
chr9	109941065	109941066	431
chr9	109941066	109941067	433
chr9	109941067	109941068	443
chr9	109941068	109941069	440
chr9	109941069	109941070	442
chr9	109941070	109941071	436
chr9	109941071	109941072	442
chr9	109941072	109941074	446
chr9	109941074	109941075	452
chr9	109941075	109941076	450
chr9	109941076	109941077	461
chr9	109941077	109941078	463
chr9	109941078	109941079	459
chr9	109941079	109941080	466
chr9	109941080	109941081	471
chr9	109941081	109941082	468
chr9	109941082	109941083	461
chr9	109941083	109941084	464
chr9	109941084	109941085	469
chr9	109941085	109941087	461
chr9	109941087	109941089	463
chr9	109941089	109941090	462
chr9	109941090	109941092	445
chr9	109941092	109941093	454
chr9	109941093	109941094	455
chr9	109941094	109941095	457
chr9	109941095	109941096	453
chr9	109941096	109941097	452
chr9	109941097	109941098	451
chr9	109941098	109941099	452
chr9	109941099	109941100	451
chr9	109941100	109941101	458
chr9	109941101	109941102	462
chr9	109941102	109941103	464
chr9	109941103	109941104	479
chr9	109941104	109941105	470
chr9	109941105	109941106	459
chr9	109941106	109941107	463
chr9	109941107	109941108	460
chr9	109941108	109941109	465
chr9	109941109	109941110	484
chr9	109941110	109941111	522
chr9	109941111	109941112	521
chr9	109941112	109941113	504
chr9	109941113	109941114	521
chr9	109941114	109941115	524
chr9	109941115	109941116	535
chr9	109941116	109941117	522
chr9	109941117	109941118	537
chr9	109941118	109941119	527
chr9	109941119	109941120	540
chr9	109941120	109941121	541
chr9	109941121	109941122	547
chr9	109941122	109941123	545
chr9	109941123	109941124	555
chr9	109941124	109941125	596
chr9	109941125	109941126	593
chr9	109941126	109941127	598
chr9	109941127	109941128	601
chr9	109941128	109941129	596
chr9	109941129	109941130	586
chr9	109941130	109941131	588
chr9	109941131	109941132	564
chr9	109941132	109941133	556
chr9	109941133	109941135	559
chr9	109941135	109941136	560
chr9	109941136	109941137	567
chr9	109941137	109941138	574
chr9	109941138	109941139	573
chr9	109941139	109941140	570
chr9	109941140	109941141	573
chr9	109941141	109941142	571
chr9	109941142	109941143	572
chr9	109941143	109941144	577
chr9	109941144	109941145	578
chr9	109941145	109941146	593
chr9	109941146	109941147	592
chr9	109941147	109941148	579
chr9	109941148	109941150	577
chr9	109941150	109941151	587
chr9	109941151	109941152	599
chr9	109941152	109941153	601
chr9	109941153	109941154	604
chr9	109941154	109941155	610
chr9	109941155	109941156	615
chr9	109941156	109941157	614
chr9	109941157	109941158	616
chr9	109941158	109941159	614
chr9	109941159	109941160	629
chr9	109941160	109941161	626
chr9	109941161	109941164	628
chr9	109941164	109941165	622
chr9	109941165	109941167	637
chr9	109941167	109941169	635
chr9	109941169	109941170	634
chr9	109941170	109941171	628
chr9	109941171	109941174	633
chr9	109941174	109941175	626
chr9	109941175	109941176	625
chr9	109941176	109941177	619
chr9	109941177	109941178	622
chr9	109941178	109941179	620
chr9	109941179	109941180	611
chr9	109941180	109941183	604
chr9	109941183	109941184	594
chr9	109941184	109941185	592
chr9	109941185	109941186	631
chr9	109941186	109941187	633
chr9	109941187	109941188	629
chr9	109941188	109941189	628
chr9	109941189	109941192	630
chr9	109941192	109941193	620
chr9	109941193	109941194	619
chr9	109941194	109941197	616
chr9	109941197	109941198	626
chr9	109941198	109941199	634
chr9	109941199	109941200	643
chr9	109941200	109941201	636
chr9	109941201	109941202	631
chr9	109941202	109941203	633
chr9	109941203	109941204	623
chr9	109941204	109941205	622
chr9	109941205	109941206	629
chr9	109941206	109941207	650
chr9	109941207	109941208	656
chr9	109941208	109941209	659
chr9	109941209	109941210	649
chr9	109941210	109941212	611
chr9	109941212	109941213	616
chr9	109941213	109941214	598
chr9	109941214	109941215	596
chr9	109941215	109941216	582
chr9	109941216	109941217	588
chr9	109941217	109941218	592
chr9	109941218	109941219	598
chr9	109941219	109941220	581
#bedGraph section chr9:109941220-109942342
chr9	109941220	109941221	582
chr9	109941221	109941222	575
chr9	109941222	109941223	574
chr9	109941223	109941224	566
chr9	109941224	109941225	527
chr9	109941225	109941226	533
chr9	109941226	109941227	528
chr9	109941227	109941228	523
chr9	109941228	109941229	509
chr9	109941229	109941230	513
chr9	109941230	109941233	512
chr9	109941233	109941234	515
chr9	109941234	109941235	518
chr9	109941235	109941236	519
chr9	109941236	109941237	510
chr9	109941237	109941238	499
chr9	109941238	109941239	503
chr9	109941239	109941240	522
chr9	109941240	109941241	521
chr9	109941241	109941242	520
chr9	109941242	109941243	518
chr9	109941243	109941244	514
chr9	109941244	109941245	512
chr9	109941245	109941246	498
chr9	109941246	109941247	500
chr9	109941247	109941248	499
chr9	109941248	109941249	501
chr9	109941249	109941250	518
chr9	109941250	109941251	503
chr9	109941251	109941253	494
chr9	109941253	109941254	492
chr9	109941254	109941256	485
chr9	109941256	109941257	487
chr9	109941257	109941258	485
chr9	109941258	109941259	486
chr9	109941259	109941260	473
chr9	109941260	109941261	478
chr9	109941261	109941262	472
chr9	109941262	109941263	473
chr9	109941263	109941264	474
chr9	109941264	109941265	481
chr9	109941265	109941267	484
chr9	109941267	109941268	479
chr9	109941268	109941269	482
chr9	109941269	109941270	479
chr9	109941270	109941271	485
chr9	109941271	109941272	475
chr9	109941272	109941273	473
chr9	109941273	109941274	477
chr9	109941274	109941275	486
chr9	109941275	109941276	484
chr9	109941276	109941277	478
chr9	109941277	109941278	475
chr9	109941278	109941279	477
chr9	109941279	109941280	476
chr9	109941280	109941281	477
chr9	109941281	109941283	478
chr9	109941283	109941284	480
chr9	109941284	109941285	486
chr9	109941285	109941286	450
chr9	109941286	109941289	451
chr9	109941289	109941290	447
chr9	109941290	109941291	444
chr9	109941291	109941292	447
chr9	109941292	109941293	451
chr9	109941293	109941294	455
chr9	109941294	109941295	464
chr9	109941295	109941296	465
chr9	109941296	109941297	471
chr9	109941297	109941298	460
chr9	109941298	109941299	451
chr9	109941299	109941300	441
chr9	109941300	109941301	458
chr9	109941301	109941302	470
chr9	109941302	109941303	467
chr9	109941303	109941304	458
chr9	109941304	109941305	466
chr9	109941305	109941306	461
chr9	109941306	109941307	438
chr9	109941307	109941308	433
chr9	109941308	109941309	428
chr9	109941309	109941310	421
chr9	109941310	109941311	422
chr9	109941311	109941312	419
chr9	109941312	109941313	414
chr9	109941313	109941314	426
chr9	109941314	109941316	429
chr9	109941316	109941317	422
chr9	109941317	109941318	402
chr9	109941318	109941319	395
chr9	109941319	109941320	401
chr9	109941320	109941321	405
chr9	109941321	109941322	419
chr9	109941322	109941323	426
chr9	109941323	109941324	422
chr9	109941324	109941325	412
chr9	109941325	109941326	415
chr9	109941326	109941327	424
chr9	109941327	109941328	429
chr9	109941328	109941329	430
chr9	109941329	109941330	449
chr9	109941330	109941331	464
chr9	109941331	109941332	473
chr9	109941332	109941334	474
chr9	109941334	109941335	490
chr9	109941335	109941336	496
chr9	109941336	109941337	502
chr9	109941337	109941338	523
chr9	109941338	109941339	519
chr9	109941339	109941340	502
chr9	109941340	109941341	505
chr9	109941341	109941343	521
chr9	109941343	109941344	526
chr9	109941344	109941346	543
chr9	109941346	109941347	539
chr9	109941347	109941348	542
chr9	109941348	109941349	541
chr9	109941349	109941350	528
chr9	109941350	109941351	530
chr9	109941351	109941352	529
chr9	109941352	109941353	528
chr9	109941353	109941354	533
chr9	109941354	109941355	541
chr9	109941355	109941356	536
chr9	109941356	109941357	535
chr9	109941357	109941358	539
chr9	109941358	109941359	545
chr9	109941359	109941360	560
chr9	109941360	109941361	579
chr9	109941361	109941362	583
chr9	109941362	109941363	584
chr9	109941363	109941364	591
chr9	109941364	109941365	597
chr9	109941365	109941366	580
chr9	109941366	109941367	584
chr9	109941367	109941368	580
chr9	109941368	109941369	581
chr9	109941369	109941370	580
chr9	109941370	109941371	581
chr9	109941371	109941372	585
chr9	109941372	109941373	587
chr9	109941373	109941374	589
chr9	109941374	109941375	595
chr9	109941375	109941376	609
chr9	109941376	109941377	618
chr9	109941377	109941378	619
chr9	109941378	109941379	620
chr9	109941379	109941380	707
chr9	109941380	109941381	718
chr9	109941381	109941382	720
chr9	109941382	109941383	731
chr9	109941383	109941384	726
chr9	109941384	109941385	721
chr9	109941385	109941389	734
chr9	109941389	109941390	735
chr9	109941390	109941391	737
chr9	109941391	109941392	733
chr9	109941392	109941393	726
chr9	109941393	109941394	723
chr9	109941394	109941395	715
chr9	109941395	109941396	748
chr9	109941396	109941398	746
chr9	109941398	109941400	747
chr9	109941400	109941401	731
chr9	109941401	109941402	728
chr9	109941402	109941403	733
chr9	109941403	109941404	734
chr9	109941404	109941405	729
chr9	109941405	109941406	726
chr9	109941406	109941407	756
chr9	109941407	109941408	753
chr9	109941408	109941409	752
chr9	109941409	109941410	755
chr9	109941410	109941411	760
chr9	109941411	109941412	758
chr9	109941412	109941413	780
chr9	109941413	109941415	768
chr9	109941415	109941416	772
chr9	109941416	109941417	776
chr9	109941417	109941418	784
chr9	109941418	109941420	790
chr9	109941420	109941421	780
chr9	109941421	109941422	775
chr9	109941422	109941423	776
chr9	109941423	109941424	777
chr9	109941424	109941425	785
chr9	109941425	109941426	782
chr9	109941426	109941427	776
chr9	109941427	109941428	791
chr9	109941428	109941429	793
chr9	109941429	109941430	781
chr9	109941430	109941431	774
chr9	109941431	109941432	766
chr9	109941432	109941433	783
chr9	109941433	109941434	785
chr9	109941434	109941435	769
chr9	109941435	109941436	761
chr9	109941436	109941437	757
chr9	109941437	109941438	733
chr9	109941438	109941440	738
chr9	109941440	109941441	735
chr9	109941441	109941442	720
chr9	109941442	109941443	731
chr9	109941443	109941444	738
chr9	109941444	109941445	726
chr9	109941445	109941446	725
chr9	109941446	109941447	732
chr9	109941447	109941448	741
chr9	109941448	109941450	750
chr9	109941450	109941451	749
chr9	109941451	109941453	750
chr9	109941453	109941454	751
chr9	109941454	109941455	742
chr9	109941455	109941456	741
chr9	109941456	109941457	742
chr9	109941457	109941458	741
chr9	109941458	109941459	742
chr9	109941459	109941460	771
chr9	109941460	109941461	752
chr9	109941461	109941462	756
chr9	109941462	109941463	757
chr9	109941463	109941464	766
chr9	109941464	109941466	755
chr9	109941466	109941468	748
chr9	109941468	109941469	747
chr9	109941469	109941470	761
chr9	109941470	109941471	757
chr9	109941471	109941472	776
chr9	109941472	109941473	773
chr9	109941473	109941474	769
chr9	109941474	109941475	762
chr9	109941475	109941476	757
chr9	109941476	109941477	749
chr9	109941477	109941478	750
chr9	109941478	109941479	749
chr9	109941479	109941480	662
chr9	109941480	109941482	652
chr9	109941482	109941483	659
chr9	109941483	109941484	684
chr9	109941484	109941485	681
chr9	109941485	109941486	672
chr9	109941486	109941487	667
chr9	109941487	109941489	671
chr9	109941489	109941490	669
chr9	109941490	109941491	673
chr9	109941491	109941492	681
chr9	109941492	109941493	686
chr9	109941493	109941494	687
chr9	109941494	109941495	690
chr9	109941495	109941496	657
chr9	109941496	109941497	651
chr9	109941497	109941499	660
chr9	109941499	109941500	661
chr9	109941500	109941501	660
chr9	109941501	109941502	653
chr9	109941502	109941503	649
chr9	109941503	109941504	648
chr9	109941504	109941505	646
chr9	109941505	109941506	648
chr9	109941506	109941507	624
chr9	109941507	109941508	623
chr9	109941508	109941509	619
chr9	109941509	109941510	611
chr9	109941510	109941511	607
chr9	109941511	109941512	614
chr9	109941512	109941513	591
chr9	109941513	109941514	587
chr9	109941514	109941515	586
chr9	109941515	109941516	585
chr9	109941516	109941517	625
chr9	109941517	109941518	618
chr9	109941518	109941519	611
chr9	109941519	109941520	602
chr9	109941520	109941521	605
chr9	109941521	109941522	607
chr9	109941522	109941523	606
chr9	109941523	109941524	609
chr9	109941524	109941525	612
chr9	109941525	109941526	606
chr9	109941526	109941527	604
chr9	109941527	109941529	586
chr9	109941529	109941530	581
chr9	109941530	109941531	573
chr9	109941531	109941532	689
chr9	109941532	109941533	671
chr9	109941533	109941534	665
chr9	109941534	109941535	662
chr9	109941535	109941536	670
chr9	109941536	109941537	692
chr9	109941537	109941538	703
chr9	109941538	109941539	698
chr9	109941539	109941540	702
chr9	109941540	109941541	698
chr9	109941541	109941542	697
chr9	109941542	109941543	705
chr9	109941543	109941545	692
chr9	109941545	109941546	696
chr9	109941546	109941547	698
chr9	109941547	109941548	690
chr9	109941548	109941549	681
chr9	109941549	109941550	675
chr9	109941550	109941551	690
chr9	109941551	109941552	701
chr9	109941552	109941553	707
chr9	109941553	109941554	703
chr9	109941554	109941556	704
chr9	109941556	109941557	703
chr9	109941557	109941558	707
chr9	109941558	109941559	703
chr9	109941559	109941560	677
chr9	109941560	109941561	670
chr9	109941561	109941562	664
chr9	109941562	109941563	666
chr9	109941563	109941564	651
chr9	109941564	109941565	647
chr9	109941565	109941566	646
chr9	109941566	109941567	650
chr9	109941567	109941568	649
chr9	109941568	109941569	646
chr9	109941569	109941570	632
chr9	109941570	109941571	630
chr9	109941571	109941572	606
chr9	109941572	109941573	605
chr9	109941573	109941574	602
chr9	109941574	109941575	594
chr9	109941575	109941577	582
chr9	109941577	109941578	578
chr9	109941578	109941579	577
chr9	109941579	109941580	578
chr9	109941580	109941582	580
chr9	109941582	109941583	573
chr9	109941583	109941584	559
chr9	109941584	109941585	561
chr9	109941585	109941586	553
chr9	109941586	109941587	580
chr9	109941587	109941588	583
chr9	109941588	109941589	584
chr9	109941589	109941590	590
chr9	109941590	109941591	600
chr9	109941591	109941592	596
chr9	109941592	109941593	605
chr9	109941593	109941594	608
chr9	109941594	109941595	610
chr9	109941595	109941596	615
chr9	109941596	109941597	616
chr9	109941597	109941598	612
chr9	109941598	109941599	622
chr9	109941599	109941600	636
chr9	109941600	109941601	651
chr9	109941601	109941602	655
chr9	109941602	109941603	661
chr9	109941603	109941604	664
chr9	109941604	109941605	668
chr9	109941605	109941606	670
chr9	109941606	109941607	679
chr9	109941607	109941608	691
chr9	109941608	109941609	690
chr9	109941609	109941611	694
chr9	109941611	109941612	689
chr9	109941612	109941613	696
chr9	109941613	109941614	698
chr9	109941614	109941615	695
chr9	109941615	109941616	688
chr9	109941616	109941617	645
chr9	109941617	109941618	642
chr9	109941618	109941619	645
chr9	109941619	109941620	658
chr9	109941620	109941621	679
chr9	109941621	109941622	671
chr9	109941622	109941624	663
chr9	109941624	109941625	655
chr9	109941625	109941626	672
chr9	109941626	109941627	683
chr9	109941627	109941628	690
chr9	109941628	109941629	695
chr9	109941629	109941630	689
chr9	109941630	109941631	690
chr9	109941631	109941632	572
chr9	109941632	109941633	573
chr9	109941633	109941634	574
chr9	109941634	109941635	582
chr9	109941635	109941636	578
chr9	109941636	109941637	558
chr9	109941637	109941640	559
chr9	109941640	109941641	562
chr9	109941641	109941642	567
chr9	109941642	109941643	561
chr9	109941643	109941644	562
chr9	109941644	109941645	557
chr9	109941645	109941646	554
chr9	109941646	109941649	547
chr9	109941649	109941650	548
chr9	109941650	109941651	536
chr9	109941651	109941652	521
chr9	109941652	109941653	512
chr9	109941653	109941654	516
chr9	109941654	109941655	525
chr9	109941655	109941656	531
chr9	109941656	109941657	534
chr9	109941657	109941659	538
chr9	109941659	109941660	521
chr9	109941660	109941661	519
chr9	109941661	109941662	522
chr9	109941662	109941663	526
chr9	109941663	109941664	532
chr9	109941664	109941665	542
chr9	109941665	109941666	544
chr9	109941666	109941667	543
chr9	109941667	109941668	545
chr9	109941668	109941669	548
chr9	109941669	109941671	549
chr9	109941671	109941672	552
chr9	109941672	109941673	560
chr9	109941673	109941674	574
chr9	109941674	109941675	587
chr9	109941675	109941676	592
chr9	109941676	109941677	594
chr9	109941677	109941678	596
chr9	109941678	109941679	606
chr9	109941679	109941680	611
chr9	109941680	109941681	613
chr9	109941681	109941682	609
chr9	109941682	109941683	603
chr9	109941683	109941684	602
chr9	109941684	109941685	601
chr9	109941685	109941686	617
chr9	109941686	109941687	604
chr9	109941687	109941688	598
chr9	109941688	109941689	604
chr9	109941689	109941690	605
chr9	109941690	109941692	591
chr9	109941692	109941693	582
chr9	109941693	109941694	583
chr9	109941694	109941695	590
chr9	109941695	109941696	606
chr9	109941696	109941697	608
chr9	109941697	109941698	603
chr9	109941698	109941699	594
chr9	109941699	109941700	585
chr9	109941700	109941701	573
chr9	109941701	109941702	572
chr9	109941702	109941703	566
chr9	109941703	109941704	571
chr9	109941704	109941705	568
chr9	109941705	109941706	586
chr9	109941706	109941707	573
chr9	109941707	109941708	575
chr9	109941708	109941709	577
chr9	109941709	109941710	574
chr9	109941710	109941711	575
chr9	109941711	109941712	577
chr9	109941712	109941713	576
chr9	109941713	109941714	574
chr9	109941714	109941715	578
chr9	109941715	109941716	580
chr9	109941716	109941717	578
chr9	109941717	109941718	579
chr9	109941718	109941719	577
chr9	109941719	109941720	575
chr9	109941720	109941721	550
chr9	109941721	109941722	553
chr9	109941722	109941724	554
chr9	109941724	109941725	558
chr9	109941725	109941726	546
chr9	109941726	109941727	540
chr9	109941727	109941728	532
chr9	109941728	109941729	526
chr9	109941729	109941730	530
chr9	109941730	109941731	532
chr9	109941731	109941732	534
chr9	109941732	109941733	533
chr9	109941733	109941734	534
chr9	109941734	109941735	533
chr9	109941735	109941736	553
chr9	109941736	109941737	555
chr9	109941737	109941738	550
chr9	109941738	109941739	554
chr9	109941739	109941740	551
chr9	109941740	109941741	566
chr9	109941741	109941742	561
chr9	109941742	109941743	579
chr9	109941743	109941745	582
chr9	109941745	109941747	584
chr9	109941747	109941748	587
chr9	109941748	109941750	589
chr9	109941750	109941751	586
chr9	109941751	109941752	593
chr9	109941752	109941753	624
chr9	109941753	109941754	622
chr9	109941754	109941755	617
chr9	109941755	109941756	614
chr9	109941756	109941757	615
chr9	109941757	109941758	609
chr9	109941758	109941759	607
chr9	109941759	109941760	610
chr9	109941760	109941761	611
chr9	109941761	109941762	613
chr9	109941762	109941763	608
chr9	109941763	109941764	605
chr9	109941764	109941765	598
chr9	109941765	109941766	610
chr9	109941766	109941767	609
chr9	109941767	109941768	639
chr9	109941768	109941770	652
chr9	109941770	109941772	655
chr9	109941772	109941773	653
chr9	109941773	109941774	639
chr9	109941774	109941775	630
chr9	109941775	109941776	636
chr9	109941776	109941777	634
chr9	109941777	109941778	638
chr9	109941778	109941779	630
chr9	109941779	109941780	625
chr9	109941780	109941783	618
chr9	109941783	109941784	621
chr9	109941784	109941785	624
chr9	109941785	109941786	609
chr9	109941786	109941787	595
chr9	109941787	109941788	594
chr9	109941788	109941789	600
chr9	109941789	109941790	601
chr9	109941790	109941791	616
chr9	109941791	109941792	614
chr9	109941792	109941793	610
chr9	109941793	109941794	606
chr9	109941794	109941795	595
chr9	109941795	109941796	573
chr9	109941796	109941797	575
chr9	109941797	109941798	585
chr9	109941798	109941799	583
chr9	109941799	109941800	592
chr9	109941800	109941801	589
chr9	109941801	109941802	586
chr9	109941802	109941803	590
chr9	109941803	109941804	586
chr9	109941804	109941805	587
chr9	109941805	109941806	567
chr9	109941806	109941807	564
chr9	109941807	109941808	550
chr9	109941808	109941809	548
chr9	109941809	109941810	549
chr9	109941810	109941812	546
chr9	109941812	109941813	547
chr9	109941813	109941814	549
chr9	109941814	109941816	547
chr9	109941816	109941818	548
chr9	109941818	109941819	550
chr9	109941819	109941820	542
chr9	109941820	109941821	541
chr9	109941821	109941822	535
chr9	109941822	109941823	546
chr9	109941823	109941824	548
chr9	109941824	109941825	549
chr9	109941825	109941826	546
chr9	109941826	109941827	541
chr9	109941827	109941828	546
chr9	109941828	109941830	543
chr9	109941830	109941831	537
chr9	109941831	109941832	586
chr9	109941832	109941834	597
chr9	109941834	109941835	591
chr9	109941835	109941836	570
chr9	109941836	109941837	565
chr9	109941837	109941838	560
chr9	109941838	109941839	565
chr9	109941839	109941840	570
chr9	109941840	109941842	560
chr9	109941842	109941843	535
chr9	109941843	109941844	533
chr9	109941844	109941845	538
chr9	109941845	109941846	536
chr9	109941846	109941847	544
chr9	109941847	109941848	548
chr9	109941848	109941849	549
chr9	109941849	109941851	556
chr9	109941851	109941852	548
chr9	109941852	109941854	520
chr9	109941854	109941855	523
chr9	109941855	109941857	527
chr9	109941857	109941858	525
chr9	109941858	109941859	526
chr9	109941859	109941860	531
chr9	109941860	109941861	532
chr9	109941861	109941862	527
chr9	109941862	109941863	534
chr9	109941863	109941864	531
chr9	109941864	109941865	527
chr9	109941865	109941867	516
chr9	109941867	109941868	499
chr9	109941868	109941869	485
chr9	109941869	109941870	487
chr9	109941870	109941871	494
chr9	109941871	109941873	491
chr9	109941873	109941874	496
chr9	109941874	109941875	492
chr9	109941875	109941876	483
chr9	109941876	109941877	484
chr9	109941877	109941878	497
chr9	109941878	109941879	499
chr9	109941879	109941880	500
chr9	109941880	109941881	508
chr9	109941881	109941882	510
chr9	109941882	109941883	505
chr9	109941883	109941884	492
chr9	109941884	109941885	491
chr9	109941885	109941886	497
chr9	109941886	109941887	506
chr9	109941887	109941888	513
chr9	109941888	109941889	504
chr9	109941889	109941890	505
chr9	109941890	109941891	489
chr9	109941891	109941892	486
chr9	109941892	109941893	487
chr9	109941893	109941894	490
chr9	109941894	109941895	489
chr9	109941895	109941896	494
chr9	109941896	109941897	488
chr9	109941897	109941898	481
chr9	109941898	109941899	495
chr9	109941899	109941900	483
chr9	109941900	109941902	498
chr9	109941902	109941904	494
chr9	109941904	109941905	493
chr9	109941905	109941907	504
chr9	109941907	109941908	505
chr9	109941908	109941909	516
chr9	109941909	109941910	514
chr9	109941910	109941911	519
chr9	109941911	109941912	520
chr9	109941912	109941913	517
chr9	109941913	109941914	514
chr9	109941914	109941915	509
chr9	109941915	109941916	514
chr9	109941916	109941917	521
chr9	109941917	109941918	533
chr9	109941918	109941919	544
chr9	109941919	109941920	545
chr9	109941920	109941921	546
chr9	109941921	109941922	556
chr9	109941922	109941923	544
chr9	109941923	109941924	539
chr9	109941924	109941925	534
chr9	109941925	109941926	535
chr9	109941926	109941927	540
chr9	109941927	109941928	541
chr9	109941928	109941929	544
chr9	109941929	109941931	546
chr9	109941931	109941932	501
chr9	109941932	109941933	499
chr9	109941933	109941934	547
chr9	109941934	109941935	565
chr9	109941935	109941936	575
chr9	109941936	109941937	579
chr9	109941937	109941938	595
chr9	109941938	109941939	590
chr9	109941939	109941940	583
chr9	109941940	109941941	575
chr9	109941941	109941942	574
chr9	109941942	109941943	572
chr9	109941943	109941944	570
chr9	109941944	109941946	565
chr9	109941946	109941947	556
chr9	109941947	109941948	548
chr9	109941948	109941949	546
chr9	109941949	109941950	543
chr9	109941950	109941951	544
chr9	109941951	109941952	577
chr9	109941952	109941953	574
chr9	109941953	109941954	584
chr9	109941954	109941955	580
chr9	109941955	109941956	574
chr9	109941956	109941957	569
chr9	109941957	109941958	578
chr9	109941958	109941959	581
chr9	109941959	109941960	572
chr9	109941960	109941961	570
chr9	109941961	109941962	569
chr9	109941962	109941963	561
chr9	109941963	109941964	560
chr9	109941964	109941965	563
chr9	109941965	109941967	560
chr9	109941967	109941968	545
chr9	109941968	109941969	543
chr9	109941969	109941970	545
chr9	109941970	109941972	535
chr9	109941972	109941973	529
chr9	109941973	109941974	537
chr9	109941974	109941975	538
chr9	109941975	109941976	537
chr9	109941976	109941977	538
chr9	109941977	109941978	527
chr9	109941978	109941979	521
chr9	109941979	109941980	519
chr9	109941980	109941981	510
chr9	109941981	109941982	509
chr9	109941982	109941983	511
chr9	109941983	109941984	515
chr9	109941984	109941985	512
chr9	109941985	109941986	505
chr9	109941986	109941987	499
chr9	109941987	109941988	491
chr9	109941988	109941989	502
chr9	109941989	109941991	501
chr9	109941991	109941992	502
chr9	109941992	109941993	500
chr9	109941993	109941994	495
chr9	109941994	109941995	496
chr9	109941995	109941996	492
chr9	109941996	109941998	501
chr9	109941998	109941999	488
chr9	109941999	109942000	486
chr9	109942000	109942001	473
[truncated: 900 more rows]

## Sheet: O_Myoblast
track type=wiggle_0 name="C2C12 Myob Raw" description="C2C12 Myoblast RNA-seq Raw Signal from ENCODE/Caltech"
#bedGraph section chr9:109951993-109966871
chr9	109954665	109954668	7
chr9	109954668	109954671	8
chr9	109954671	109954678	6
chr9	109954678	109954679	5
chr9	109954679	109954716	6
chr9	109954716	109954740	4
chr9	109954740	109954747	2
chr9	109954747	109954759	3
chr9	109954759	109954763	4
chr9	109954763	109954768	5
chr9	109954768	109954770	4
chr9	109954770	109954779	5
chr9	109954779	109954798	4
chr9	109954798	109954817	5
chr9	109954817	109954827	6
chr9	109954827	109954847	8
chr9	109954847	109954859	7
chr9	109954859	109954863	6
chr9	109954863	109954870	5
chr9	109954870	109954877	4
chr9	109954877	109954879	6
chr9	109954879	109954898	9
chr9	109954898	109954900	8
chr9	109954900	109954902	9
chr9	109954902	109954914	10
chr9	109954914	109954917	12
chr9	109954917	109954923	11
chr9	109954923	109954927	12
chr9	109954927	109954928	10
chr9	109954928	109954942	12
chr9	109954942	109954963	13
chr9	109954963	109954970	14
chr9	109954970	109954976	17
chr9	109954976	109954977	19
chr9	109954977	109954979	17
chr9	109954979	109955000	14
chr9	109955000	109955002	13
chr9	109955002	109955014	12
chr9	109955014	109955017	10
chr9	109955017	109955023	12
chr9	109955023	109955028	11
chr9	109955028	109955042	9
chr9	109955042	109955049	8
chr9	109955049	109955063	9
chr9	109955063	109955066	8
chr9	109955066	109955067	9
chr9	109955067	109955070	10
chr9	109955070	109955076	7
chr9	109955076	109955117	5
chr9	109955117	109955149	3
chr9	109955149	109955165	2
chr9	109955165	109955166	3
chr9	109955166	109955167	2
chr9	109955167	109955185	1
chr9	109955185	109955265	2
chr9	109955265	109955285	1
chr9	109955338	109955399	1
chr9	109955399	109955438	2
chr9	109955438	109955445	1
chr9	109955445	109955480	2
chr9	109955480	109955499	3
chr9	109955499	109955523	2
chr9	109955523	109955545	3
chr9	109955545	109955580	2
chr9	109955580	109955590	1
chr9	109955590	109955623	2
chr9	109955623	109955678	1
chr9	109955678	109955690	3
chr9	109955690	109955778	2
chr9	109955781	109955801	2
chr9	109955801	109955877	5
chr9	109955877	109955878	8
chr9	109955878	109955881	9
chr9	109955881	109955887	7
chr9	109955887	109955889	10
chr9	109955889	109955892	15
chr9	109955892	109955896	16
chr9	109955896	109955901	17
chr9	109955901	109955959	14
chr9	109955959	109955960	17
chr9	109955960	109955977	18
chr9	109955977	109955978	15
chr9	109955978	109955979	14
chr9	109955979	109955987	17
chr9	109955987	109955989	14
chr9	109955989	109955990	9
chr9	109955990	109955992	10
chr9	109955992	109955996	9
chr9	109955996	109956005	8
chr9	109956005	109956006	9
chr9	109956006	109956008	14
chr9	109956008	109956026	17

## Sheet: O_Myocyte 60h
track type=wiggle_0 name="C2C12 Myoc Raw" description="C2C12 Myocyte 60 h RNA-seq Raw Signal from ENCODE/Caltech"
#bedGraph section chr9:109951662-109956189
chr9	109954666	109954668	32
chr9	109954668	109954669	38
chr9	109954669	109954671	37
chr9	109954671	109954675	35
chr9	109954675	109954676	34
chr9	109954676	109954677	35
chr9	109954677	109954684	31
chr9	109954684	109954687	32
chr9	109954687	109954688	31
chr9	109954688	109954696	32
chr9	109954696	109954698	31
chr9	109954698	109954699	28
chr9	109954699	109954701	29
chr9	109954701	109954704	28
chr9	109954704	109954717	29
chr9	109954717	109954721	30
chr9	109954721	109954731	31
chr9	109954731	109954732	30
chr9	109954732	109954736	29
chr9	109954736	109954737	27
chr9	109954737	109954741	30
chr9	109954741	109954742	29
chr9	109954742	109954744	30
chr9	109954744	109954751	32
chr9	109954751	109954752	33
chr9	109954752	109954759	30
chr9	109954759	109954763	31
chr9	109954763	109954766	30
chr9	109954766	109954768	31
chr9	109954768	109954771	24
chr9	109954771	109954776	27
chr9	109954776	109954777	26
chr9	109954777	109954780	25
chr9	109954780	109954782	26
chr9	109954782	109954784	27
chr9	109954784	109954788	26
chr9	109954788	109954792	25
chr9	109954792	109954799	26
chr9	109954799	109954800	25
chr9	109954800	109954804	28
chr9	109954804	109954805	27
chr9	109954805	109954809	32
chr9	109954809	109954813	31
chr9	109954813	109954815	32
chr9	109954815	109954817	31
chr9	109954817	109954821	30
chr9	109954821	109954826	29
chr9	109954826	109954827	30
chr9	109954827	109954829	34
chr9	109954829	109954831	35
chr9	109954831	109954835	34
chr9	109954835	109954836	37
chr9	109954836	109954837	39
chr9	109954837	109954839	36
chr9	109954839	109954842	37
chr9	109954842	109954844	35
chr9	109954844	109954849	33
chr9	109954849	109954851	36
chr9	109954851	109954852	35
chr9	109954852	109954859	36
chr9	109954859	109954866	35
chr9	109954866	109954869	33
chr9	109954869	109954871	34
chr9	109954871	109954876	31
chr9	109954876	109954882	32
chr9	109954882	109954884	31
chr9	109954884	109954887	34
chr9	109954887	109954889	35
chr9	109954889	109954892	36
chr9	109954892	109954900	35
chr9	109954900	109954902	32
chr9	109954902	109954905	34
chr9	109954905	109954913	29
chr9	109954913	109954918	28
chr9	109954918	109954926	29
chr9	109954926	109954927	28
chr9	109954927	109954928	24
chr9	109954928	109954929	26
chr9	109954929	109954930	25
chr9	109954930	109954935	26
chr9	109954935	109954936	24
chr9	109954936	109954939	22
chr9	109954939	109954942	20
chr9	109954942	109954945	21
chr9	109954945	109954949	22
chr9	109954949	109954952	19
chr9	109954952	109954953	18
chr9	109954953	109954955	19
chr9	109954955	109954958	21
chr9	109954958	109954960	22
chr9	109954960	109954964	23
chr9	109954964	109954970	24
chr9	109954970	109954975	26
chr9	109954975	109954980	28
chr9	109954980	109954984	27
chr9	109954984	109954987	24
chr9	109954987	109954989	22
chr9	109954989	109955002	21
chr9	109955002	109955007	19
chr9	109955007	109955011	20
chr9	109955011	109955017	21
chr9	109955017	109955018	22
chr9	109955018	109955019	21
chr9	109955019	109955021	22
chr9	109955021	109955024	23
chr9	109955024	109955028	24
chr9	109955028	109955030	22
chr9	109955030	109955035	21
chr9	109955035	109955042	20
chr9	109955042	109955044	19
chr9	109955044	109955045	20
chr9	109955045	109955053	21
chr9	109955053	109955054	20
chr9	109955054	109955055	22
chr9	109955055	109955056	20
chr9	109955056	109955064	21
chr9	109955064	109955069	20
chr9	109955069	109955070	19
chr9	109955070	109955076	17
chr9	109955076	109955077	16
chr9	109955077	109955082	17
chr9	109955082	109955091	18
chr9	109955091	109955105	19
chr9	109955105	109955107	20
chr9	109955107	109955111	19
chr9	109955111	109955116	18
chr9	109955116	109955117	21
chr9	109955117	109955119	20
chr9	109955119	109955121	19
chr9	109955121	109955124	18
chr9	109955124	109955126	17
chr9	109955126	109955138	19
chr9	109955138	109955144	21
chr9	109955144	109955145	20
chr9	109955145	109955147	18
chr9	109955147	109955149	19
chr9	109955149	109955154	20
chr9	109955154	109955156	18
chr9	109955156	109955158	17
chr9	109955158	109955160	16
chr9	109955160	109955163	15
chr9	109955163	109955172	19
chr9	109955172	109955175	21
chr9	109955175	109955177	19
chr9	109955177	109955182	18
chr9	109955182	109955191	17
chr9	109955191	109955197	18
chr9	109955197	109955198	27
chr9	109955198	109955200	32
chr9	109955200	109955211	33
chr9	109955211	109955214	34
chr9	109955214	109955215	35
chr9	109955215	109955216	36
chr9	109955216	109955226	33
chr9	109955226	109955234	31
chr9	109955234	109955238	32
chr9	109955238	109955247	30
chr9	109955247	109955253	29
chr9	109955253	109955263	30
chr9	109955263	109955270	26
chr9	109955270	109955272	27
chr9	109955272	109955273	25
chr9	109955273	109955276	26
chr9	109955276	109955283	28
chr9	109955283	109955286	29
chr9	109955286	109955289	30
chr9	109955289	109955291	31
chr9	109955291	109955297	29
chr9	109955297	109955298	20
chr9	109955298	109955300	15
chr9	109955300	109955305	14
chr9	109955305	109955307	13
chr9	109955307	109955308	14
chr9	109955308	109955311	15
chr9	109955311	109955313	14
chr9	109955313	109955314	15
chr9	109955314	109955316	14
chr9	109955316	109955318	18
chr9	109955318	109955320	19
chr9	109955320	109955322	20
chr9	109955322	109955326	21
chr9	109955326	109955329	22
chr9	109955329	109955346	23
chr9	109955346	109955349	25
chr9	109955349	109955353	26
chr9	109955353	109955364	25
chr9	109955364	109955366	26
chr9	109955366	109955370	27
chr9	109955370	109955373	26
chr9	109955373	109955383	25
chr9	109955383	109955384	24
chr9	109955384	109955386	25
chr9	109955386	109955394	27
chr9	109955394	109955399	29
chr9	109955399	109955400	31
chr9	109955400	109955402	32
chr9	109955402	109955407	33
chr9	109955407	109955408	32
chr9	109955408	109955413	31
chr9	109955413	109955414	30
chr9	109955414	109955415	31
chr9	109955415	109955416	30
chr9	109955416	109955420	26
chr9	109955420	109955422	25
chr9	109955422	109955424	24
chr9	109955424	109955425	26
chr9	109955425	109955429	27
chr9	109955429	109955431	26
chr9	109955431	109955434	27
chr9	109955434	109955438	26
chr9	109955438	109955439	29
chr9	109955439	109955446	31
chr9	109955446	109955449	29
chr9	109955449	109955452	27
chr9	109955452	109955460	28
chr9	109955460	109955466	29
chr9	109955466	109955468	28
chr9	109955468	109955471	29
chr9	109955471	109955474	31
chr9	109955474	109955476	33
chr9	109955476	109955479	32
chr9	109955479	109955485	33
chr9	109955485	109955486	34
chr9	109955486	109955489	32
chr9	109955489	109955491	31
chr9	109955491	109955492	32
chr9	109955492	109955494	34
chr9	109955494	109955499	32
chr9	109955499	109955500	30
chr9	109955500	109955502	29
chr9	109955502	109955503	28
chr9	109955503	109955506	29
chr9	109955506	109955514	31
chr9	109955514	109955517	30
chr9	109955517	109955518	31
chr9	109955518	109955524	30
chr9	109955524	109955525	28
chr9	109955525	109955531	27
chr9	109955531	109955532	26
chr9	109955532	109955538	27
chr9	109955538	109955539	24
chr9	109955539	109955542	25
chr9	109955542	109955552	27
chr9	109955552	109955560	26
chr9	109955560	109955564	25
chr9	109955564	109955568	24
chr9	109955568	109955571	23
chr9	109955571	109955574	21
chr9	109955574	109955576	19
chr9	109955576	109955578	18
chr9	109955578	109955580	19
chr9	109955580	109955581	20
chr9	109955581	109955582	23
chr9	109955582	109955584	24
chr9	109955584	109955585	23
chr9	109955585	109955586	22
chr9	109955586	109955588	21
chr9	109955588	109955590	23
chr9	109955590	109955591	25
chr9	109955591	109955592	24
chr9	109955592	109955600	22
chr9	109955600	109955603	24
chr9	109955603	109955606	23
chr9	109955606	109955617	21
chr9	109955617	109955626	20
chr9	109955626	109955631	19
chr9	109955631	109955632	20
chr9	109955632	109955639	19
chr9	109955639	109955642	16
chr9	109955642	109955653	14
chr9	109955653	109955659	16
chr9	109955659	109955661	17
chr9	109955661	109955664	18
chr9	109955664	109955666	19
chr9	109955666	109955673	20
chr9	109955673	109955678	21
chr9	109955678	109955680	20
chr9	109955680	109955681	19
chr9	109955681	109955682	16
chr9	109955682	109955684	15
chr9	109955684	109955687	16
chr9	109955687	109955688	17
chr9	109955688	109955690	15
chr9	109955690	109955693	13
chr9	109955693	109955694	14
chr9	109955694	109955698	16
chr9	109955698	109955699	17
chr9	109955699	109955700	18
chr9	109955700	109955704	16
chr9	109955704	109955715	17
chr9	109955715	109955721	18
chr9	109955721	109955731	19
chr9	109955731	109955744	18
chr9	109955744	109955747	19
chr9	109955747	109955749	20
chr9	109955749	109955753	23
chr9	109955753	109955755	21
chr9	109955755	109955756	22
chr9	109955756	109955758	24
chr9	109955758	109955759	25
chr9	109955759	109955763	26
chr9	109955763	109955764	31
chr9	109955764	109955766	30
chr9	109955766	109955773	29
chr9	109955773	109955777	30
chr9	109955777	109955778	31
chr9	109955778	109955780	32
chr9	109955780	109955781	33
chr9	109955781	109955784	34
chr9	109955784	109955790	33
chr9	109955790	109955793	34
chr9	109955793	109955794	33
chr9	109955794	109955797	31
chr9	109955797	109955798	32
chr9	109955798	109955799	31
chr9	109955799	109955801	30
chr9	109955801	109955804	31
chr9	109955804	109955810	30
chr9	109955810	109955814	31
chr9	109955814	109955815	32
chr9	109955815	109955816	31
chr9	109955816	109955823	32
chr9	109955823	109955825	33
chr9	109955825	109955830	35
chr9	109955830	109955844	36
chr9	109955844	109955847	35
chr9	109955847	109955848	34
chr9	109955848	109955849	38
chr9	109955849	109955855	35
chr9	109955855	109955856	34
chr9	109955856	109955858	32
chr9	109955858	109955859	31
chr9	109955859	109955861	30
chr9	109955861	109955863	29
chr9	109955863	109955869	24
chr9	109955869	109955873	25
chr9	109955873	109955874	23
chr9	109955874	109955875	25
chr9	109955875	109955876	28
chr9	109955876	109955877	31
chr9	109955877	109955878	30
chr9	109955878	109955879	29
chr9	109955879	109955880	28
chr9	109955880	109955881	27
chr9	109955881	109955882	26
chr9	109955882	109955885	28
chr9	109955885	109955886	31
chr9	109955886	109955888	32
chr9	109955888	109955889	33
chr9	109955889	109955890	35
chr9	109955890	109955891	34
chr9	109955891	109955892	37
chr9	109955892	109955895	38
chr9	109955895	109955897	39
chr9	109955897	109955899	38
chr9	109955899	109955901	39
chr9	109955901	109955903	40
chr9	109955903	109955904	41
chr9	109955904	109955909	43
chr9	109955909	109955911	46
chr9	109955911	109955914	47
chr9	109955914	109955915	46
chr9	109955915	109955916	47
chr9	109955916	109955921	46
chr9	109955921	109955923	45
chr9	109955923	109955925	44
chr9	109955925	109955926	42
chr9	109955926	109955929	43
chr9	109955929	109955930	44
chr9	109955930	109955931	43
chr9	109955931	109955937	44
chr9	109955937	109955941	45
chr9	109955941	109955944	46
chr9	109955944	109955948	47
chr9	109955948	109955956	45
chr9	109955956	109955959	46
chr9	109955959	109955960	45
chr9	109955960	109955961	48
chr9	109955961	109955964	53
chr9	109955964	109955967	56
chr9	109955967	109955969	58
chr9	109955969	109955970	57
chr9	109955970	109955972	61
chr9	109955972	109955973	64
chr9	109955973	109955974	67
chr9	109955974	109955975	65
chr9	109955975	109955976	62
chr9	109955976	109955977	59
chr9	109955977	109955978	62
chr9	109955978	109955979	64
chr9	109955979	109955982	65
chr9	109955982	109955983	63
chr9	109955983	109955985	64
chr9	109955985	109955986	61
chr9	109955986	109955987	60
chr9	109955987	109955988	59
chr9	109955988	109955990	58
chr9	109955990	109955991	59
chr9	109955991	109955992	56
chr9	109955992	109955993	55
chr9	109955993	109955995	58
chr9	109955995	109955999	57
chr9	109955999	109956000	56
chr9	109956000	109956001	57
chr9	109956001	109956002	55
chr9	109956002	109956003	59
chr9	109956003	109956004	58
chr9	109956004	109956007	57
chr9	109956007	109956008	58
chr9	109956008	109956009	59
chr9	109956009	109956010	58
chr9	109956010	109956011	57
chr9	109956011	109956012	56
chr9	109956012	109956021	57
chr9	109956021	109956026	58
