# Supplementary material for: A novel isoform of MAP4 organises the paraxial microtubule array required for muscle cell differentiation
Source: eLife. 2015 Apr 21;4:e05697. doi: 10.7554/eLife.05697 (PMC4423121; doi:10.7554/eLife.05697)
Supplement: Supplementary file 2. — Affymetrix Exon Arrays. Affymetrix exon array data (Pohl et al., 2009) for four regions in MAP4 as shown in Figure 2—figure supplement 1. DOI: http://dx.doi.org/10.7554/eLife.05697.039 [file elife05697s002.xlsx]

## Sheet: Affymetrix - Replicates
Tissue	Expression score	Expression score	Expression score	Expression score
	oMAP4	mMAP4	N-term	C-term
Brain	3.14068	-0.18159	0.40486	0.24759
Brain	3.31139	-0.39586	0.37864	0.26075
Brain	3.22582	-0.61857	0.62512	0.33987
Embryo	0.68406	1.92057	-0.09233	-0.10385
Embryo	0.65874	2.0577	-0.01592	-0.15513
Embryo	0.88964	2.10995	0.20269	-0.05831
Heart	0.46469	2.84721	0.25599	0.34056
Heart	0.54164	3.2593	1.12967	0.10352
Heart	0.47467	2.64394	0.41101	0.28454
Kidney	-0.73074	-0.49314	-0.29855	-0.68619
Kidney	-0.35332	-0.01224	-0.29195	-0.74103
Kidney	-0.24916	0.20113	-0.3383	-0.63636
Liver	-0.58606	-0.56846	-0.58835	-1.11388
Liver	0.00351	0.0792	-0.70989	-0.87256
Liver	-1.12095	-0.76157	-0.67188	-0.97916
Lung	-0.03883	0.73253	0.20643	0.29813
Lung	-0.12999	0.65784	0.13913	0.17956
Lung	-0.05418	0.57011	0.32067	0.15141
Muscle	1.89934	3.69051	0.85467	0.16975
Muscle	1.74449	3.50212	0.28504	0.14389
Muscle	1.90004	3.49018	0.5047	0.14266
Ovary	0.1884	0.27037	0.02526	-0.12665
Ovary	0.2746	0.1922	-0.00247	-0.14064
Ovary	0.25969	-0.36288	0	-0.14508
Spleen	-0.33124	0.07815	-0.67263	-0.90531
Spleen	-0.27616	-0.21481	-0.77544	-1.05922
Spleen	-0.62996	-0.29282	-0.60245	-0.91027
Testicle	0.08164	0	0.37564	0.25892
Testicle	-0.04634	0.28114	0.47448	0.14535
Testicle	0	-0.20472	0.40112	0.26271
Thymus	-0.01825	-0.30118	-0.44985	0.07904
Thymus	-0.04127	0.17162	-0.42843	-0.08583
Thymus	-0.31719	-0.04016	-0.44684	-0.00493

## Sheet: Affymetrix - Averages
Tissue	Expression score		Expression score		Expression score		Expression score
	N-term	SD	C-term	SD	mMAP4	SD	oMAP4	SD
Brain	0.46954	0.13537	0.28274	0.04992	-0.39867	0.21851	3.22596	0.08536
Embryo	0.03148	0.15312	-0.10576	0.04844	2.02941	0.09781	0.74414	0.12663
Heart	0.59889	0.46616	0.24287	0.12389	2.91682	0.31353	0.49367	0.04185
Kidney	-0.3096	0.02507	-0.68786	0.05236	-0.10142	0.35562	-0.44441	0.25338
Liver	-0.65671	0.06217	-0.98853	0.12094	-0.41694	0.44039	-0.56784	0.56245
Lung	0.22207	0.09178	0.2097	0.07787	0.65349	0.0813	-0.07433	0.0488
Muscle	0.54814	0.28729	0.1521	0.0153	3.56094	0.11237	1.84796	0.08961
Ovary	0.0076	0.01535	-0.13746	0.00962	0.03323	0.34526	0.2409	0.04607
Spleen	-0.6835	0.08701	-0.95827	0.08746	-0.14316	0.19559	-0.41246	0.19037
Testicle	0.41708	0.05132	0.22232	0.06669	0.02547	0.24393	0.01177	0.0648
Thymus	-0.44171	0.0116	-0.00391	0.08244	-0.05657	0.23683	-0.12557	0.16634
